# Supplementary material for: Genetic Interactions Implicating Postreplicative Repair in Okazaki Fragment Processing
Source: PLoS Genet. 2015 Nov 6;11(11):e1005659. doi: 10.1371/journal.pgen.1005659 (PMC4636136; doi:10.1371/journal.pgen.1005659)
Supplement: S5 Table — (XLSX) [file pgen.1005659.s009.xlsx]

## Sheet: Randomization 1
BIOLOGICAL_PROCESS
GO_term	set	expected	enrichment	background	p_fisher(1side)	fdr	Name	Description
GO:0006272	5 of 36 (13.9%)	0.08	61.54	9 of 3988 (0.2%)	5.52e-09	2.15e-05	leading strand elongation	"The synthesis of DNA from a template strand in the 5' to 3' direction; leading strand elongation is continuous as it proceeds in the same direction as the replication fork." [ISBN:071673706X, ISBN:0815316194]	POL32(YJR043C);RFC5(YBR087W);POL3(YDL102W);POL31(YJR006W);RFC4(YOL094C)
GO:0006271	6 of 36 (16.7%)	0.22	27.69	24 of 3988 (0.6%)	4.19e-08	7.12e-05	DNA strand elongation involved in DNA replication	"The process in which a DNA strand is synthesized from template DNA during replication by the action of polymerases, which add nucleotides to the 3' end of the nascent DNA strand." [ISBN:071673706X, ISBN:0815316194]	POL32(YJR043C);RAD27(YKL113C);RFC5(YBR087W);POL3(YDL102W);POL31(YJR006W);RFC4(YOL094C)
GO:0022616	6 of 36 (16.7%)	0.23	26.59	25 of 3988 (0.6%)	5.48e-08	7.12e-05	DNA strand elongation	"The DNA metabolic process in which a DNA strand is synthesized by adding nucleotides to the 3' end of an existing DNA stand." [GOC:isa_complete]	POL32(YJR043C);RAD27(YKL113C);RFC5(YBR087W);POL3(YDL102W);POL31(YJR006W);RFC4(YOL094C)
GO:0043137	4 of 36 (11.1%)	0.06	63.30	7 of 3988 (0.2%)	1.92e-07	0.000187	DNA replication, removal of RNA primer	"Removal of the Okazaki RNA primer from the lagging strand of replicating DNA, by a combination of the actions of DNA polymerase, DNA helicase and an endonuclease." [GOC:jl, PMID:12424238]	POL32(YJR043C);RAD27(YKL113C);POL3(YDL102W);POL31(YJR006W)
GO:0006298	5 of 36 (13.9%)	0.15	32.58	17 of 3988 (0.4%)	2.57e-07	0.000201	mismatch repair	"A system for the correction of errors in which an incorrect base, which cannot form hydrogen bonds with the corresponding base in the parent strand, is incorporated into the daughter strand. The mismatch repair system promotes genomic fidelity by repairing base-base mismatches, insertion-deletion loops and heterologies generated during DNA replication and recombination." [ISBN:0198506732, PMID:1…	POL32(YJR043C);RFC5(YBR087W);POL3(YDL102W);POL31(YJR006W);RFC4(YOL094C)
GO:0006260	9 of 36 (25.0%)	1.04	8.67	115 of 3988 (2.9%)	4.94e-07	0.000321	DNA replication	"The cellular metabolic process in which a cell duplicates one or more molecules of DNA. DNA replication begins when specific sequences, known as origins of replication, are recognized and bound by initiation proteins, and ends when the original DNA molecule has been completely duplicated and the copies topologically separated. The unit of replication usually corresponds to the genome of the cell…	POL32(YJR043C);RAD27(YKL113C);RIF2(YLR453C);ELG1(YOR144C);REV1(YOR346W);RFC5(YBR087W);POL3(YDL102W);POL31(YJR006W);RFC4(YOL094C)
GO:0033567	4 of 36 (11.1%)	0.08	49.23	9 of 3988 (0.2%)	6.83e-07	0.00038	DNA replication, Okazaki fragment processing	"The DNA metabolic process, occurring during lagging strand synthesis, by which RNA primers are removed from Okazaki fragments, the resulting gaps filled by DNA polymerization, and the ends ligated to form a continuous strand." [GOC:mah, ISBN:0716720094]	POL32(YJR043C);RAD27(YKL113C);POL3(YDL102W);POL31(YJR006W)
GO:0006301	5 of 36 (13.9%)	0.21	24.08	23 of 3988 (0.6%)	1.35e-06	0.000656	postreplication repair	"The conversion of DNA-damage induced single-stranded gaps into large molecular weight DNA after replication. Includes pathways that remove replication-blocking lesions in conjunction with DNA replication." [GOC:elh]	POL32(YJR043C);RAD5(YLR032W);REV1(YOR346W);POL3(YDL102W);POL31(YJR006W)
GO:0006273	4 of 36 (11.1%)	0.12	34.09	13 of 3988 (0.3%)	3.78e-06	0.00147	lagging strand elongation	"The synthesis of DNA from a template strand in a net 3' to 5' direction. Lagging strand DNA elongation proceeds by discontinuous synthesis of short stretches of DNA, known as Okazaki fragments, from RNA primers; these fragments are then joined by DNA ligase. Although each segment of nascent DNA is synthesized in the 5' to 3' direction, the overall direction of lagging strand synthesis is 3' to 5…	POL32(YJR043C);RAD27(YKL113C);POL3(YDL102W);POL31(YJR006W)
GO:0006284	4 of 36 (11.1%)	0.12	34.09	13 of 3988 (0.3%)	3.78e-06	0.00147	base-excision repair	"In base excision repair, an altered base is removed by a DNA glycosylase enzyme, followed by excision of the resulting sugar phosphate. The small gap left in the DNA helix is filled in by the sequential action of DNA polymerase and DNA ligase." [ISBN:0815316194]	POL32(YJR043C);RAD27(YKL113C);POL3(YDL102W);POL31(YJR006W)
GO:0006281	10 of 36 (27.8%)	1.78	5.62	197 of 3988 (4.9%)	5.68e-06	0.00201	DNA repair	"The process of restoring DNA after damage. Genomes are subject to damage by chemical and physical agents in the environment (e.g. UV and ionizing radiations, chemical mutagens, fungal and bacterial toxins, etc.) and by free radicals or alkylating agents endogenously generated in metabolism. DNA is also damaged because of errors during its replication. A variety of different DNA repair pathways h…	POL32(YJR043C);RAD27(YKL113C);RAD5(YLR032W);PSO2(YMR137C);ELG1(YOR144C);REV1(YOR346W);RFC5(YBR087W);POL3(YDL102W);POL31(YJR006W);RFC4(YOL094C)
GO:0006261	7 of 36 (19.4%)	0.75	9.34	83 of 3988 (2.1%)	6.72e-06	0.00218	DNA-dependent DNA replication	"A DNA replication process that uses parental DNA as a template for the DNA-dependent DNA polymerases that synthesize the new strands." [GOC:mah, ISBN:0198506732]	POL32(YJR043C);RAD27(YKL113C);ELG1(YOR144C);RFC5(YBR087W);POL3(YDL102W);POL31(YJR006W);RFC4(YOL094C)
GO:0006278	4 of 36 (11.1%)	0.15	26.07	17 of 3988 (0.4%)	1.23e-05	0.00367	RNA-dependent DNA replication	"A DNA replication process that uses RNA as a template for RNA-dependent DNA polymerases (e.g. reverse transcriptase) that synthesize the new strands." [GOC:mah, ISBN:0198506732]	POL32(YJR043C);RIF2(YLR453C);POL3(YDL102W);POL31(YJR006W)
GO:0006974	10 of 36 (27.8%)	2.07	4.84	229 of 3988 (5.7%)	2.17e-05	0.00604	response to DNA damage stimulus	"Any process that results in a change in state or activity of a cell (in terms of movement, secretion, enzyme production, gene expression, etc.) as a result of a stimulus indicating damage to its DNA from environmental insults or errors during metabolism." [GOC:go_curators]	POL32(YJR043C);RAD27(YKL113C);RAD5(YLR032W);PSO2(YMR137C);ELG1(YOR144C);REV1(YOR346W);RFC5(YBR087W);POL3(YDL102W);POL31(YJR006W);RFC4(YOL094C)
GO:0033554	13 of 36 (36.1%)	3.84	3.39	425 of 3988 (10.7%)	4.41e-05	0.0115	cellular response to stress	"Any process that results in a change in state or activity of a cell (in terms of movement, secretion, enzyme production, gene expression, etc.) as a result of a stimulus indicating the organism is under stress. The stress is usually, but not necessarily, exogenous (e.g. temperature, humidity, ionizing radiation)." [GOC:mah]	GPD1(YDL022W);SKN7(YHR206W);POL32(YJR043C);RAD27(YKL113C);RAD5(YLR032W);PSO2(YMR137C);YNL190W(YNL190W);ELG1(YOR144C);REV1(YOR346W);RFC5(YBR087W);POL3(YDL102W);POL31(YJR006W);RFC4(YOL094C)
GO:0006259	11 of 36 (30.6%)	3.10	3.55	343 of 3988 (8.6%)	0.000136	0.0332	DNA metabolic process	"Any cellular metabolic process involving deoxyribonucleic acid. This is one of the two main types of nucleic acid, consisting of a long, unbranched macromolecule formed from one, or more commonly, two, strands of linked deoxyribonucleotides." [ISBN:0198506732]	POL32(YJR043C);RAD27(YKL113C);RAD5(YLR032W);RIF2(YLR453C);PSO2(YMR137C);ELG1(YOR144C);REV1(YOR346W);RFC5(YBR087W);POL3(YDL102W);POL31(YJR006W);RFC4(YOL094C)
GO:0006950	14 of 36 (38.9%)	4.98	2.81	552 of 3988 (13.8%)	0.000162	0.0372	response to stress	"Any process that results in a change in state or activity of a cell or an organism (in terms of movement, secretion, enzyme production, gene expression, etc.) as a result of a disturbance in organismal or cellular homeostasis, usually, but not necessarily, exogenous (e.g. temperature, humidity, ionizing radiation)." [GOC:mah]	PAU24(YBR301W);GPD1(YDL022W);SKN7(YHR206W);POL32(YJR043C);RAD27(YKL113C);RAD5(YLR032W);PSO2(YMR137C);YNL190W(YNL190W);ELG1(YOR144C);REV1(YOR346W);RFC5(YBR087W);POL3(YDL102W);POL31(YJR006W);RFC4(YOL094C)
GO:0071897	3 of 36 (8.3%)	0.14	22.16	15 of 3988 (0.4%)	0.000285	0.0618	DNA biosynthetic process	"The cellular DNA metabolic process resulting in the formation of DNA, deoxyribonucleic acid, one of the two main types of nucleic acid, consisting of a long unbranched macromolecule formed from one or two strands of linked deoxyribonucleotides, the 3'-phosphate group of each constituent deoxyribonucleotide being joined in 3',5'-phosphodiester linkage to the 5'-hydroxyl group of the deoxyribose m…	RAD27(YKL113C);RAD5(YLR032W);REV1(YOR346W)
GO:0006302	5 of 36 (13.9%)	0.66	7.59	73 of 3988 (1.8%)	0.000434	0.089	double-strand break repair	"The repair of double-strand breaks in DNA via homologous and nonhomologous mechanisms to reform a continuous DNA helix." [GOC:elh]	POL32(YJR043C);RAD27(YKL113C);RAD5(YLR032W);PSO2(YMR137C);ELG1(YOR144C)
GO:0051716	14 of 36 (38.9%)	5.89	2.38	652 of 3988 (16.3%)	0.000951	0.185	cellular response to stimulus	"Any process that results in a change in state or activity of a cell (in terms of movement, secretion, enzyme production, gene expression, etc.) as a result of a stimulus. The process begins with detection of the stimulus by a cell and ends with a change in state or activity or the cell." [GOC:bf, GOC:jl]	GPD1(YDL022W);SKN7(YHR206W);POL32(YJR043C);RAD27(YKL113C);RAD5(YLR032W);PSO2(YMR137C);YNL190W(YNL190W);ELG1(YOR144C);REV1(YOR346W);RFC5(YBR087W);POL3(YDL102W);EXO70(YJL085W);POL31(YJR006W);RFC4(YOL094C)
GO:0050896	16 of 36 (44.4%)	7.49	2.14	830 of 3988 (20.8%)	0.00115	0.213	response to stimulus	"Any process that results in a change in state or activity of a cell or an organism (in terms of movement, secretion, enzyme production, gene expression, etc.) as a result of a stimulus. The process begins with detection of the stimulus and ends with a change in state or activity or the cell or organism." [GOC:ai, GOC:bf]	PAU24(YBR301W);GPD1(YDL022W);SKN7(YHR206W);POL32(YJR043C);RAD27(YKL113C);STE6(YKL209C);RAD5(YLR032W);PSO2(YMR137C);YNL190W(YNL190W);ELG1(YOR144C);REV1(YOR346W);RFC5(YBR087W);POL3(YDL102W);EXO70(YJL085W);POL31(YJR006W);RFC4(YOL094C)
GO:0042276	2 of 36 (5.6%)	0.09	22.16	10 of 3988 (0.3%)	0.00341	0.604	error-prone translesion synthesis	"The conversion of DNA-damage induced single-stranded gaps into large molecular weight DNA after replication by using a specialized DNA polymerase or replication complex to insert a defined nucleotide across the lesion. This process does not remove the replication-blocking lesions and causes an increase in the endogenous mutation level. For example, in E. coli, a low fidelity DNA polymerase, pol …	RAD5(YLR032W);REV1(YOR346W)
GO:0006289	3 of 36 (8.3%)	0.34	8.75	38 of 3988 (1.0%)	0.00459	0.758	nucleotide-excision repair	"A DNA repair process in which a small region of the strand surrounding the damage is removed from the DNA helix as an oligonucleotide. The small gap left in the DNA helix is filled in by the sequential action of DNA polymerase and DNA ligase. Nucleotide excision repair recognizes a wide range of substrates, including damage caused by UV irradiation (pyrimidine dimers and 6-4 photoproducts) and c…	POL32(YJR043C);POL3(YDL102W);POL31(YJR006W)
GO:0065008	8 of 36 (22.2%)	2.74	2.92	303 of 3988 (7.6%)	0.00467	0.758	regulation of biological quality	"Any process that modulates a qualitative or quantitative trait of a biological quality. A biological quality is a measurable attribute of an organism or part of an organism, such as size, mass, shape, color, etc." [GOC:dph, GOC:isa_complete, GOC:mah, GOC:pr, GOC:vw]	GPD1(YDL022W);SKN7(YHR206W);MNR2(YKL064W);STE6(YKL209C);RAD5(YLR032W);RIF2(YLR453C);ELG1(YOR144C);FSF1(YOR271C)
GO:0019985	2 of 36 (5.6%)	0.11	18.46	12 of 3988 (0.3%)	0.00494	0.77	translesion synthesis	"The replication of damaged DNA by synthesis across a lesion in the template strand; a specialized DNA polymerase or replication complex inserts a defined nucleotide across from the lesion which allows DNA synthesis to continue beyond the lesion. This process can be mutagenic depending on the damaged nucleotide and the inserted nucleotide." [GOC:elh, PMID:10535901]	RAD5(YLR032W);REV1(YOR346W)
GO:0007062	3 of 36 (8.3%)	0.37	8.11	41 of 3988 (1.0%)	0.00569	0.838	sister chromatid cohesion	"The cell cycle process in which the sister chromatids of a replicated chromosome are joined along the entire length of the chromosome." [GOC:mah, ISBN:0815316194]	ELG1(YOR144C);RFC5(YBR087W);RFC4(YOL094C)
GO:0006401	4 of 36 (11.1%)	0.74	5.40	82 of 3988 (2.1%)	0.00593	0.838	RNA catabolic process	"The chemical reactions and pathways resulting in the breakdown of RNA, ribonucleic acid, one of the two main type of nucleic acid, consisting of a long, unbranched macromolecule formed from ribonucleotides joined in 3',5'-phosphodiester linkage." [ISBN:0198506732]	POL32(YJR043C);RAD27(YKL113C);POL3(YDL102W);POL31(YJR006W)
GO:0042592	6 of 36 (16.7%)	1.72	3.50	190 of 3988 (4.8%)	0.00636	0.838	homeostatic process	"Any biological process involved in the maintenance of an internal steady state." [GOC:jl, ISBN:0395825172]	GPD1(YDL022W);MNR2(YKL064W);RAD5(YLR032W);RIF2(YLR453C);ELG1(YOR144C);FSF1(YOR271C)
GO:0006973	1 of 36 (2.8%)	0.01	110.78	1 of 3988 (0.0%)	0.00903	0.838	intracellular accumulation of glycerol	"The accumulation of glycerol within a cell, for example by increased glycerol biosynthesis combined with decreased permeability of the cell membrane to glycerol, in response to the detection of a hyperosmotic environment." [GOC:jl, PMID:11752666]	GPD1(YDL022W)
GO:0010961	1 of 36 (2.8%)	0.01	110.78	1 of 3988 (0.0%)	0.00903	0.838	cellular magnesium ion homeostasis	"Any process involved in the maintenance of an internal steady state of magnesium ions at the level of a cell." [GOC:dph, GOC:tb]	MNR2(YKL064W)
GO:0010960	1 of 36 (2.8%)	0.01	110.78	1 of 3988 (0.0%)	0.00903	0.838	magnesium ion homeostasis	"Any process involved in the maintenance of an internal steady state of magnesium ions within an organism or cell." [GOC:dph, GOC:tb]	MNR2(YKL064W)
GO:0006286	1 of 36 (2.8%)	0.01	110.78	1 of 3988 (0.0%)	0.00903	0.838	base-excision repair, base-free sugar-phosphate removal	"Excision of the sugar phosphate residue at an AP site, i.e. a deoxyribose sugar with a missing base, by a phosphodiesterase enzyme." [ISBN:0815316194]	RAD27(YKL113C)
GO:0000770	1 of 36 (2.8%)	0.01	110.78	1 of 3988 (0.0%)	0.00903	0.838	peptide pheromone export	"The directed movement of a peptide pheromone out of a cell by a secretion or export pathway used solely for the export of peptide pheromones." [GOC:elh]	STE6(YKL209C)
GO:0030072	1 of 36 (2.8%)	0.01	110.78	1 of 3988 (0.0%)	0.00903	0.838	peptide hormone secretion	"The regulated release of a peptide hormone from a cell or organ." [GOC:mah]	STE6(YKL209C)
GO:0002790	1 of 36 (2.8%)	0.01	110.78	1 of 3988 (0.0%)	0.00903	0.838	peptide secretion	"The controlled release of a peptide from a cell or group of cells." [GOC:add]	STE6(YKL209C)
GO:0046879	1 of 36 (2.8%)	0.01	110.78	1 of 3988 (0.0%)	0.00903	0.838	hormone secretion	"The regulated release of hormones, substances with a specific regulatory effect on a particular organ or group of cells." [ISBN:0198506732]	STE6(YKL209C)
GO:0009914	1 of 36 (2.8%)	0.01	110.78	1 of 3988 (0.0%)	0.00903	0.838	hormone transport	"The directed movement of hormones into, out of or within a cell, or between cells, by means of some agent such as a transporter or pore." [GOC:tb]	STE6(YKL209C)
GO:0023061	1 of 36 (2.8%)	0.01	110.78	1 of 3988 (0.0%)	0.00903	0.838	signal release	"The process in which a signal is secreted or discharged into the extracellular medium from a cellular source." [GOC:mtg_signal]	STE6(YKL209C)
GO:0010817	1 of 36 (2.8%)	0.01	110.78	1 of 3988 (0.0%)	0.00903	0.838	regulation of hormone levels	"Any process that modulates the levels of hormone within an organism or a tissue. A hormone is any substance formed in very small amounts in one specialized organ or group of cells and carried (sometimes in the bloodstream) to another organ or group of cells in the same organism, upon which it has a specific regulatory action." [GOC:BHF, GOC:dph, GOC:tb]	STE6(YKL209C)
GO:0003001	1 of 36 (2.8%)	0.01	110.78	1 of 3988 (0.0%)	0.00903	0.838	generation of a signal involved in cell-cell signaling	"The cellular process that creates a physical entity or change in state, i.e. a signal, that originates in one cell and is used to transfer information to another cell. This process begins with the initial formation of the signal and ends with the mature form and placement of the signal." [GOC:dph]	STE6(YKL209C)
GO:0007267	1 of 36 (2.8%)	0.01	110.78	1 of 3988 (0.0%)	0.00903	0.838	cell-cell signaling	"Any process that mediates the transfer of information from one cell to another." [GOC:mah]	STE6(YKL209C)
GO:0006287	1 of 36 (2.8%)	0.01	110.78	1 of 3988 (0.0%)	0.00903	0.838	base-excision repair, gap-filling	"Repair of the damaged strand by the combined action of an apurinic endouclease that degrades a few bases on the damaged strand and a polymerase that synthesizes a 'patch' in the 5' to 3' direction, using the undamaged strand as a template." [ISBN:1550091131]	POL3(YDL102W)
GO:0046168	1 of 36 (2.8%)	0.02	55.39	2 of 3988 (0.1%)	0.018	1	glycerol-3-phosphate catabolic process	"The chemical reactions and pathways resulting in the breakdown of glycerol-3-phosphate, a phosphoric monoester of glycerol." [GOC:ai]	GPD1(YDL022W)
GO:0034553	1 of 36 (2.8%)	0.02	55.39	2 of 3988 (0.1%)	0.018	1	mitochondrial respiratory chain complex II assembly	"The aggregation, arrangement and bonding together of a set of components to form respiratory chain complex II, in the mitochondrial inner membrane." [GOC:dgf]	YDR379C-A(YDR379C-A)
GO:0034552	1 of 36 (2.8%)	0.02	55.39	2 of 3988 (0.1%)	0.018	1	respiratory chain complex II assembly	"The aggregation, arrangement and bonding together of a set of components to form respiratory chain complex II." [GOC:dgf]	YDR379C-A(YDR379C-A)
GO:0097032	1 of 36 (2.8%)	0.02	55.39	2 of 3988 (0.1%)	0.018	1	mitochondrial respiratory chain complex II biogenesis	"The biogenesis of a mitochondrial respiratory chain complex II, a protein complex located in the mitochondrial inner membrane that forms part of the mitochondrial respiratory chain. Includes the synthesis of constituent proteins and their aggregation, arrangement and bonding together." [GOC:pr]	YDR379C-A(YDR379C-A)
GO:0000734	1 of 36 (2.8%)	0.02	55.39	2 of 3988 (0.1%)	0.018	1	gene conversion at mating-type locus, DNA repair synthesis	"Synthesis of DNA that proceeds from the broken 3' single-strand DNA end uses the homologous intact duplex as the template during gene conversion at the mating-type locus." [GOC:elh]	RAD27(YKL113C)
GO:0042631	1 of 36 (2.8%)	0.02	55.39	2 of 3988 (0.1%)	0.018	1	cellular response to water deprivation	"Any process that results in a change in state or activity of a cell (in terms of movement, secretion, enzyme production, gene expression, etc.) as a result of deprivation of water." [GOC:go_curators]	YNL190W(YNL190W)
GO:0009414	1 of 36 (2.8%)	0.02	55.39	2 of 3988 (0.1%)	0.018	1	response to water deprivation	"Any process that results in a change in state or activity of a cell or an organism (in terms of movement, secretion, enzyme production, gene expression, etc.) as a result of a water deprivation stimulus, prolonged deprivation of water." [GOC:lr]	YNL190W(YNL190W)
GO:0045004	1 of 36 (2.8%)	0.02	55.39	2 of 3988 (0.1%)	0.018	1	DNA replication proofreading	"Correction of replication errors by DNA polymerase using a 3'-5' exonuclease activity." [GOC:ai]	POL3(YDL102W)
GO:0006297	1 of 36 (2.8%)	0.02	55.39	2 of 3988 (0.1%)	0.018	1	nucleotide-excision repair, DNA gap filling	"Repair of the gap in the DNA helix by DNA polymerase and DNA ligase after the portion of the strand containing the lesion has been removed by pyrimidine-dimer repair enzymes." [ISBN:0815316194]	POL3(YDL102W)
GO:0006072	1 of 36 (2.8%)	0.03	36.93	3 of 3988 (0.1%)	0.0268	1	glycerol-3-phosphate metabolic process	"The chemical reactions and pathways involving glycerol-3-phosphate, a phosphoric monoester of glycerol." [GOC:go_curators, ISBN:0198506732]	GPD1(YDL022W)
GO:0000304	1 of 36 (2.8%)	0.03	36.93	3 of 3988 (0.1%)	0.0268	1	response to singlet oxygen	"Any process that results in a change in state or activity of a cell or an organism (in terms of movement, secretion, enzyme production, gene expression, etc.) as a result of a singlet oxygen stimulus. Singlet oxygen is a dioxygen (O2) molecule in which two 2p electrons have similar spin. Singlet oxygen is more highly reactive than the form in which these electrons are of opposite spin, and it is…	SKN7(YHR206W)
GO:0010994	1 of 36 (2.8%)	0.03	36.93	3 of 3988 (0.1%)	0.0268	1	free ubiquitin chain polymerization	"The process of creating free ubiquitin chains, compounds composed of a large number of ubiquitin monomers. These chains are not conjugated to a protein." [GOC:BHF, GOC:dph, GOC:tb]	RAD5(YLR032W)
GO:0051436	1 of 36 (2.8%)	0.03	36.93	3 of 3988 (0.1%)	0.0268	1	negative regulation of ubiquitin-protein ligase activity involved in mitotic cell cycle	"Any process that stops, prevents, or reduces the frequency, rate or extent of ubiquitin ligase activity that contributes to the mitotic cell cycle." [GOC:ai, GOC:tb]	ACM1(YPL267W)
GO:0044265	6 of 36 (16.7%)	2.41	2.49	267 of 3988 (6.7%)	0.0303	1	cellular macromolecule catabolic process	"The chemical reactions and pathways resulting in the breakdown of a macromolecule, any large molecule including proteins, nucleic acids and carbohydrates, as carried out by individual cells." [CHEBI:33694, GOC:jl]	DAS1(YJL149W);POL32(YJR043C);RAD27(YKL113C);POL3(YDL102W);PUP3(YER094C);POL31(YJR006W)
GO:0034655	5 of 36 (13.9%)	1.79	2.80	198 of 3988 (5.0%)	0.0309	1	nucleobase-containing compound catabolic process	"The chemical reactions and pathways resulting in the breakdown of nucleobases, nucleosides, nucleotides and nucleic acids." [GOC:mah]	POL32(YJR043C);RAD27(YKL113C);STE6(YKL209C);POL3(YDL102W);POL31(YJR006W)
GO:0071214	2 of 36 (5.6%)	0.30	6.71	33 of 3988 (0.8%)	0.0351	1	cellular response to abiotic stimulus	"Any process that results in a change in state or activity of a cell (in terms of movement, secretion, enzyme production, gene expression, etc.) as a result of an abiotic (non-living) stimulus." [GOC:mah]	GPD1(YDL022W);YNL190W(YNL190W)
GO:0000731	1 of 36 (2.8%)	0.04	27.69	4 of 3988 (0.1%)	0.0356	1	DNA synthesis involved in DNA repair	"Synthesis of DNA that proceeds from the broken 3' single-strand DNA end uses the homologous intact duplex as the template." [PMID:10357855]	RAD27(YKL113C)
GO:0010993	1 of 36 (2.8%)	0.04	27.69	4 of 3988 (0.1%)	0.0356	1	regulation of ubiquitin homeostasis	"Any process that modulates the rate, frequency, or extent of ubiquitin homeostasis. Ubiquitin homeostasis is any process involved in the maintenance of an internal steady state of ubiquitin monomers and free ubiquitin chains at the level of the cell." [GOC:BHF, GOC:dph, GOC:tb]	RAD5(YLR032W)
GO:0010992	1 of 36 (2.8%)	0.04	27.69	4 of 3988 (0.1%)	0.0356	1	ubiquitin homeostasis	"Any process involved in the maintenance of an internal steady state of ubiquitin monomers and free ubiquitin chains at the level of the cell." [GOC:BHF, GOC:dph, GOC:tb]	RAD5(YLR032W)
GO:0071462	1 of 36 (2.8%)	0.04	27.69	4 of 3988 (0.1%)	0.0356	1	cellular response to water stimulus	"Any process that results in a change in state or activity of a cell (in terms of movement, secretion, enzyme production, gene expression, etc.) as a result of a stimulus reflecting the presence, absence, or concentration of water." [GOC:mah]	YNL190W(YNL190W)
GO:0009415	1 of 36 (2.8%)	0.04	27.69	4 of 3988 (0.1%)	0.0356	1	response to water stimulus	"Any process that results in a change in state or activity of a cell or an organism (in terms of movement, secretion, enzyme production, gene expression, etc.) as a result of a stimulus reflecting the presence, absence, or concentration of water." [GOC:jl]	YNL190W(YNL190W)
GO:0051444	1 of 36 (2.8%)	0.04	27.69	4 of 3988 (0.1%)	0.0356	1	negative regulation of ubiquitin-protein ligase activity	"Any process that stops, prevents, or reduces the frequency, rate or extent of ubiquitin ligase activity, the catalysis of the reaction: ATP + ubiquitin + protein lysine = AMP + diphosphate + protein N-ubiquityllysine." [EC:6.3.2.19, GOC:ai, GOC:tb]	ACM1(YPL267W)
GO:0031397	1 of 36 (2.8%)	0.04	27.69	4 of 3988 (0.1%)	0.0356	1	negative regulation of protein ubiquitination	"Any process that stops, prevents, or reduces the frequency, rate or extent of the addition of ubiquitin groups to a protein." [GOC:mah]	ACM1(YPL267W)
GO:0051352	1 of 36 (2.8%)	0.04	27.69	4 of 3988 (0.1%)	0.0356	1	negative regulation of ligase activity	"Any process that stops or reduces the rate of ligase activity, the catalysis of the ligation of two substances with concomitant breaking of a diphosphate linkage, usually in a nucleoside triphosphate." [GOC:ai]	ACM1(YPL267W)
GO:0001927	1 of 36 (2.8%)	0.04	27.69	4 of 3988 (0.1%)	0.0356	1	exocyst assembly	"The aggregation, arrangement and bonding together of various polypeptides into the exocyst complex." [GOC:hjd, PMID:9700152, Wikipedia:Exocyst]	EXO70(YJL085W)
GO:0019439	5 of 36 (13.9%)	1.90	2.64	210 of 3988 (5.3%)	0.0384	1	aromatic compound catabolic process	"The chemical reactions and pathways resulting in the breakdown of aromatic compounds, any substance containing an aromatic carbon ring." [GOC:ai]	POL32(YJR043C);RAD27(YKL113C);STE6(YKL209C);POL3(YDL102W);POL31(YJR006W)
GO:0009057	6 of 36 (16.7%)	2.56	2.34	284 of 3988 (7.1%)	0.0393	1	macromolecule catabolic process	"The chemical reactions and pathways resulting in the breakdown of a macromolecule, any molecule of high relative molecular mass, the structure of which essentially comprises the multiple repetition of units derived, actually or conceptually, from molecules of low relative molecular mass." [CHEBI:33694, GOC:mah]	DAS1(YJL149W);POL32(YJR043C);RAD27(YKL113C);POL3(YDL102W);PUP3(YER094C);POL31(YJR006W)
GO:0034645	14 of 36 (38.9%)	8.87	1.58	983 of 3988 (24.6%)	0.0407	1	cellular macromolecule biosynthetic process	"The chemical reactions and pathways resulting in the formation of a macromolecule, any molecule of high relative molecular mass, the structure of which essentially comprises the multiple repetition of units derived, actually or conceptually, from molecules of low relative molecular mass, carried out by individual cells." [CHEBI:33694, GOC:mah]	TBS1(YBR150C);SKN7(YHR206W);POL32(YJR043C);RAD27(YKL113C);RAD5(YLR032W);RIF2(YLR453C);ELG1(YOR144C);REV1(YOR346W);ACM1(YPL267W);RFC5(YBR087W);POL3(YDL102W);POL31(YJR006W);RPC37(YKR025W);RFC4(YOL094C)
GO:0009059	14 of 36 (38.9%)	8.92	1.57	988 of 3988 (24.8%)	0.0423	1	macromolecule biosynthetic process	"The chemical reactions and pathways resulting in the formation of a macromolecule, any molecule of high relative molecular mass, the structure of which essentially comprises the multiple repetition of units derived, actually or conceptually, from molecules of low relative molecular mass." [CHEBI:33694, GOC:mah]	TBS1(YBR150C);SKN7(YHR206W);POL32(YJR043C);RAD27(YKL113C);RAD5(YLR032W);RIF2(YLR453C);ELG1(YOR144C);REV1(YOR346W);ACM1(YPL267W);RFC5(YBR087W);POL3(YDL102W);POL31(YJR006W);RPC37(YKR025W);RFC4(YOL094C)
GO:0044270	5 of 36 (13.9%)	1.95	2.56	216 of 3988 (5.4%)	0.0426	1	cellular nitrogen compound catabolic process	"The chemical reactions and pathways resulting in the breakdown of organic and inorganic nitrogenous compounds." [GOC:jl, ISBN:0198506732]	POL32(YJR043C);RAD27(YKL113C);STE6(YKL209C);POL3(YDL102W);POL31(YJR006W)
GO:0016567	3 of 36 (8.3%)	0.79	3.82	87 of 3988 (2.2%)	0.0427	1	protein ubiquitination	"The process in which one or more ubiquitin groups are added to a protein." [GOC:ai]	DAS1(YJL149W);RAD5(YLR032W);ACM1(YPL267W)
GO:0000724	2 of 36 (5.6%)	0.33	5.99	37 of 3988 (0.9%)	0.0433	1	double-strand break repair via homologous recombination	"The error-free repair of a double-strand break in DNA in which the broken DNA molecule is repaired using homologous sequences. A strand in the broken DNA searches for a homologous region in an intact chromosome to serve as the template for DNA synthesis. The restoration of two intact DNA molecules results in the exchange, reciprocal or nonreciprocal, of genetic material between the intact DNA mo…	POL32(YJR043C);ELG1(YOR144C)
GO:0046700	5 of 36 (13.9%)	1.96	2.55	217 of 3988 (5.4%)	0.0433	1	heterocycle catabolic process	"The chemical reactions and pathways resulting in the breakdown of heterocyclic compounds, those with a cyclic molecular structure and at least two different atoms in the ring (or rings)." [GOC:ai]	POL32(YJR043C);RAD27(YKL113C);STE6(YKL209C);POL3(YDL102W);POL31(YJR006W)
GO:0000160	1 of 36 (2.8%)	0.05	22.16	5 of 3988 (0.1%)	0.0443	1	phosphorelay signal transduction system	"A conserved series of molecular signals found in prokaryotes and eukaryotes; involves autophosphorylation of a histidine kinase and the transfer of the phosphate group to an aspartate that then acts as a phospho-donor to response regulator proteins." [PMID:9191038]	SKN7(YHR206W)
GO:0043619	1 of 36 (2.8%)	0.05	22.16	5 of 3988 (0.1%)	0.0443	1	regulation of transcription from RNA polymerase II promoter in response to oxidative stress	"Modulation of the frequency, rate or extent of transcription from an RNA polymerase II promoter as a result of a stimulus indicating the organism is under oxidative stress, a state often resulting from exposure to high levels of reactive oxygen species, e.g. superoxide anions, hydrogen peroxide (H2O2), and hydroxyl radicals." [GOC:jl]	SKN7(YHR206W)
GO:0051439	1 of 36 (2.8%)	0.05	22.16	5 of 3988 (0.1%)	0.0443	1	regulation of ubiquitin-protein ligase activity involved in mitotic cell cycle	"A cell cycle process that modulates the frequency, rate or extent of ubiquitin ligase activity that contributes to the mitotic cell cycle." [GOC:ai]	ACM1(YPL267W)
GO:0051601	1 of 36 (2.8%)	0.05	22.16	5 of 3988 (0.1%)	0.0443	1	exocyst localization	"Any process in which an exocyst is transported to, or maintained in, a specific location. An exocyst is a protein complex peripherally associated with the plasma membrane that determines where vesicles dock and fuse." [GOC:ai]	EXO70(YJL085W)
GO:1901361	5 of 36 (13.9%)	1.99	2.52	220 of 3988 (5.5%)	0.0455	1	organic cyclic compound catabolic process	"The chemical reactions and pathways resulting in the breakdown of organic cyclic compound." [GOC:TermGenie]	POL32(YJR043C);RAD27(YKL113C);STE6(YKL209C);POL3(YDL102W);POL31(YJR006W)
GO:0090304	15 of 36 (41.7%)	9.91	1.51	1098 of 3988 (27.5%)	0.0466	1	nucleic acid metabolic process	"Any cellular metabolic process involving nucleic acids." [GOC:dph, GOC:tb]	TBS1(YBR150C);SKN7(YHR206W);POL32(YJR043C);RAD27(YKL113C);RAD5(YLR032W);RIF2(YLR453C);PSO2(YMR137C);ELG1(YOR144C);REV1(YOR346W);ACM1(YPL267W);RFC5(YBR087W);POL3(YDL102W);POL31(YJR006W);RPC37(YKR025W);RFC4(YOL094C)
GO:1901700	2 of 36 (5.6%)	0.35	5.68	39 of 3988 (1.0%)	0.0476	1	response to oxygen-containing compound	"Any process that results in a change in state or activity of a cell or an organism (in terms of movement, secretion, enzyme production, gene expression, etc.) as a result of an oxygen-containing compound stimulus." [GOC:pr, GOC:TermGenie]	SKN7(YHR206W);YNL190W(YNL190W)
GO:0009056	10 of 36 (27.8%)	5.71	1.75	633 of 3988 (15.9%)	0.0485	1	catabolic process	"The chemical reactions and pathways resulting in the breakdown of substances, including the breakdown of carbon compounds with the liberation of energy for use by the cell or organism." [ISBN:0198547684]	GPD1(YDL022W);DAS1(YJL149W);POL32(YJR043C);RAD27(YKL113C);STE6(YKL209C);PLB2(YMR006C);POL3(YDL102W);TRS31(YDR472W);PUP3(YER094C);POL31(YJR006W)
GO:0046903	2 of 36 (5.6%)	0.36	5.54	40 of 3988 (1.0%)	0.0499	1	secretion	"The controlled release of a substance by a cell, a group of cells, or a tissue." [GOC:ai]	STE6(YKL209C);EXO70(YJL085W)
GO:0032940	2 of 36 (5.6%)	0.36	5.54	40 of 3988 (1.0%)	0.0499	1	secretion by cell	"The controlled release of a substance by a cell." [GOC:mah]	STE6(YKL209C);EXO70(YJL085W)
Depleted
GO:0010467	4 of 36 (11.1%)	9.82	0.41	1088 of 3988 (27.3%)	0.0168	1	gene expression	"The process in which a gene's sequence is converted into a mature gene product or products (proteins or RNA). This includes the production of an RNA transcript as well as any processing to produce a mature RNA product or an mRNA (for protein-coding genes) and the translation of that mRNA into protein. Some protein processing events may be included when they are required to form an active form of…	TBS1(YBR150C);SKN7(YHR206W);ACM1(YPL267W);RPC37(YKR025W)
GO:0044710	3 of 36 (8.3%)	8.02	0.37	888 of 3988 (22.3%)	0.0261	1	single-organism metabolic process	"A metabolic process - chemical reactions and pathways, including anabolism and catabolism, by which living organisms transform chemical substances - which involves a single organism." [GOC:jl]	GPD1(YDL022W);STE6(YKL209C);PLB2(YMR006C)
GO:0019538	4 of 36 (11.1%)	9.13	0.44	1011 of 3988 (25.4%)	0.0303	1	protein metabolic process	"The chemical reactions and pathways involving a specific protein, rather than of proteins in general. Includes protein modification." [GOC:ma]	DAS1(YJL149W);RAD5(YLR032W);ACM1(YPL267W);PUP3(YER094C)
GO:0006396	0 of 36 (0.0%)	3.20	0.00	354 of 3988 (8.9%)	0.0347	1	RNA processing	"Any process involved in the conversion of one or more primary RNA transcripts into one or more mature RNA molecules." [GOC:mah]
GO:0044267	4 of 36 (11.1%)	8.68	0.46	962 of 3988 (24.1%)	0.0432	1	cellular protein metabolic process	"The chemical reactions and pathways involving a specific protein, rather than of proteins in general, occurring at the level of an individual cell. Includes cellular protein modification." [GOC:jl]	DAS1(YJL149W);RAD5(YLR032W);ACM1(YPL267W);PUP3(YER094C)
MOLECULAR_FUNCTION
GO_term	set	expected	enrichment	background	p_fisher(1side)	fdr	Name	Description
GO:0004527	5 of 36 (13.9%)	0.23	21.30	26 of 3988 (0.7%)	2.58e-06	0.00168	exonuclease activity	"Catalysis of the hydrolysis of ester linkages within nucleic acids by removing nucleotide residues from the 3' or 5' end." [GOC:mah, ISBN:0198547684]	POL32(YJR043C);RAD27(YKL113C);PSO2(YMR137C);POL3(YDL102W);POL31(YJR006W)
GO:0008310	3 of 36 (8.3%)	0.04	83.08	4 of 3988 (0.1%)	2.69e-06	0.00168	single-stranded DNA specific 3'-5' exodeoxyribonuclease activity	"Catalysis of the sequential cleavage of mononucleotides from a free 3' terminus of a single-stranded DNA molecule." [GOC:mah]	POL32(YJR043C);POL3(YDL102W);POL31(YJR006W)
GO:0008297	3 of 36 (8.3%)	0.04	83.08	4 of 3988 (0.1%)	2.69e-06	0.00168	single-stranded DNA specific exodeoxyribonuclease activity	"Catalysis of the sequential cleavage of mononucleotides from a free 5' or 3' terminus of a single-stranded DNA molecule." [GOC:mah]	POL32(YJR043C);POL3(YDL102W);POL31(YJR006W)
GO:0003887	4 of 36 (11.1%)	0.14	29.54	15 of 3988 (0.4%)	7.12e-06	0.00268	DNA-directed DNA polymerase activity	"Catalysis of the reaction: deoxynucleoside triphosphate + DNA(n) = diphosphate + DNA(n+1); the synthesis of DNA from deoxyribonucleotide triphosphates in the presence of a DNA template and primer." [EC:2.7.7.7, ISBN:0198547684]	POL32(YJR043C);REV1(YOR346W);POL3(YDL102W);POL31(YJR006W)
GO:0034061	4 of 36 (11.1%)	0.14	29.54	15 of 3988 (0.4%)	7.12e-06	0.00268	DNA polymerase activity	"Catalysis of the reaction: deoxynucleoside triphosphate + DNA(n) = diphosphate + DNA(n+1); the synthesis of DNA from deoxyribonucleotide triphosphates in the presence of a nucleic acid template and primer." [EC:2.7.7.7, GOC:mah]	POL32(YJR043C);REV1(YOR346W);POL3(YDL102W);POL31(YJR006W)
GO:0008296	3 of 36 (8.3%)	0.05	55.39	6 of 3988 (0.2%)	1.33e-05	0.00416	3'-5'-exodeoxyribonuclease activity	"Catalysis of the sequential cleavage of mononucleotides from a free 3' terminus of a DNA molecule." [GOC:mah]	POL32(YJR043C);POL3(YDL102W);POL31(YJR006W)
GO:0016895	3 of 36 (8.3%)	0.06	47.48	7 of 3988 (0.2%)	2.31e-05	0.0062	exodeoxyribonuclease activity, producing 5'-phosphomonoesters	"Catalysis of the hydrolysis of ester linkages within deoxyribonucleic acids by removing nucleotide residues from the 3' or 5' end to yield 5' phosphomonoesters." [GOC:ai]	POL32(YJR043C);POL3(YDL102W);POL31(YJR006W)
GO:0004529	3 of 36 (8.3%)	0.07	41.54	8 of 3988 (0.2%)	3.67e-05	0.00863	exodeoxyribonuclease activity	"Catalysis of the sequential cleavage of mononucleotides from a free 5' or 3' terminus of a DNA molecule." [GOC:mah, ISBN:0198547684]	POL32(YJR043C);POL3(YDL102W);POL31(YJR006W)
GO:0016779	5 of 36 (13.9%)	0.45	11.08	50 of 3988 (1.3%)	7.11e-05	0.0137	nucleotidyltransferase activity	"Catalysis of the transfer of a nucleotidyl group to a reactant." [ISBN:0198506732]	POL32(YJR043C);REV1(YOR346W);POL3(YDL102W);POL31(YJR006W);RPC37(YKR025W)
GO:0004536	4 of 36 (11.1%)	0.23	17.04	26 of 3988 (0.7%)	7.26e-05	0.0137	deoxyribonuclease activity	"Catalysis of the hydrolysis of ester linkages within deoxyribonucleic acid." [GOC:mah, ISBN:0198547684]	POL32(YJR043C);RAD27(YKL113C);POL3(YDL102W);POL31(YJR006W)
GO:0003677	11 of 36 (30.6%)	3.42	3.22	379 of 3988 (9.5%)	0.000332	0.0469	DNA binding	"Any molecular function by which a gene product interacts selectively and non-covalently with DNA (deoxyribonucleic acid)." [GOC:dph, GOC:jl, GOC:tb, GOC:vw]	TBS1(YBR150C);SKN7(YHR206W);RAD27(YKL113C);RAD5(YLR032W);RIF2(YLR453C);PSO2(YMR137C);REV1(YOR346W);RFC5(YBR087W);POL3(YDL102W);POL31(YJR006W);RFC4(YOL094C)
GO:0004518	5 of 36 (13.9%)	0.62	8.03	69 of 3988 (1.7%)	0.000333	0.0469	nuclease activity	"Catalysis of the hydrolysis of ester linkages within nucleic acids." [ISBN:0198547684]	POL32(YJR043C);RAD27(YKL113C);PSO2(YMR137C);POL3(YDL102W);POL31(YJR006W)
GO:0008408	3 of 36 (8.3%)	0.14	20.77	16 of 3988 (0.4%)	0.000349	0.0469	3'-5' exonuclease activity	"Catalysis of the hydrolysis of ester linkages within nucleic acids by removing nucleotide residues from the 3' end." [GOC:ai]	POL32(YJR043C);POL3(YDL102W);POL31(YJR006W)
GO:0016796	3 of 36 (8.3%)	0.14	20.77	16 of 3988 (0.4%)	0.000349	0.0469	exonuclease activity, active with either ribo- or deoxyribonucleic acids and producing 5'-phosphomonoesters	"Catalysis of the hydrolysis of ester linkages within nucleic acids by removing nucleotide residues from the 3' or 5' end to yield 5' phosphomonoesters." [GOC:mah]	POL32(YJR043C);POL3(YDL102W);POL31(YJR006W)
GO:0003689	2 of 36 (5.6%)	0.04	55.39	4 of 3988 (0.1%)	0.00047	0.0553	DNA clamp loader activity	"Catalysis of the reaction: ATP + H2O = ADP + phosphate, to drive the opening of the ring structure of the PCNA complex, or any of the related sliding clamp complexes, and their closing around the DNA duplex." [GOC:mah, GOC:vw, PMID:16082778]	RFC5(YBR087W);RFC4(YOL094C)
GO:0033170	2 of 36 (5.6%)	0.04	55.39	4 of 3988 (0.1%)	0.00047	0.0553	protein-DNA loading ATPase activity	"Catalysis of the reaction: ATP + H2O = ADP + phosphate, to drive the assembly of a protein or protein complex onto a DNA molecule." [GOC:mah, GOC:vw]	RFC5(YBR087W);RFC4(YOL094C)
GO:0008409	2 of 36 (5.6%)	0.05	44.31	5 of 3988 (0.1%)	0.000779	0.0862	5'-3' exonuclease activity	"Catalysis of the hydrolysis of ester linkages within nucleic acids by removing nucleotide residues from the 5' end." [GOC:ai]	RAD27(YKL113C);PSO2(YMR137C)
GO:0008094	3 of 36 (8.3%)	0.42	7.22	46 of 3988 (1.2%)	0.00786	0.772	DNA-dependent ATPase activity	"Catalysis of the reaction: ATP + H2O = ADP + phosphate; this reaction requires the presence of single- or double-stranded DNA, and it drives another reaction." [EC:3.6.1.3, GOC:jl]	RAD5(YLR032W);RFC5(YBR087W);RFC4(YOL094C)
GO:0017125	1 of 36 (2.8%)	0.01	110.78	1 of 3988 (0.0%)	0.00903	0.772	deoxycytidyl transferase activity	"Catalysis of the insertion of a dCMP residue opposite a template abasic site in DNA." [PMID:10535901]	REV1(YOR346W)
GO:0055105	1 of 36 (2.8%)	0.01	110.78	1 of 3988 (0.0%)	0.00903	0.772	ubiquitin-protein ligase inhibitor activity	"Stops, prevents or reduces the activity of a ubiquitin-protein ligase." [GOC:BHF, GOC:rl]	ACM1(YPL267W)
GO:0055104	1 of 36 (2.8%)	0.01	110.78	1 of 3988 (0.0%)	0.00903	0.772	ligase inhibitor activity	"Stops, prevents or reduces the activity of a ligase." [GOC:BHF, GOC:rl]	ACM1(YPL267W)
GO:0061133	1 of 36 (2.8%)	0.01	110.78	1 of 3988 (0.0%)	0.00903	0.772	endopeptidase activator activity	"Increases the activity of an endopeptidase, any enzyme that hydrolyzes nonterminal peptide bonds in polypeptides." [GOC:dph, GOC:tb]	PUP3(YER094C)
GO:0016788	6 of 36 (16.7%)	1.87	3.21	207 of 3988 (5.2%)	0.00958	0.784	hydrolase activity, acting on ester bonds	"Catalysis of the hydrolysis of any ester bond." [GOC:jl]	POL32(YJR043C);RAD27(YKL113C);PLB2(YMR006C);PSO2(YMR137C);POL3(YDL102W);POL31(YJR006W)
GO:0003676	12 of 36 (33.3%)	6.26	1.92	694 of 3988 (17.4%)	0.0151	1	nucleic acid binding	"Interacting selectively and non-covalently with any nucleic acid." [GOC:jl]	TBS1(YBR150C);YGR001C(YGR001C);SKN7(YHR206W);RAD27(YKL113C);RAD5(YLR032W);RIF2(YLR453C);PSO2(YMR137C);REV1(YOR346W);RFC5(YBR087W);POL3(YDL102W);POL31(YJR006W);RFC4(YOL094C)
GO:0003684	2 of 36 (5.6%)	0.20	10.07	22 of 3988 (0.6%)	0.0163	1	damaged DNA binding	"Interacting selectively and non-covalently with damaged DNA." [GOC:jl]	PSO2(YMR137C);REV1(YOR346W)
GO:0004367	1 of 36 (2.8%)	0.02	55.39	2 of 3988 (0.1%)	0.018	1	glycerol-3-phosphate dehydrogenase [NAD+] activity	"Catalysis of the reaction: sn-glycerol 3-phosphate + NAD+ = glycerone phosphate + NADH + H+." [EC:1.1.1.8]	GPD1(YDL022W)
GO:0004622	1 of 36 (2.8%)	0.02	55.39	2 of 3988 (0.1%)	0.018	1	lysophospholipase activity	"Catalysis of the reaction: 2-lysophosphatidylcholine + H2O = glycerophosphocholine + a carboxylate." [EC:3.1.1.5]	PLB2(YMR006C)
GO:0016504	1 of 36 (2.8%)	0.02	55.39	2 of 3988 (0.1%)	0.018	1	peptidase activator activity	"Increases the activity of a peptidase, any enzyme that catalyzes the hydrolysis peptide bonds." [GOC:ai]	PUP3(YER094C)
GO:0017049	1 of 36 (2.8%)	0.02	55.39	2 of 3988 (0.1%)	0.018	1	GTP-Rho binding	"Interacting selectively and non-covalently with the GTP-bound form of the Rho protein." [GOC:mah]	EXO70(YJL085W)
GO:0016787	11 of 36 (30.6%)	5.89	1.87	653 of 3988 (16.4%)	0.0247	1	hydrolase activity	"Catalysis of the hydrolysis of various bonds, e.g. C-O, C-N, C-C, phosphoric anhydride bonds, etc. Hydrolase is the systematic name for any enzyme of EC class 3." [ISBN:0198506732]	POL32(YJR043C);RAD27(YKL113C);STE6(YKL209C);RAD5(YLR032W);PLB2(YMR006C);PSO2(YMR137C);RFC5(YBR087W);POL3(YDL102W);PUP3(YER094C);POL31(YJR006W);RFC4(YOL094C)
GO:0015095	1 of 36 (2.8%)	0.03	36.93	3 of 3988 (0.1%)	0.0268	1	magnesium ion transmembrane transporter activity	"Catalysis of the transfer of magnesium (Mg) ions from one side of a membrane to the other." [GOC:dgf]	MNR2(YKL064W)
GO:0015440	1 of 36 (2.8%)	0.03	36.93	3 of 3988 (0.1%)	0.0268	1	peptide-transporting ATPase activity	"Catalysis of the reaction: ATP + H2O + peptide(in) = ADP + phosphate + peptide(out). Peptides exported include alpha-hemolysin, cyclolysin, colicin V and siderophores from Gram-negative bacteria, and bacteriocin, subtilin, competence factor and pediocin from Gram-positive bacteria." [EC:3.6.3.43]	STE6(YKL209C)
GO:0009378	1 of 36 (2.8%)	0.03	36.93	3 of 3988 (0.1%)	0.0268	1	four-way junction helicase activity	"Catalysis of the unwinding of the DNA helix of DNA containing four-way junctions, including Holliday junctions." [GOC:jl, PMID:9442895]	RAD5(YLR032W)
GO:0000403	1 of 36 (2.8%)	0.03	36.93	3 of 3988 (0.1%)	0.0268	1	Y-form DNA binding	"Interacting selectively and non-covalently with segment of DNA shaped like a Y. This shape occurs when DNA contains a region of paired double-stranded DNA on one end and a region of unpaired DNA strands on the opposite end." [GOC:elh, PMID:16781730]	RAD5(YLR032W)
GO:0042623	4 of 36 (11.1%)	1.16	3.43	129 of 3988 (3.2%)	0.0276	1	ATPase activity, coupled	"Catalysis of the reaction: ATP + H2O = ADP + phosphate; this reaction directly drives some other reaction, for example ion transport across a membrane." [EC:3.6.1.3, GOC:jl]	STE6(YKL209C);RAD5(YLR032W);RFC5(YBR087W);RFC4(YOL094C)
GO:0000156	1 of 36 (2.8%)	0.04	27.69	4 of 3988 (0.1%)	0.0356	1	phosphorelay response regulator activity	"Responds to a phosphorelay sensor to initiate a change in cell state or activity. The activity of the response regulator is regulated by transfer of a phosphate from a histidine residue in the sensor, to an aspartate residue in the response regulator. Many but not all response regulators act as transcriptional regulators to elicit a response." [GOC:bf, PMID:10966457, PMID:11842140]	SKN7(YHR206W)
GO:0055106	1 of 36 (2.8%)	0.04	27.69	4 of 3988 (0.1%)	0.0356	1	ubiquitin-protein ligase regulator activity	"Modulates the activity of a ubiquitin-protein ligase, an enzyme that catalyzes the covalent attachment of ubiquitin to lysine in a substrate protein." [GOC:BHF, GOC:rl]	ACM1(YPL267W)
GO:0055103	1 of 36 (2.8%)	0.04	27.69	4 of 3988 (0.1%)	0.0356	1	ligase regulator activity	"Modulates the activity of a ligase." [GOC:BHF, GOC:rl]	ACM1(YPL267W)
GO:0061135	1 of 36 (2.8%)	0.04	27.69	4 of 3988 (0.1%)	0.0356	1	endopeptidase regulator activity	"Modulates the activity of a peptidase, any enzyme that hydrolyzes nonterminal peptide bonds in polypeptides." [GOC:dph, GOC:tb]	PUP3(YER094C)
GO:0017048	1 of 36 (2.8%)	0.04	27.69	4 of 3988 (0.1%)	0.0356	1	Rho GTPase binding	"Interacting selectively and non-covalently with Rho protein, any member of the Rho subfamily of the Ras superfamily of monomeric GTPases. Proteins in the Rho subfamily are involved in relaying signals from cell-surface receptors to the actin cytoskeleton." [ISBN:0198547684, PMID:12581856]	EXO70(YJL085W)
GO:0017108	1 of 36 (2.8%)	0.05	22.16	5 of 3988 (0.1%)	0.0443	1	5'-flap endonuclease activity	"Catalysis of the cleavage of a 5' flap structure in DNA, but not other DNA structures; processes the 5' ends of Okazaki fragments in lagging strand DNA synthesis." [PMID:9778254]	RAD27(YKL113C)
GO:0048256	1 of 36 (2.8%)	0.05	22.16	5 of 3988 (0.1%)	0.0443	1	flap endonuclease activity	"Catalysis of the cleavage of a flap structure in DNA, but not other DNA structures; processes the ends of Okazaki fragments in lagging strand DNA synthesis." [GOC:jid]	RAD27(YKL113C)
GO:0032934	1 of 36 (2.8%)	0.05	22.16	5 of 3988 (0.1%)	0.0443	1	sterol binding	"Interacting selectively and non-covalently with a sterol, any steroid containing a hydroxy group in the 3 position, closely related to cholestan-3-ol." [CHEBI:15889, GOC:mah]	PRY2(YKR013W)
GO:0005496	1 of 36 (2.8%)	0.05	22.16	5 of 3988 (0.1%)	0.0443	1	steroid binding	"Interacting selectively and non-covalently with a steroid, any of a large group of substances that have in common a ring system based on 1,2-cyclopentanoperhydrophenanthrene." [GOC:jl, ISBN:0198506732]	PRY2(YKR013W)
GO:0000400	1 of 36 (2.8%)	0.05	22.16	5 of 3988 (0.1%)	0.0443	1	four-way junction DNA binding	"Interacting selectively and non-covalently with DNA containing four-way junctions, also known as Holliday junctions, a structure where two DNA double strands are held together by reciprocal exchange of two of the four strands, one strand each from the two original helices." [GOC:krc, ISBN:0815332181, PMID:15563464]	RAD5(YLR032W)
GO:0004620	1 of 36 (2.8%)	0.05	22.16	5 of 3988 (0.1%)	0.0443	1	phospholipase activity	"Catalysis of the hydrolysis of a glycerophospholipid." [ISBN:0198506732]	PLB2(YMR006C)
GO:0061134	1 of 36 (2.8%)	0.05	22.16	5 of 3988 (0.1%)	0.0443	1	peptidase regulator activity	"Modulates the activity of a peptidase, any enzyme that catalyzes the hydrolysis peptide bonds." [GOC:dph, GOC:tb]	PUP3(YER094C)
CELLULAR_COMPONENT
GO_term	set	expected	enrichment	background	p_fisher(1side)	fdr	Name	Description
GO:0043625	3 of 36 (8.3%)	0.03	110.78	3 of 3988 (0.1%)	6.76e-07	0.000491	delta DNA polymerase complex	"A multimeric DNA polymerase enzyme complex which differs in composition amongst species; in humans it is a heterotetramer of four subunits of approximately 125, 50, 68 and 12kDa, while in S. cerevisiae, it has three different subunits which form a heterotrimer, and the active enzyme is a dimer of this heterotrimer. Functions in DNA replication, mismatch repair and excision repair." [GOC:jl, ISBN…	POL32(YJR043C);POL3(YDL102W);POL31(YJR006W)
GO:0005657	6 of 36 (16.7%)	0.37	16.21	41 of 3988 (1.0%)	1.25e-06	0.000491	replication fork	"The Y-shaped region of a replicating DNA molecule, resulting from the separation of the DNA strands and in which the synthesis of new strands takes place. Also includes associated protein complexes." [GOC:mah, ISBN:0198547684]	POL32(YJR043C);REV1(YOR346W);RFC5(YBR087W);POL3(YDL102W);POL31(YJR006W);RFC4(YOL094C)
GO:0031391	3 of 36 (8.3%)	0.04	83.08	4 of 3988 (0.1%)	2.69e-06	0.000702	Elg1 RFC-like complex	"A pentameric complex related to replication factor C, which loads the DNA polymerase processivity factor proliferating cell nuclear antigen (PCNA) onto DNA and has roles in telomere length regulation and other aspects of genome stability. In Saccharomyces the subunits are known as Elg1p, Rfc2p, Rfc3p, Rfc4p, and Rfc5p." [PMID:14614842]	ELG1(YOR144C);RFC5(YBR087W);RFC4(YOL094C)
GO:0042575	3 of 36 (8.3%)	0.07	41.54	8 of 3988 (0.2%)	3.67e-05	0.00719	DNA polymerase complex	"A protein complex that possesses DNA polymerase activity and is involved in template directed synthesis of DNA." [GOC:jl, PMID:12045093]	POL32(YJR043C);POL3(YDL102W);POL31(YJR006W)
GO:0044427	10 of 36 (27.8%)	2.34	4.28	259 of 3988 (6.5%)	6.31e-05	0.0099	chromosomal part	"Any constituent part of a chromosome, a structure composed of a very long molecule of DNA and associated proteins (e.g. histones) that carries hereditary information." [GOC:jl]	LIN1(YHR156C);POL32(YJR043C);RAD5(YLR032W);RIF2(YLR453C);ELG1(YOR144C);REV1(YOR346W);RFC5(YBR087W);POL3(YDL102W);POL31(YJR006W);RFC4(YOL094C)
GO:0005694	10 of 36 (27.8%)	2.56	3.90	284 of 3988 (7.1%)	0.000138	0.018	chromosome	"A structure composed of a very long molecule of DNA and associated proteins (e.g. histones) that carries hereditary information." [ISBN:0198547684]	LIN1(YHR156C);POL32(YJR043C);RAD5(YLR032W);RIF2(YLR453C);ELG1(YOR144C);REV1(YOR346W);RFC5(YBR087W);POL3(YDL102W);POL31(YJR006W);RFC4(YOL094C)
GO:0043601	3 of 36 (8.3%)	0.13	23.74	14 of 3988 (0.4%)	0.00023	0.0206	nuclear replisome	"A multi-component enzymatic machine at the nuclear replication fork, which mediates DNA replication. Includes DNA primase, one or more DNA polymerases, DNA helicases, and other proteins." [GOC:jl, GOC:mtg_sensu]	POL32(YJR043C);POL3(YDL102W);POL31(YJR006W)
GO:0030894	3 of 36 (8.3%)	0.13	23.74	14 of 3988 (0.4%)	0.00023	0.0206	replisome	"A multi-component enzymatic machine at the replication fork which mediates DNA replication. Includes DNA primase, one or more DNA polymerases, DNA helicases, and other proteins." [GOC:mah, GOC:vw]	POL32(YJR043C);POL3(YDL102W);POL31(YJR006W)
GO:0005663	2 of 36 (5.6%)	0.03	73.85	3 of 3988 (0.1%)	0.000236	0.0206	DNA replication factor C complex	"A complex of five polypeptides in eukaryotes, and two in prokaryotes, that loads the DNA polymerase processivity factor proliferating cell nuclear antigen (PCNA) onto DNA, thereby permitting processive DNA synthesis catalyzed by DNA polymerase." [PMID:14614842, PMID:14646196, PMID:16172520]	RFC5(YBR087W);RFC4(YOL094C)
GO:0031389	2 of 36 (5.6%)	0.04	55.39	4 of 3988 (0.1%)	0.00047	0.0369	Rad17 RFC-like complex	"A pentameric protein complex related to replication factor C, which loads a trimeric complex of checkpoint proteins (known as the checkpoint clamp or 9-1-1 complex) onto DNA at damage sites; functions in DNA damage cell cycle checkpoints. In Schizosaccharomyces pombe the subunits are known as Rad17, Rfc2, Rfc3, Rfc4, and Rfc5, while in Saccharomyces cerevisiae the subunits are known as Rad24p, R…	RFC5(YBR087W);RFC4(YOL094C)
GO:0032993	4 of 36 (11.1%)	0.40	10.07	44 of 3988 (1.1%)	0.000587	0.0419	protein-DNA complex	"A macromolecular complex containing both protein and DNA molecules." [GOC:mah]	POL32(YJR043C);RIF2(YLR453C);POL3(YDL102W);POL31(YJR006W)
GO:0031390	2 of 36 (5.6%)	0.05	36.93	6 of 3988 (0.2%)	0.00116	0.0759	Ctf18 RFC-like complex	"A heptameric complex related to replication factor C, which loads the DNA polymerase processivity factor proliferating cell nuclear antigen (PCNA) onto DNA and plays a vital role in chromosome cohesion. In Saccharomyces the subunits are known as Ctf18p, Rfc2p, Rfc3p, Rfc4p, Rfc5p, Dcc1p, and Ctf8p." [PMID:14614842]	RFC5(YBR087W);RFC4(YOL094C)
GO:0043596	3 of 36 (8.3%)	0.32	9.50	35 of 3988 (0.9%)	0.00363	0.219	nuclear replication fork	"The Y-shaped region of a nuclear replicating DNA molecule, resulting from the separation of the DNA strands and in which the synthesis of new strands takes place. Also includes associated protein complexes." [GOC:jl, GOC:mtg_sensu]	POL32(YJR043C);POL3(YDL102W);POL31(YJR006W)
GO:0044454	6 of 36 (16.7%)	1.80	3.34	199 of 3988 (5.0%)	0.00795	0.445	nuclear chromosome part	"Any constituent part of a nuclear chromosome, a chromosome found in the nucleus of a eukaryotic cell." [GOC:jl]	POL32(YJR043C);RAD5(YLR032W);RIF2(YLR453C);REV1(YOR346W);POL3(YDL102W);POL31(YJR006W)
GO:0000228	6 of 36 (16.7%)	1.98	3.04	219 of 3988 (5.5%)	0.0125	0.652	nuclear chromosome	"A chromosome found in the nucleus of a eukaryotic cell." [GOC:mah]	POL32(YJR043C);RAD5(YLR032W);RIF2(YLR453C);REV1(YOR346W);POL3(YDL102W);POL31(YJR006W)
GO:0005576	3 of 36 (8.3%)	0.55	5.45	61 of 3988 (1.5%)	0.017	0.833	extracellular region	"The space external to the outermost structure of a cell. For cells without external protective or external encapsulating structures this refers to space outside of the plasma membrane. This term covers the host cell environment outside an intracellular parasite." [GOC:go_curators]	PAU24(YBR301W);PRY2(YKR013W);PLB2(YMR006C)
GO:0009277	3 of 36 (8.3%)	0.57	5.28	63 of 3988 (1.6%)	0.0185	0.854	fungal-type cell wall	"A rigid yet dynamic structure surrounding the plasma membrane that affords protection from stresses and contributes to cell morphogenesis, consisting of extensively cross-linked glycoproteins and carbohydrates. The glycoproteins may be modified with N- or O-linked carbohydrates, or glycosylphosphatidylinositol (GPI) anchors; the polysaccharides are primarily branched glucans, including beta-link…	PAU24(YBR301W);PLB2(YMR006C);YNL190W(YNL190W)
GO:0005618	3 of 36 (8.3%)	0.60	5.04	66 of 3988 (1.7%)	0.0209	0.864	cell wall	"The rigid or semi-rigid envelope lying outside the cell membrane of plant, fungal, and most prokaryotic cells, maintaining their shape and protecting them from osmotic lysis. In plants it is made of cellulose and, often, lignin; in fungi it is composed largely of polysaccharides; in bacteria it is composed of peptidoglycan." [ISBN:0198547684]	PAU24(YBR301W);PLB2(YMR006C);YNL190W(YNL190W)
GO:0030312	3 of 36 (8.3%)	0.60	5.04	66 of 3988 (1.7%)	0.0209	0.864	external encapsulating structure	"A structure that lies outside the plasma membrane and surrounds the entire cell." [GOC:go_curators]	PAU24(YBR301W);PLB2(YMR006C);YNL190W(YNL190W)
GO:0009331	1 of 36 (2.8%)	0.03	36.93	3 of 3988 (0.1%)	0.0268	1	glycerol-3-phosphate dehydrogenase complex	"An enzyme complex that catalyzes the dehydrogenation of sn-glycerol 3-phosphate to form glycerone phosphate." [EC:1.1.5.3]	GPD1(YDL022W)
GO:0043332	3 of 36 (8.3%)	0.70	4.32	77 of 3988 (1.9%)	0.0313	1	mating projection tip	"The apex of the mating projection in unicellular fungi exposed to mating pheromone; site of polarized growth." [GOC:mcc]	STE6(YKL209C);YMR295C(YMR295C);EXO70(YJL085W)
GO:0044463	3 of 36 (8.3%)	0.72	4.15	80 of 3988 (2.0%)	0.0345	1	cell projection part	"Any constituent part of a cell projection, a prolongation or process extending from a cell, e.g. a flagellum or axon." [GOC:jl]	STE6(YKL209C);YMR295C(YMR295C);EXO70(YJL085W)
GO:0000781	2 of 36 (5.6%)	0.30	6.71	33 of 3988 (0.8%)	0.0351	1	chromosome, telomeric region	"The terminal region of a linear chromosome that includes the telomeric DNA repeats and associated proteins." [GOC:elh]	RIF2(YLR453C);ELG1(YOR144C)
GO:0019774	1 of 36 (2.8%)	0.04	27.69	4 of 3988 (0.1%)	0.0356	1	proteasome core complex, beta-subunit complex	"The proteasome core subcomplex that constitutes the two inner rings of the proteasome core complex. An example of this component is found in Mus musculus." [GOC:jl, GOC:mtg_sensu, GOC:rb, PMID:10854779]	PUP3(YER094C)
GO:0005937	3 of 36 (8.3%)	0.79	3.82	87 of 3988 (2.2%)	0.0427	1	mating projection	"The projection formed by unicellular fungi in response to mating pheromone." [GOC:mcc]	STE6(YKL209C);YMR295C(YMR295C);EXO70(YJL085W)
GO:0042995	3 of 36 (8.3%)	0.79	3.82	87 of 3988 (2.2%)	0.0427	1	cell projection	"A prolongation or process extending from a cell, e.g. a flagellum or axon." [GOC:jl, http://www.cogsci.princeton.edu/~wn/]	STE6(YKL209C);YMR295C(YMR295C);EXO70(YJL085W)
GO:0005634	19 of 36 (52.8%)	13.53	1.40	1499 of 3988 (37.6%)	0.0447	1	nucleus	"A membrane-bounded organelle of eukaryotic cells in which chromosomes are housed and replicated. In most cells, the nucleus contains all of the cell's chromosomes except the organellar chromosomes, and is the site of RNA synthesis and processing. In some species, or in specialized cell types, RNA metabolism or DNA replication may be absent." [GOC:go_curators]	TBS1(YBR150C);GPD1(YDL022W);LIN1(YHR156C);SKN7(YHR206W);POL32(YJR043C);RAD27(YKL113C);RAD5(YLR032W);RIF2(YLR453C);YML108W(YML108W);PSO2(YMR137C);ELG1(YOR144C);REV1(YOR346W);ACM1(YPL267W);RFC5(YBR087W);POL3(YDL102W);PUP3(YER094C);POL31(YJR006W);RPC37(YKR025W);RFC4(YOL094C)

## Sheet: Randomization 2
BIOLOGICAL_PROCESS
GO_term	set	expected	enrichment	background	p_fisher(1side)	fdr	Name	Description
GO:0006260	9 of 36 (25.0%)	1.04	8.67	115 of 3988 (2.9%)	4.94e-07	0.00133	DNA replication	"The cellular metabolic process in which a cell duplicates one or more molecules of DNA. DNA replication begins when specific sequences, known as origins of replication, are recognized and bound by initiation proteins, and ends when the original DNA molecule has been completely duplicated and the copies topologically separated. The unit of replication usually corresponds to the genome of the cell…	POL32(YJR043C);RAD27(YKL113C);RIF2(YLR453C);ELG1(YOR144C);REV1(YOR346W);RFC5(YBR087W);CDC28(YBR160W);POL31(YJR006W);RFC4(YOL094C)
GO:0006272	4 of 36 (11.1%)	0.08	49.23	9 of 3988 (0.2%)	6.83e-07	0.00133	leading strand elongation	"The synthesis of DNA from a template strand in the 5' to 3' direction; leading strand elongation is continuous as it proceeds in the same direction as the replication fork." [ISBN:071673706X, ISBN:0815316194]	POL32(YJR043C);RFC5(YBR087W);POL31(YJR006W);RFC4(YOL094C)
GO:0006271	5 of 36 (13.9%)	0.22	23.08	24 of 3988 (0.6%)	1.69e-06	0.00204	DNA strand elongation involved in DNA replication	"The process in which a DNA strand is synthesized from template DNA during replication by the action of polymerases, which add nucleotides to the 3' end of the nascent DNA strand." [ISBN:071673706X, ISBN:0815316194]	POL32(YJR043C);RAD27(YKL113C);RFC5(YBR087W);POL31(YJR006W);RFC4(YOL094C)
GO:0022616	5 of 36 (13.9%)	0.23	22.16	25 of 3988 (0.6%)	2.1e-06	0.00204	DNA strand elongation	"The DNA metabolic process in which a DNA strand is synthesized by adding nucleotides to the 3' end of an existing DNA stand." [GOC:isa_complete]	POL32(YJR043C);RAD27(YKL113C);RFC5(YBR087W);POL31(YJR006W);RFC4(YOL094C)
GO:0006281	10 of 36 (27.8%)	1.78	5.62	197 of 3988 (4.9%)	5.68e-06	0.00436	DNA repair	"The process of restoring DNA after damage. Genomes are subject to damage by chemical and physical agents in the environment (e.g. UV and ionizing radiations, chemical mutagens, fungal and bacterial toxins, etc.) and by free radicals or alkylating agents endogenously generated in metabolism. DNA is also damaged because of errors during its replication. A variety of different DNA repair pathways h…	POL32(YJR043C);RAD27(YKL113C);RAD5(YLR032W);PSO2(YMR137C);ELG1(YOR144C);REV1(YOR346W);RFC5(YBR087W);CDC28(YBR160W);POL31(YJR006W);RFC4(YOL094C)
GO:0006261	7 of 36 (19.4%)	0.75	9.34	83 of 3988 (2.1%)	6.72e-06	0.00436	DNA-dependent DNA replication	"A DNA replication process that uses parental DNA as a template for the DNA-dependent DNA polymerases that synthesize the new strands." [GOC:mah, ISBN:0198506732]	POL32(YJR043C);RAD27(YKL113C);ELG1(YOR144C);RFC5(YBR087W);CDC28(YBR160W);POL31(YJR006W);RFC4(YOL094C)
GO:0006298	4 of 36 (11.1%)	0.15	26.07	17 of 3988 (0.4%)	1.23e-05	0.00682	mismatch repair	"A system for the correction of errors in which an incorrect base, which cannot form hydrogen bonds with the corresponding base in the parent strand, is incorporated into the daughter strand. The mismatch repair system promotes genomic fidelity by repairing base-base mismatches, insertion-deletion loops and heterologies generated during DNA replication and recombination." [ISBN:0198506732, PMID:1…	POL32(YJR043C);RFC5(YBR087W);POL31(YJR006W);RFC4(YOL094C)
GO:0006974	10 of 36 (27.8%)	2.07	4.84	229 of 3988 (5.7%)	2.17e-05	0.00999	response to DNA damage stimulus	"Any process that results in a change in state or activity of a cell (in terms of movement, secretion, enzyme production, gene expression, etc.) as a result of a stimulus indicating damage to its DNA from environmental insults or errors during metabolism." [GOC:go_curators]	POL32(YJR043C);RAD27(YKL113C);RAD5(YLR032W);PSO2(YMR137C);ELG1(YOR144C);REV1(YOR346W);RFC5(YBR087W);CDC28(YBR160W);POL31(YJR006W);RFC4(YOL094C)
GO:0043137	3 of 36 (8.3%)	0.06	47.48	7 of 3988 (0.2%)	2.31e-05	0.00999	DNA replication, removal of RNA primer	"Removal of the Okazaki RNA primer from the lagging strand of replicating DNA, by a combination of the actions of DNA polymerase, DNA helicase and an endonuclease." [GOC:jl, PMID:12424238]	POL32(YJR043C);RAD27(YKL113C);POL31(YJR006W)
GO:0006302	6 of 36 (16.7%)	0.66	9.11	73 of 3988 (1.8%)	3.85e-05	0.0143	double-strand break repair	"The repair of double-strand breaks in DNA via homologous and nonhomologous mechanisms to reform a continuous DNA helix." [GOC:elh]	POL32(YJR043C);RAD27(YKL113C);RAD5(YLR032W);PSO2(YMR137C);ELG1(YOR144C);CDC28(YBR160W)
GO:0006301	4 of 36 (11.1%)	0.21	19.27	23 of 3988 (0.6%)	4.39e-05	0.0143	postreplication repair	"The conversion of DNA-damage induced single-stranded gaps into large molecular weight DNA after replication. Includes pathways that remove replication-blocking lesions in conjunction with DNA replication." [GOC:elh]	POL32(YJR043C);RAD5(YLR032W);REV1(YOR346W);POL31(YJR006W)
GO:0033554	13 of 36 (36.1%)	3.84	3.39	425 of 3988 (10.7%)	4.41e-05	0.0143	cellular response to stress	"Any process that results in a change in state or activity of a cell (in terms of movement, secretion, enzyme production, gene expression, etc.) as a result of a stimulus indicating the organism is under stress. The stress is usually, but not necessarily, exogenous (e.g. temperature, humidity, ionizing radiation)." [GOC:mah]	GPD1(YDL022W);SKN7(YHR206W);POL32(YJR043C);RAD27(YKL113C);RAD5(YLR032W);PSO2(YMR137C);YNL190W(YNL190W);ELG1(YOR144C);REV1(YOR346W);RFC5(YBR087W);CDC28(YBR160W);POL31(YJR006W);RFC4(YOL094C)
GO:0033567	3 of 36 (8.3%)	0.08	36.93	9 of 3988 (0.2%)	5.47e-05	0.0164	DNA replication, Okazaki fragment processing	"The DNA metabolic process, occurring during lagging strand synthesis, by which RNA primers are removed from Okazaki fragments, the resulting gaps filled by DNA polymerization, and the ends ligated to form a continuous strand." [GOC:mah, ISBN:0716720094]	POL32(YJR043C);RAD27(YKL113C);POL31(YJR006W)
GO:0006259	11 of 36 (30.6%)	3.10	3.55	343 of 3988 (8.6%)	0.000136	0.0379	DNA metabolic process	"Any cellular metabolic process involving deoxyribonucleic acid. This is one of the two main types of nucleic acid, consisting of a long, unbranched macromolecule formed from one, or more commonly, two, strands of linked deoxyribonucleotides." [ISBN:0198506732]	POL32(YJR043C);RAD27(YKL113C);RAD5(YLR032W);RIF2(YLR453C);PSO2(YMR137C);ELG1(YOR144C);REV1(YOR346W);RFC5(YBR087W);CDC28(YBR160W);POL31(YJR006W);RFC4(YOL094C)
GO:0006950	14 of 36 (38.9%)	4.98	2.81	552 of 3988 (13.8%)	0.000162	0.0417	response to stress	"Any process that results in a change in state or activity of a cell or an organism (in terms of movement, secretion, enzyme production, gene expression, etc.) as a result of a disturbance in organismal or cellular homeostasis, usually, but not necessarily, exogenous (e.g. temperature, humidity, ionizing radiation)." [GOC:mah]	PAU24(YBR301W);GPD1(YDL022W);SKN7(YHR206W);POL32(YJR043C);RAD27(YKL113C);RAD5(YLR032W);PSO2(YMR137C);YNL190W(YNL190W);ELG1(YOR144C);REV1(YOR346W);RFC5(YBR087W);CDC28(YBR160W);POL31(YJR006W);RFC4(YOL094C)
GO:0006273	3 of 36 (8.3%)	0.12	25.56	13 of 3988 (0.3%)	0.000182	0.0417	lagging strand elongation	"The synthesis of DNA from a template strand in a net 3' to 5' direction. Lagging strand DNA elongation proceeds by discontinuous synthesis of short stretches of DNA, known as Okazaki fragments, from RNA primers; these fragments are then joined by DNA ligase. Although each segment of nascent DNA is synthesized in the 5' to 3' direction, the overall direction of lagging strand synthesis is 3' to 5…	POL32(YJR043C);RAD27(YKL113C);POL31(YJR006W)
GO:0006284	3 of 36 (8.3%)	0.12	25.56	13 of 3988 (0.3%)	0.000182	0.0417	base-excision repair	"In base excision repair, an altered base is removed by a DNA glycosylase enzyme, followed by excision of the resulting sugar phosphate. The small gap left in the DNA helix is filled in by the sequential action of DNA polymerase and DNA ligase." [ISBN:0815316194]	POL32(YJR043C);RAD27(YKL113C);POL31(YJR006W)
GO:0071897	3 of 36 (8.3%)	0.14	22.16	15 of 3988 (0.4%)	0.000285	0.0618	DNA biosynthetic process	"The cellular DNA metabolic process resulting in the formation of DNA, deoxyribonucleic acid, one of the two main types of nucleic acid, consisting of a long unbranched macromolecule formed from one or two strands of linked deoxyribonucleotides, the 3'-phosphate group of each constituent deoxyribonucleotide being joined in 3',5'-phosphodiester linkage to the 5'-hydroxyl group of the deoxyribose m…	RAD27(YKL113C);RAD5(YLR032W);REV1(YOR346W)
GO:0006278	3 of 36 (8.3%)	0.15	19.55	17 of 3988 (0.4%)	0.000421	0.0864	RNA-dependent DNA replication	"A DNA replication process that uses RNA as a template for RNA-dependent DNA polymerases (e.g. reverse transcriptase) that synthesize the new strands." [GOC:mah, ISBN:0198506732]	POL32(YJR043C);RIF2(YLR453C);POL31(YJR006W)
GO:0007062	4 of 36 (11.1%)	0.37	10.81	41 of 3988 (1.0%)	0.000447	0.0871	sister chromatid cohesion	"The cell cycle process in which the sister chromatids of a replicated chromosome are joined along the entire length of the chromosome." [GOC:mah, ISBN:0815316194]	ELG1(YOR144C);RFC5(YBR087W);CDC28(YBR160W);RFC4(YOL094C)
GO:0050896	16 of 36 (44.4%)	7.49	2.14	830 of 3988 (20.8%)	0.00115	0.213	response to stimulus	"Any process that results in a change in state or activity of a cell or an organism (in terms of movement, secretion, enzyme production, gene expression, etc.) as a result of a stimulus. The process begins with detection of the stimulus and ends with a change in state or activity or the cell or organism." [GOC:ai, GOC:bf]	PAU24(YBR301W);GPD1(YDL022W);SKN7(YHR206W);POL32(YJR043C);RAD27(YKL113C);STE6(YKL209C);RAD5(YLR032W);PSO2(YMR137C);YNL190W(YNL190W);ELG1(YOR144C);REV1(YOR346W);RFC5(YBR087W);CDC28(YBR160W);YPP1(YGR198W);POL31(YJR006W);RFC4(YOL094C)
GO:0051716	13 of 36 (36.1%)	5.89	2.21	652 of 3988 (16.3%)	0.00314	0.556	cellular response to stimulus	"Any process that results in a change in state or activity of a cell (in terms of movement, secretion, enzyme production, gene expression, etc.) as a result of a stimulus. The process begins with detection of the stimulus by a cell and ends with a change in state or activity or the cell." [GOC:bf, GOC:jl]	GPD1(YDL022W);SKN7(YHR206W);POL32(YJR043C);RAD27(YKL113C);RAD5(YLR032W);PSO2(YMR137C);YNL190W(YNL190W);ELG1(YOR144C);REV1(YOR346W);RFC5(YBR087W);CDC28(YBR160W);POL31(YJR006W);RFC4(YOL094C)
GO:0042276	2 of 36 (5.6%)	0.09	22.16	10 of 3988 (0.3%)	0.00341	0.577	error-prone translesion synthesis	"The conversion of DNA-damage induced single-stranded gaps into large molecular weight DNA after replication by using a specialized DNA polymerase or replication complex to insert a defined nucleotide across the lesion. This process does not remove the replication-blocking lesions and causes an increase in the endogenous mutation level. For example, in E. coli, a low fidelity DNA polymerase, pol …	RAD5(YLR032W);REV1(YOR346W)
GO:0000724	3 of 36 (8.3%)	0.33	8.98	37 of 3988 (0.9%)	0.00425	0.607	double-strand break repair via homologous recombination	"The error-free repair of a double-strand break in DNA in which the broken DNA molecule is repaired using homologous sequences. A strand in the broken DNA searches for a homologous region in an intact chromosome to serve as the template for DNA synthesis. The restoration of two intact DNA molecules results in the exchange, reciprocal or nonreciprocal, of genetic material between the intact DNA mo…	POL32(YJR043C);ELG1(YOR144C);CDC28(YBR160W)
GO:0065008	8 of 36 (22.2%)	2.74	2.92	303 of 3988 (7.6%)	0.00467	0.607	regulation of biological quality	"Any process that modulates a qualitative or quantitative trait of a biological quality. A biological quality is a measurable attribute of an organism or part of an organism, such as size, mass, shape, color, etc." [GOC:dph, GOC:isa_complete, GOC:mah, GOC:pr, GOC:vw]	GPD1(YDL022W);SKN7(YHR206W);MNR2(YKL064W);STE6(YKL209C);RAD5(YLR032W);RIF2(YLR453C);ELG1(YOR144C);FSF1(YOR271C)
GO:0019985	2 of 36 (5.6%)	0.11	18.46	12 of 3988 (0.3%)	0.00494	0.607	translesion synthesis	"The replication of damaged DNA by synthesis across a lesion in the template strand; a specialized DNA polymerase or replication complex inserts a defined nucleotide across from the lesion which allows DNA synthesis to continue beyond the lesion. This process can be mutagenic depending on the damaged nucleotide and the inserted nucleotide." [GOC:elh, PMID:10535901]	RAD5(YLR032W);REV1(YOR346W)
GO:0042592	6 of 36 (16.7%)	1.72	3.50	190 of 3988 (4.8%)	0.00636	0.607	homeostatic process	"Any biological process involved in the maintenance of an internal steady state." [GOC:jl, ISBN:0395825172]	GPD1(YDL022W);MNR2(YKL064W);RAD5(YLR032W);RIF2(YLR453C);ELG1(YOR144C);FSF1(YOR271C)
GO:0006303	2 of 36 (5.6%)	0.13	15.83	14 of 3988 (0.4%)	0.00674	0.607	double-strand break repair via nonhomologous end joining	"The repair of a double-strand break in DNA in which the two broken ends are rejoined with little or no sequence complementarity. Information at the DNA ends may be lost due to the modification of broken DNA ends." [PMID:10827453]	RAD27(YKL113C);CDC28(YBR160W)
GO:0000018	2 of 36 (5.6%)	0.13	15.83	14 of 3988 (0.4%)	0.00674	0.607	regulation of DNA recombination	"Any process that modulates the frequency, rate or extent of DNA recombination, a DNA metabolic process in which a new genotype is formed by reassortment of genes resulting in gene combinations different from those that were present in the parents." [GOC:go_curators, ISBN:0198506732]	ELG1(YOR144C);CDC28(YBR160W)
GO:0000725	3 of 36 (8.3%)	0.42	7.07	47 of 3988 (1.2%)	0.00834	0.607	recombinational repair	"A DNA repair process that involves the exchange, reciprocal or nonreciprocal, of genetic material between the broken DNA molecule and a homologous region of DNA." [GOC:elh]	POL32(YJR043C);ELG1(YOR144C);CDC28(YBR160W)
GO:0006973	1 of 36 (2.8%)	0.01	110.78	1 of 3988 (0.0%)	0.00903	0.607	intracellular accumulation of glycerol	"The accumulation of glycerol within a cell, for example by increased glycerol biosynthesis combined with decreased permeability of the cell membrane to glycerol, in response to the detection of a hyperosmotic environment." [GOC:jl, PMID:11752666]	GPD1(YDL022W)
GO:0010961	1 of 36 (2.8%)	0.01	110.78	1 of 3988 (0.0%)	0.00903	0.607	cellular magnesium ion homeostasis	"Any process involved in the maintenance of an internal steady state of magnesium ions at the level of a cell." [GOC:dph, GOC:tb]	MNR2(YKL064W)
GO:0010960	1 of 36 (2.8%)	0.01	110.78	1 of 3988 (0.0%)	0.00903	0.607	magnesium ion homeostasis	"Any process involved in the maintenance of an internal steady state of magnesium ions within an organism or cell." [GOC:dph, GOC:tb]	MNR2(YKL064W)
GO:0006286	1 of 36 (2.8%)	0.01	110.78	1 of 3988 (0.0%)	0.00903	0.607	base-excision repair, base-free sugar-phosphate removal	"Excision of the sugar phosphate residue at an AP site, i.e. a deoxyribose sugar with a missing base, by a phosphodiesterase enzyme." [ISBN:0815316194]	RAD27(YKL113C)
GO:0000770	1 of 36 (2.8%)	0.01	110.78	1 of 3988 (0.0%)	0.00903	0.607	peptide pheromone export	"The directed movement of a peptide pheromone out of a cell by a secretion or export pathway used solely for the export of peptide pheromones." [GOC:elh]	STE6(YKL209C)
GO:0030072	1 of 36 (2.8%)	0.01	110.78	1 of 3988 (0.0%)	0.00903	0.607	peptide hormone secretion	"The regulated release of a peptide hormone from a cell or organ." [GOC:mah]	STE6(YKL209C)
GO:0002790	1 of 36 (2.8%)	0.01	110.78	1 of 3988 (0.0%)	0.00903	0.607	peptide secretion	"The controlled release of a peptide from a cell or group of cells." [GOC:add]	STE6(YKL209C)
GO:0046879	1 of 36 (2.8%)	0.01	110.78	1 of 3988 (0.0%)	0.00903	0.607	hormone secretion	"The regulated release of hormones, substances with a specific regulatory effect on a particular organ or group of cells." [ISBN:0198506732]	STE6(YKL209C)
GO:0009914	1 of 36 (2.8%)	0.01	110.78	1 of 3988 (0.0%)	0.00903	0.607	hormone transport	"The directed movement of hormones into, out of or within a cell, or between cells, by means of some agent such as a transporter or pore." [GOC:tb]	STE6(YKL209C)
GO:0023061	1 of 36 (2.8%)	0.01	110.78	1 of 3988 (0.0%)	0.00903	0.607	signal release	"The process in which a signal is secreted or discharged into the extracellular medium from a cellular source." [GOC:mtg_signal]	STE6(YKL209C)
GO:0010817	1 of 36 (2.8%)	0.01	110.78	1 of 3988 (0.0%)	0.00903	0.607	regulation of hormone levels	"Any process that modulates the levels of hormone within an organism or a tissue. A hormone is any substance formed in very small amounts in one specialized organ or group of cells and carried (sometimes in the bloodstream) to another organ or group of cells in the same organism, upon which it has a specific regulatory action." [GOC:BHF, GOC:dph, GOC:tb]	STE6(YKL209C)
GO:0003001	1 of 36 (2.8%)	0.01	110.78	1 of 3988 (0.0%)	0.00903	0.607	generation of a signal involved in cell-cell signaling	"The cellular process that creates a physical entity or change in state, i.e. a signal, that originates in one cell and is used to transfer information to another cell. This process begins with the initial formation of the signal and ends with the mature form and placement of the signal." [GOC:dph]	STE6(YKL209C)
GO:0007267	1 of 36 (2.8%)	0.01	110.78	1 of 3988 (0.0%)	0.00903	0.607	cell-cell signaling	"Any process that mediates the transfer of information from one cell to another." [GOC:mah]	STE6(YKL209C)
GO:0051446	1 of 36 (2.8%)	0.01	110.78	1 of 3988 (0.0%)	0.00903	0.607	positive regulation of meiotic cell cycle	"Any process that activates or increases the frequency, rate or extent of progression through the meiotic cell cycle." [GOC:ai, GOC:dph, GOC:tb]	CDC28(YBR160W)
GO:0051447	1 of 36 (2.8%)	0.01	110.78	1 of 3988 (0.0%)	0.00903	0.607	negative regulation of meiotic cell cycle	"Any process that stops, prevents or reduces the rate or extent of progression through the meiotic cell cycle." [GOC:ai, GOC:dph, GOC:tb]	CDC28(YBR160W)
GO:0010571	1 of 36 (2.8%)	0.01	110.78	1 of 3988 (0.0%)	0.00903	0.607	positive regulation of DNA replication involved in S phase	"Any process that activates or increases the frequency, rate or extent of DNA replication that contributes to the progression through S phase of the cell cycle." [GOC:dph, GOC:jp, GOC:tb]	CDC28(YBR160W)
GO:0010569	1 of 36 (2.8%)	0.01	110.78	1 of 3988 (0.0%)	0.00903	0.607	regulation of double-strand break repair via homologous recombination	"Any process that modulates the frequency, rate or extent of the error-free repair of a double-strand break in DNA in which the broken DNA molecule is repaired using homologous sequences." [GOC:dph, GOC:jp, GOC:tb]	CDC28(YBR160W)
GO:2000779	1 of 36 (2.8%)	0.01	110.78	1 of 3988 (0.0%)	0.00903	0.607	regulation of double-strand break repair	"Any process that modulates the frequency, rate or extent of double-strand break repair." [GOC:BHF]	CDC28(YBR160W)
GO:0010568	1 of 36 (2.8%)	0.01	110.78	1 of 3988 (0.0%)	0.00903	0.607	regulation of budding cell apical bud growth	"Any process that modulates the frequency, rate or extent of growth at the tip of a bud, in a cell that reproduces by budding." [GOC:dph, GOC:jp, GOC:tb, PMID:17417630]	CDC28(YBR160W)
GO:2001033	1 of 36 (2.8%)	0.01	110.78	1 of 3988 (0.0%)	0.00903	0.607	negative regulation of double-strand break repair via nonhomologous end joining	"Any process that stops, prevents or reduces the frequency, rate or extent of double-strand break repair via nonhomologous end joining." [GOC:obol]	CDC28(YBR160W)
GO:2000780	1 of 36 (2.8%)	0.01	110.78	1 of 3988 (0.0%)	0.00903	0.607	negative regulation of double-strand break repair	"Any process that stops, prevents or reduces the frequency, rate or extent of double-strand break repair." [GOC:BHF]	CDC28(YBR160W)
GO:2001032	1 of 36 (2.8%)	0.01	110.78	1 of 3988 (0.0%)	0.00903	0.607	regulation of double-strand break repair via nonhomologous end joining	"Any process that modulates the frequency, rate or extent of double-strand break repair via nonhomologous end joining." [GOC:obol]	CDC28(YBR160W)
GO:0045738	1 of 36 (2.8%)	0.01	110.78	1 of 3988 (0.0%)	0.00903	0.607	negative regulation of DNA repair	"Any process that stops, prevents, or reduces the frequency, rate or extent of DNA repair." [GOC:go_curators]	CDC28(YBR160W)
GO:0045875	1 of 36 (2.8%)	0.01	110.78	1 of 3988 (0.0%)	0.00903	0.607	negative regulation of sister chromatid cohesion	"Any process that stops, prevents, or reduces the frequency, rate or extent of sister chromatid cohesion." [GOC:go_curators]	CDC28(YBR160W)
GO:0010898	1 of 36 (2.8%)	0.01	110.78	1 of 3988 (0.0%)	0.00903	0.607	positive regulation of triglyceride catabolic process	"Any process that increases the frequency, rate, or extent of the chemical reactions and pathways resulting in the breakdown of triglyceride." [GOC:rn, GOC:tb]	CDC28(YBR160W)
GO:0010896	1 of 36 (2.8%)	0.01	110.78	1 of 3988 (0.0%)	0.00903	0.607	regulation of triglyceride catabolic process	"Any process that modulates the frequency, rate, or extent of the chemical reactions and pathways resulting in the breakdown of triglyceride." [GOC:rn, GOC:tb]	CDC28(YBR160W)
GO:0090208	1 of 36 (2.8%)	0.01	110.78	1 of 3988 (0.0%)	0.00903	0.607	positive regulation of triglyceride metabolic process	"Any process that increases the frequency, rate or extent of the chemical reactions and pathways involving triglyceride, any triester of glycerol." [GOC:dph, GOC:sl, GOC:tb]	CDC28(YBR160W)
GO:0090207	1 of 36 (2.8%)	0.01	110.78	1 of 3988 (0.0%)	0.00903	0.607	regulation of triglyceride metabolic process	"Any process that modulates the frequency, rate or extent of the chemical reactions and pathways involving triglyceride, any triester of glycerol." [GOC:dph, GOC:sl, GOC:tb]	CDC28(YBR160W)
GO:0006308	2 of 36 (5.6%)	0.18	11.08	20 of 3988 (0.5%)	0.0136	0.898	DNA catabolic process	"The cellular DNA metabolic process resulting in the breakdown of DNA, deoxyribonucleic acid, one of the two main types of nucleic acid, consisting of a long unbranched macromolecule formed from one or two strands of linked deoxyribonucleotides, the 3'-phosphate group of each constituent deoxyribonucleotide being joined in 3',5'-phosphodiester linkage to the 5'-hydroxyl group of the deoxyribose m…	RAD27(YKL113C);CDC28(YBR160W)
GO:0000726	2 of 36 (5.6%)	0.21	9.63	23 of 3988 (0.6%)	0.0178	0.973	non-recombinational repair	"A DNA repair process in which that does not require the exchange of genetic material between the broken DNA molecule and a homologous region of DNA." [GOC:elh]	RAD27(YKL113C);CDC28(YBR160W)
GO:0046168	1 of 36 (2.8%)	0.02	55.39	2 of 3988 (0.1%)	0.018	0.973	glycerol-3-phosphate catabolic process	"The chemical reactions and pathways resulting in the breakdown of glycerol-3-phosphate, a phosphoric monoester of glycerol." [GOC:ai]	GPD1(YDL022W)
GO:0034553	1 of 36 (2.8%)	0.02	55.39	2 of 3988 (0.1%)	0.018	0.973	mitochondrial respiratory chain complex II assembly	"The aggregation, arrangement and bonding together of a set of components to form respiratory chain complex II, in the mitochondrial inner membrane." [GOC:dgf]	YDR379C-A(YDR379C-A)
GO:0034552	1 of 36 (2.8%)	0.02	55.39	2 of 3988 (0.1%)	0.018	0.973	respiratory chain complex II assembly	"The aggregation, arrangement and bonding together of a set of components to form respiratory chain complex II." [GOC:dgf]	YDR379C-A(YDR379C-A)
GO:0097032	1 of 36 (2.8%)	0.02	55.39	2 of 3988 (0.1%)	0.018	0.973	mitochondrial respiratory chain complex II biogenesis	"The biogenesis of a mitochondrial respiratory chain complex II, a protein complex located in the mitochondrial inner membrane that forms part of the mitochondrial respiratory chain. Includes the synthesis of constituent proteins and their aggregation, arrangement and bonding together." [GOC:pr]	YDR379C-A(YDR379C-A)
GO:0000734	1 of 36 (2.8%)	0.02	55.39	2 of 3988 (0.1%)	0.018	0.973	gene conversion at mating-type locus, DNA repair synthesis	"Synthesis of DNA that proceeds from the broken 3' single-strand DNA end uses the homologous intact duplex as the template during gene conversion at the mating-type locus." [GOC:elh]	RAD27(YKL113C)
GO:0042631	1 of 36 (2.8%)	0.02	55.39	2 of 3988 (0.1%)	0.018	0.973	cellular response to water deprivation	"Any process that results in a change in state or activity of a cell (in terms of movement, secretion, enzyme production, gene expression, etc.) as a result of deprivation of water." [GOC:go_curators]	YNL190W(YNL190W)
GO:0009414	1 of 36 (2.8%)	0.02	55.39	2 of 3988 (0.1%)	0.018	0.973	response to water deprivation	"Any process that results in a change in state or activity of a cell or an organism (in terms of movement, secretion, enzyme production, gene expression, etc.) as a result of a water deprivation stimulus, prolonged deprivation of water." [GOC:lr]	YNL190W(YNL190W)
GO:2000105	1 of 36 (2.8%)	0.02	55.39	2 of 3988 (0.1%)	0.018	0.973	positive regulation of DNA-dependent DNA replication	"Any process that activates or increases the frequency, rate or extent of DNA-dependent DNA replication." [GOC:mah]	CDC28(YBR160W)
GO:0007116	1 of 36 (2.8%)	0.02	55.39	2 of 3988 (0.1%)	0.018	0.973	regulation of cell budding	"Any process that modulates the frequency, rate or extent of the formation and growth of cell buds." [GOC:mah]	CDC28(YBR160W)
GO:2001021	1 of 36 (2.8%)	0.02	55.39	2 of 3988 (0.1%)	0.018	0.973	negative regulation of response to DNA damage stimulus	"Any process that stops, prevents or reduces the frequency, rate or extent of response to DNA damage stimulus." [GOC:obol]	CDC28(YBR160W)
GO:0007063	1 of 36 (2.8%)	0.02	55.39	2 of 3988 (0.1%)	0.018	0.973	regulation of sister chromatid cohesion	"Any process that modulates the frequency, rate or extent of sister chromatid cohesion." [GOC:go_curators]	CDC28(YBR160W)
GO:0051983	1 of 36 (2.8%)	0.02	55.39	2 of 3988 (0.1%)	0.018	0.973	regulation of chromosome segregation	"Any process that modulates the frequency, rate or extent of chromosome segregation, the process in which genetic material, in the form of chromosomes, is organized and then physically separated and apportioned to two or more sets." [GOC:ai]	CDC28(YBR160W)
GO:0006310	4 of 36 (11.1%)	1.04	3.85	115 of 3988 (2.9%)	0.019	1	DNA recombination	"Any process in which a new genotype is formed by reassortment of genes resulting in gene combinations different from those that were present in the parents. In eukaryotes genetic recombination can occur by chromosome assortment, intrachromosomal recombination, or nonreciprocal interchromosomal recombination. Intrachromosomal recombination occurs by crossing over. In bacteria it may occur by gene…	POL32(YJR043C);RAD27(YKL113C);ELG1(YOR144C);CDC28(YBR160W)
GO:0051053	2 of 36 (5.6%)	0.23	8.86	25 of 3988 (0.6%)	0.0209	1	negative regulation of DNA metabolic process	"Any process that stops, prevents, or reduces the frequency, rate or extent of the chemical reactions and pathways involving DNA." [GOC:ai]	ELG1(YOR144C);CDC28(YBR160W)
GO:0007059	4 of 36 (11.1%)	1.08	3.69	120 of 3988 (3.0%)	0.0218	1	chromosome segregation	"The process in which genetic material, in the form of chromosomes, is organized into specific structures and then physically separated and apportioned to two or more sets. In eukaryotes, chromosome segregation begins with the alignment of chromosomes at the metaphase plate, includes chromosome separation, and ends when chromosomes have completed movement to the spindle poles." [GOC:ai, GOC:mah]	ELG1(YOR144C);RFC5(YBR087W);CDC28(YBR160W);RFC4(YOL094C)
GO:0044242	2 of 36 (5.6%)	0.24	8.21	27 of 3988 (0.7%)	0.0241	1	cellular lipid catabolic process	"The chemical reactions and pathways resulting in the breakdown of lipids, as carried out by individual cells." [GOC:jl]	PLB2(YMR006C);CDC28(YBR160W)
GO:0006072	1 of 36 (2.8%)	0.03	36.93	3 of 3988 (0.1%)	0.0268	1	glycerol-3-phosphate metabolic process	"The chemical reactions and pathways involving glycerol-3-phosphate, a phosphoric monoester of glycerol." [GOC:go_curators, ISBN:0198506732]	GPD1(YDL022W)
GO:0000304	1 of 36 (2.8%)	0.03	36.93	3 of 3988 (0.1%)	0.0268	1	response to singlet oxygen	"Any process that results in a change in state or activity of a cell or an organism (in terms of movement, secretion, enzyme production, gene expression, etc.) as a result of a singlet oxygen stimulus. Singlet oxygen is a dioxygen (O2) molecule in which two 2p electrons have similar spin. Singlet oxygen is more highly reactive than the form in which these electrons are of opposite spin, and it is…	SKN7(YHR206W)
GO:0010994	1 of 36 (2.8%)	0.03	36.93	3 of 3988 (0.1%)	0.0268	1	free ubiquitin chain polymerization	"The process of creating free ubiquitin chains, compounds composed of a large number of ubiquitin monomers. These chains are not conjugated to a protein." [GOC:BHF, GOC:dph, GOC:tb]	RAD5(YLR032W)
GO:0051436	1 of 36 (2.8%)	0.03	36.93	3 of 3988 (0.1%)	0.0268	1	negative regulation of ubiquitin-protein ligase activity involved in mitotic cell cycle	"Any process that stops, prevents, or reduces the frequency, rate or extent of ubiquitin ligase activity that contributes to the mitotic cell cycle." [GOC:ai, GOC:tb]	ACM1(YPL267W)
GO:0045931	1 of 36 (2.8%)	0.03	36.93	3 of 3988 (0.1%)	0.0268	1	positive regulation of mitotic cell cycle	"Any process that activates or increases the rate or extent of progression through the mitotic cell cycle." [GOC:dph, GOC:go_curators, GOC:tb]	CDC28(YBR160W)
GO:0033262	1 of 36 (2.8%)	0.03	36.93	3 of 3988 (0.1%)	0.0268	1	regulation of DNA replication involved in S phase	"Any process that modulates the frequency, rate or extent of DNA replication that contributes to the progression through S phase of the cell cycle." [GOC:mah]	CDC28(YBR160W)
GO:0033260	1 of 36 (2.8%)	0.03	36.93	3 of 3988 (0.1%)	0.0268	1	DNA replication involved in S phase	"The process in which new strands of genomic DNA are synthesized, using parental DNA as a template for DNA-dependent DNA polymerases, contributing to progression through S phase of the cell cycle." [GOC:mah]	CDC28(YBR160W)
GO:0044265	6 of 36 (16.7%)	2.41	2.49	267 of 3988 (6.7%)	0.0303	1	cellular macromolecule catabolic process	"The chemical reactions and pathways resulting in the breakdown of a macromolecule, any large molecule including proteins, nucleic acids and carbohydrates, as carried out by individual cells." [CHEBI:33694, GOC:jl]	DAS1(YJL149W);POL32(YJR043C);RAD27(YKL113C);CDC28(YBR160W);PUP3(YER094C);POL31(YJR006W)
GO:0034655	5 of 36 (13.9%)	1.79	2.80	198 of 3988 (5.0%)	0.0309	1	nucleobase-containing compound catabolic process	"The chemical reactions and pathways resulting in the breakdown of nucleobases, nucleosides, nucleotides and nucleic acids." [GOC:mah]	POL32(YJR043C);RAD27(YKL113C);STE6(YKL209C);CDC28(YBR160W);POL31(YJR006W)
GO:0071214	2 of 36 (5.6%)	0.30	6.71	33 of 3988 (0.8%)	0.0351	1	cellular response to abiotic stimulus	"Any process that results in a change in state or activity of a cell (in terms of movement, secretion, enzyme production, gene expression, etc.) as a result of an abiotic (non-living) stimulus." [GOC:mah]	GPD1(YDL022W);YNL190W(YNL190W)
GO:0000731	1 of 36 (2.8%)	0.04	27.69	4 of 3988 (0.1%)	0.0356	1	DNA synthesis involved in DNA repair	"Synthesis of DNA that proceeds from the broken 3' single-strand DNA end uses the homologous intact duplex as the template." [PMID:10357855]	RAD27(YKL113C)
GO:0010993	1 of 36 (2.8%)	0.04	27.69	4 of 3988 (0.1%)	0.0356	1	regulation of ubiquitin homeostasis	"Any process that modulates the rate, frequency, or extent of ubiquitin homeostasis. Ubiquitin homeostasis is any process involved in the maintenance of an internal steady state of ubiquitin monomers and free ubiquitin chains at the level of the cell." [GOC:BHF, GOC:dph, GOC:tb]	RAD5(YLR032W)
GO:0010992	1 of 36 (2.8%)	0.04	27.69	4 of 3988 (0.1%)	0.0356	1	ubiquitin homeostasis	"Any process involved in the maintenance of an internal steady state of ubiquitin monomers and free ubiquitin chains at the level of the cell." [GOC:BHF, GOC:dph, GOC:tb]	RAD5(YLR032W)
GO:0071462	1 of 36 (2.8%)	0.04	27.69	4 of 3988 (0.1%)	0.0356	1	cellular response to water stimulus	"Any process that results in a change in state or activity of a cell (in terms of movement, secretion, enzyme production, gene expression, etc.) as a result of a stimulus reflecting the presence, absence, or concentration of water." [GOC:mah]	YNL190W(YNL190W)
GO:0009415	1 of 36 (2.8%)	0.04	27.69	4 of 3988 (0.1%)	0.0356	1	response to water stimulus	"Any process that results in a change in state or activity of a cell or an organism (in terms of movement, secretion, enzyme production, gene expression, etc.) as a result of a stimulus reflecting the presence, absence, or concentration of water." [GOC:jl]	YNL190W(YNL190W)
GO:0051444	1 of 36 (2.8%)	0.04	27.69	4 of 3988 (0.1%)	0.0356	1	negative regulation of ubiquitin-protein ligase activity	"Any process that stops, prevents, or reduces the frequency, rate or extent of ubiquitin ligase activity, the catalysis of the reaction: ATP + ubiquitin + protein lysine = AMP + diphosphate + protein N-ubiquityllysine." [EC:6.3.2.19, GOC:ai, GOC:tb]	ACM1(YPL267W)
GO:0031397	1 of 36 (2.8%)	0.04	27.69	4 of 3988 (0.1%)	0.0356	1	negative regulation of protein ubiquitination	"Any process that stops, prevents, or reduces the frequency, rate or extent of the addition of ubiquitin groups to a protein." [GOC:mah]	ACM1(YPL267W)
GO:0051352	1 of 36 (2.8%)	0.04	27.69	4 of 3988 (0.1%)	0.0356	1	negative regulation of ligase activity	"Any process that stops or reduces the rate of ligase activity, the catalysis of the ligation of two substances with concomitant breaking of a diphosphate linkage, usually in a nucleoside triphosphate." [GOC:ai]	ACM1(YPL267W)
GO:0019433	1 of 36 (2.8%)	0.04	27.69	4 of 3988 (0.1%)	0.0356	1	triglyceride catabolic process	"The chemical reactions and pathways resulting in the breakdown of a triglyceride, any triester of glycerol." [ISBN:0198506732]	CDC28(YBR160W)
GO:0046464	1 of 36 (2.8%)	0.04	27.69	4 of 3988 (0.1%)	0.0356	1	acylglycerol catabolic process	"The chemical reactions and pathways resulting in the breakdown of acylglycerol, any mono-, di- or triester of glycerol with (one or more) fatty acids." [GOC:ai]	CDC28(YBR160W)
GO:0046461	1 of 36 (2.8%)	0.04	27.69	4 of 3988 (0.1%)	0.0356	1	neutral lipid catabolic process	"The chemical reactions and pathways resulting in the breakdown of neutral lipids, lipids only soluble in solvents of very low polarity." [GOC:ai]	CDC28(YBR160W)
GO:0006401	3 of 36 (8.3%)	0.74	4.05	82 of 3988 (2.1%)	0.0368	1	RNA catabolic process	"The chemical reactions and pathways resulting in the breakdown of RNA, ribonucleic acid, one of the two main type of nucleic acid, consisting of a long, unbranched macromolecule formed from ribonucleotides joined in 3',5'-phosphodiester linkage." [ISBN:0198506732]	POL32(YJR043C);RAD27(YKL113C);POL31(YJR006W)
GO:0019439	5 of 36 (13.9%)	1.90	2.64	210 of 3988 (5.3%)	0.0384	1	aromatic compound catabolic process	"The chemical reactions and pathways resulting in the breakdown of aromatic compounds, any substance containing an aromatic carbon ring." [GOC:ai]	POL32(YJR043C);RAD27(YKL113C);STE6(YKL209C);CDC28(YBR160W);POL31(YJR006W)
GO:0016042	2 of 36 (5.6%)	0.32	6.33	35 of 3988 (0.9%)	0.0391	1	lipid catabolic process	"The chemical reactions and pathways resulting in the breakdown of lipids, compounds soluble in an organic solvent but not, or sparingly, in an aqueous solvent." [GOC:go_curators]	PLB2(YMR006C);CDC28(YBR160W)
GO:0009057	6 of 36 (16.7%)	2.56	2.34	284 of 3988 (7.1%)	0.0393	1	macromolecule catabolic process	"The chemical reactions and pathways resulting in the breakdown of a macromolecule, any molecule of high relative molecular mass, the structure of which essentially comprises the multiple repetition of units derived, actually or conceptually, from molecules of low relative molecular mass." [CHEBI:33694, GOC:mah]	DAS1(YJL149W);POL32(YJR043C);RAD27(YKL113C);CDC28(YBR160W);PUP3(YER094C);POL31(YJR006W)
GO:0034645	14 of 36 (38.9%)	8.87	1.58	983 of 3988 (24.6%)	0.0407	1	cellular macromolecule biosynthetic process	"The chemical reactions and pathways resulting in the formation of a macromolecule, any molecule of high relative molecular mass, the structure of which essentially comprises the multiple repetition of units derived, actually or conceptually, from molecules of low relative molecular mass, carried out by individual cells." [CHEBI:33694, GOC:mah]	TBS1(YBR150C);SKN7(YHR206W);POL32(YJR043C);RAD27(YKL113C);RAD5(YLR032W);RIF2(YLR453C);ELG1(YOR144C);REV1(YOR346W);ACM1(YPL267W);RFC5(YBR087W);CDC28(YBR160W);POL31(YJR006W);RPC37(YKR025W);RFC4(YOL094C)
GO:0009059	14 of 36 (38.9%)	8.92	1.57	988 of 3988 (24.8%)	0.0423	1	macromolecule biosynthetic process	"The chemical reactions and pathways resulting in the formation of a macromolecule, any molecule of high relative molecular mass, the structure of which essentially comprises the multiple repetition of units derived, actually or conceptually, from molecules of low relative molecular mass." [CHEBI:33694, GOC:mah]	TBS1(YBR150C);SKN7(YHR206W);POL32(YJR043C);RAD27(YKL113C);RAD5(YLR032W);RIF2(YLR453C);ELG1(YOR144C);REV1(YOR346W);ACM1(YPL267W);RFC5(YBR087W);CDC28(YBR160W);POL31(YJR006W);RPC37(YKR025W);RFC4(YOL094C)
GO:0044270	5 of 36 (13.9%)	1.95	2.56	216 of 3988 (5.4%)	0.0426	1	cellular nitrogen compound catabolic process	"The chemical reactions and pathways resulting in the breakdown of organic and inorganic nitrogenous compounds." [GOC:jl, ISBN:0198506732]	POL32(YJR043C);RAD27(YKL113C);STE6(YKL209C);CDC28(YBR160W);POL31(YJR006W)
GO:0016567	3 of 36 (8.3%)	0.79	3.82	87 of 3988 (2.2%)	0.0427	1	protein ubiquitination	"The process in which one or more ubiquitin groups are added to a protein." [GOC:ai]	DAS1(YJL149W);RAD5(YLR032W);ACM1(YPL267W)
GO:0046700	5 of 36 (13.9%)	1.96	2.55	217 of 3988 (5.4%)	0.0433	1	heterocycle catabolic process	"The chemical reactions and pathways resulting in the breakdown of heterocyclic compounds, those with a cyclic molecular structure and at least two different atoms in the ring (or rings)." [GOC:ai]	POL32(YJR043C);RAD27(YKL113C);STE6(YKL209C);CDC28(YBR160W);POL31(YJR006W)
GO:0000160	1 of 36 (2.8%)	0.05	22.16	5 of 3988 (0.1%)	0.0443	1	phosphorelay signal transduction system	"A conserved series of molecular signals found in prokaryotes and eukaryotes; involves autophosphorylation of a histidine kinase and the transfer of the phosphate group to an aspartate that then acts as a phospho-donor to response regulator proteins." [PMID:9191038]	SKN7(YHR206W)
GO:0043619	1 of 36 (2.8%)	0.05	22.16	5 of 3988 (0.1%)	0.0443	1	regulation of transcription from RNA polymerase II promoter in response to oxidative stress	"Modulation of the frequency, rate or extent of transcription from an RNA polymerase II promoter as a result of a stimulus indicating the organism is under oxidative stress, a state often resulting from exposure to high levels of reactive oxygen species, e.g. superoxide anions, hydrogen peroxide (H2O2), and hydroxyl radicals." [GOC:jl]	SKN7(YHR206W)
GO:0051439	1 of 36 (2.8%)	0.05	22.16	5 of 3988 (0.1%)	0.0443	1	regulation of ubiquitin-protein ligase activity involved in mitotic cell cycle	"A cell cycle process that modulates the frequency, rate or extent of ubiquitin ligase activity that contributes to the mitotic cell cycle." [GOC:ai]	ACM1(YPL267W)
GO:0045740	1 of 36 (2.8%)	0.05	22.16	5 of 3988 (0.1%)	0.0443	1	positive regulation of DNA replication	"Any process that activates or increases the frequency, rate or extent of DNA replication." [GOC:go_curators]	CDC28(YBR160W)
GO:0050996	1 of 36 (2.8%)	0.05	22.16	5 of 3988 (0.1%)	0.0443	1	positive regulation of lipid catabolic process	"Any process that activates or increases the frequency, rate or extent of the chemical reactions and pathways resulting in the breakdown of lipids." [GOC:ai]	CDC28(YBR160W)
GO:0050994	1 of 36 (2.8%)	0.05	22.16	5 of 3988 (0.1%)	0.0443	1	regulation of lipid catabolic process	"Any process that modulates the frequency, rate, or extent of the chemical reactions and pathways resulting in the breakdown of lipids." [GOC:ai]	CDC28(YBR160W)
GO:0006898	1 of 36 (2.8%)	0.05	22.16	5 of 3988 (0.1%)	0.0443	1	receptor-mediated endocytosis	"An endocytosis process in which cell surface receptors ensure specificity of transport. A specific receptor on the cell surface binds tightly to the extracellular macromolecule (the ligand) that it recognizes; the plasma-membrane region containing the receptor-ligand complex then undergoes endocytosis, forming a transport vesicle containing the receptor-ligand complex and excluding most other pl…	YPP1(YGR198W)
GO:0006289	2 of 36 (5.6%)	0.34	5.83	38 of 3988 (1.0%)	0.0455	1	nucleotide-excision repair	"A DNA repair process in which a small region of the strand surrounding the damage is removed from the DNA helix as an oligonucleotide. The small gap left in the DNA helix is filled in by the sequential action of DNA polymerase and DNA ligase. Nucleotide excision repair recognizes a wide range of substrates, including damage caused by UV irradiation (pyrimidine dimers and 6-4 photoproducts) and c…	POL32(YJR043C);POL31(YJR006W)
GO:1901361	5 of 36 (13.9%)	1.99	2.52	220 of 3988 (5.5%)	0.0455	1	organic cyclic compound catabolic process	"The chemical reactions and pathways resulting in the breakdown of organic cyclic compound." [GOC:TermGenie]	POL32(YJR043C);RAD27(YKL113C);STE6(YKL209C);CDC28(YBR160W);POL31(YJR006W)
GO:0090304	15 of 36 (41.7%)	9.91	1.51	1098 of 3988 (27.5%)	0.0466	1	nucleic acid metabolic process	"Any cellular metabolic process involving nucleic acids." [GOC:dph, GOC:tb]	TBS1(YBR150C);SKN7(YHR206W);POL32(YJR043C);RAD27(YKL113C);RAD5(YLR032W);RIF2(YLR453C);PSO2(YMR137C);ELG1(YOR144C);REV1(YOR346W);ACM1(YPL267W);RFC5(YBR087W);CDC28(YBR160W);POL31(YJR006W);RPC37(YKR025W);RFC4(YOL094C)
GO:1901700	2 of 36 (5.6%)	0.35	5.68	39 of 3988 (1.0%)	0.0476	1	response to oxygen-containing compound	"Any process that results in a change in state or activity of a cell or an organism (in terms of movement, secretion, enzyme production, gene expression, etc.) as a result of an oxygen-containing compound stimulus." [GOC:pr, GOC:TermGenie]	SKN7(YHR206W);YNL190W(YNL190W)
GO:0009056	10 of 36 (27.8%)	5.71	1.75	633 of 3988 (15.9%)	0.0485	1	catabolic process	"The chemical reactions and pathways resulting in the breakdown of substances, including the breakdown of carbon compounds with the liberation of energy for use by the cell or organism." [ISBN:0198547684]	GPD1(YDL022W);DAS1(YJL149W);POL32(YJR043C);RAD27(YKL113C);STE6(YKL209C);PLB2(YMR006C);CDC28(YBR160W);TRS31(YDR472W);PUP3(YER094C);POL31(YJR006W)
Depleted
GO:0010467	5 of 36 (13.9%)	9.82	0.51	1088 of 3988 (27.3%)	0.0458	1	gene expression	"The process in which a gene's sequence is converted into a mature gene product or products (proteins or RNA). This includes the production of an RNA transcript as well as any processing to produce a mature RNA product or an mRNA (for protein-coding genes) and the translation of that mRNA into protein. Some protein processing events may be included when they are required to form an active form of…	TBS1(YBR150C);SKN7(YHR206W);ACM1(YPL267W);CDC28(YBR160W);RPC37(YKR025W)
MOLECULAR_FUNCTION
GO_term	set	expected	enrichment	background	p_fisher(1side)	fdr	Name	Description
GO:0004527	4 of 36 (11.1%)	0.23	17.04	26 of 3988 (0.7%)	7.26e-05	0.126	exonuclease activity	"Catalysis of the hydrolysis of ester linkages within nucleic acids by removing nucleotide residues from the 3' or 5' end." [GOC:mah, ISBN:0198547684]	POL32(YJR043C);RAD27(YKL113C);PSO2(YMR137C);POL31(YJR006W)
GO:0003887	3 of 36 (8.3%)	0.14	22.16	15 of 3988 (0.4%)	0.000285	0.126	DNA-directed DNA polymerase activity	"Catalysis of the reaction: deoxynucleoside triphosphate + DNA(n) = diphosphate + DNA(n+1); the synthesis of DNA from deoxyribonucleotide triphosphates in the presence of a DNA template and primer." [EC:2.7.7.7, ISBN:0198547684]	POL32(YJR043C);REV1(YOR346W);POL31(YJR006W)
GO:0034061	3 of 36 (8.3%)	0.14	22.16	15 of 3988 (0.4%)	0.000285	0.126	DNA polymerase activity	"Catalysis of the reaction: deoxynucleoside triphosphate + DNA(n) = diphosphate + DNA(n+1); the synthesis of DNA from deoxyribonucleotide triphosphates in the presence of a nucleic acid template and primer." [EC:2.7.7.7, GOC:mah]	POL32(YJR043C);REV1(YOR346W);POL31(YJR006W)
GO:0008310	2 of 36 (5.6%)	0.04	55.39	4 of 3988 (0.1%)	0.00047	0.126	single-stranded DNA specific 3'-5' exodeoxyribonuclease activity	"Catalysis of the sequential cleavage of mononucleotides from a free 3' terminus of a single-stranded DNA molecule." [GOC:mah]	POL32(YJR043C);POL31(YJR006W)
GO:0008297	2 of 36 (5.6%)	0.04	55.39	4 of 3988 (0.1%)	0.00047	0.126	single-stranded DNA specific exodeoxyribonuclease activity	"Catalysis of the sequential cleavage of mononucleotides from a free 5' or 3' terminus of a single-stranded DNA molecule." [GOC:mah]	POL32(YJR043C);POL31(YJR006W)
GO:0003689	2 of 36 (5.6%)	0.04	55.39	4 of 3988 (0.1%)	0.00047	0.126	DNA clamp loader activity	"Catalysis of the reaction: ATP + H2O = ADP + phosphate, to drive the opening of the ring structure of the PCNA complex, or any of the related sliding clamp complexes, and their closing around the DNA duplex." [GOC:mah, GOC:vw, PMID:16082778]	RFC5(YBR087W);RFC4(YOL094C)
GO:0033170	2 of 36 (5.6%)	0.04	55.39	4 of 3988 (0.1%)	0.00047	0.126	protein-DNA loading ATPase activity	"Catalysis of the reaction: ATP + H2O = ADP + phosphate, to drive the assembly of a protein or protein complex onto a DNA molecule." [GOC:mah, GOC:vw]	RFC5(YBR087W);RFC4(YOL094C)
GO:0008409	2 of 36 (5.6%)	0.05	44.31	5 of 3988 (0.1%)	0.000779	0.183	5'-3' exonuclease activity	"Catalysis of the hydrolysis of ester linkages within nucleic acids by removing nucleotide residues from the 5' end." [GOC:ai]	RAD27(YKL113C);PSO2(YMR137C)
GO:0016779	4 of 36 (11.1%)	0.45	8.86	50 of 3988 (1.3%)	0.000959	0.2	nucleotidyltransferase activity	"Catalysis of the transfer of a nucleotidyl group to a reactant." [ISBN:0198506732]	POL32(YJR043C);REV1(YOR346W);POL31(YJR006W);RPC37(YKR025W)
GO:0008296	2 of 36 (5.6%)	0.05	36.93	6 of 3988 (0.2%)	0.00116	0.219	3'-5'-exodeoxyribonuclease activity	"Catalysis of the sequential cleavage of mononucleotides from a free 3' terminus of a DNA molecule." [GOC:mah]	POL32(YJR043C);POL31(YJR006W)
GO:0003677	10 of 36 (27.8%)	3.42	2.92	379 of 3988 (9.5%)	0.00141	0.234	DNA binding	"Any molecular function by which a gene product interacts selectively and non-covalently with DNA (deoxyribonucleic acid)." [GOC:dph, GOC:jl, GOC:tb, GOC:vw]	TBS1(YBR150C);SKN7(YHR206W);RAD27(YKL113C);RAD5(YLR032W);RIF2(YLR453C);PSO2(YMR137C);REV1(YOR346W);RFC5(YBR087W);POL31(YJR006W);RFC4(YOL094C)
GO:0004536	3 of 36 (8.3%)	0.23	12.78	26 of 3988 (0.7%)	0.00152	0.234	deoxyribonuclease activity	"Catalysis of the hydrolysis of ester linkages within deoxyribonucleic acid." [GOC:mah, ISBN:0198547684]	POL32(YJR043C);RAD27(YKL113C);POL31(YJR006W)
GO:0016895	2 of 36 (5.6%)	0.06	31.65	7 of 3988 (0.2%)	0.00162	0.234	exodeoxyribonuclease activity, producing 5'-phosphomonoesters	"Catalysis of the hydrolysis of ester linkages within deoxyribonucleic acids by removing nucleotide residues from the 3' or 5' end to yield 5' phosphomonoesters." [GOC:ai]	POL32(YJR043C);POL31(YJR006W)
GO:0004529	2 of 36 (5.6%)	0.07	27.69	8 of 3988 (0.2%)	0.00214	0.288	exodeoxyribonuclease activity	"Catalysis of the sequential cleavage of mononucleotides from a free 5' or 3' terminus of a DNA molecule." [GOC:mah, ISBN:0198547684]	POL32(YJR043C);POL31(YJR006W)
GO:0004518	4 of 36 (11.1%)	0.62	6.42	69 of 3988 (1.7%)	0.00319	0.399	nuclease activity	"Catalysis of the hydrolysis of ester linkages within nucleic acids." [ISBN:0198547684]	POL32(YJR043C);RAD27(YKL113C);PSO2(YMR137C);POL31(YJR006W)
GO:0008094	3 of 36 (8.3%)	0.42	7.22	46 of 3988 (1.2%)	0.00786	0.772	DNA-dependent ATPase activity	"Catalysis of the reaction: ATP + H2O = ADP + phosphate; this reaction requires the presence of single- or double-stranded DNA, and it drives another reaction." [EC:3.6.1.3, GOC:jl]	RAD5(YLR032W);RFC5(YBR087W);RFC4(YOL094C)
GO:0008408	2 of 36 (5.6%)	0.14	13.85	16 of 3988 (0.4%)	0.00878	0.772	3'-5' exonuclease activity	"Catalysis of the hydrolysis of ester linkages within nucleic acids by removing nucleotide residues from the 3' end." [GOC:ai]	POL32(YJR043C);POL31(YJR006W)
GO:0016796	2 of 36 (5.6%)	0.14	13.85	16 of 3988 (0.4%)	0.00878	0.772	exonuclease activity, active with either ribo- or deoxyribonucleic acids and producing 5'-phosphomonoesters	"Catalysis of the hydrolysis of ester linkages within nucleic acids by removing nucleotide residues from the 3' or 5' end to yield 5' phosphomonoesters." [GOC:mah]	POL32(YJR043C);POL31(YJR006W)
GO:0017125	1 of 36 (2.8%)	0.01	110.78	1 of 3988 (0.0%)	0.00903	0.772	deoxycytidyl transferase activity	"Catalysis of the insertion of a dCMP residue opposite a template abasic site in DNA." [PMID:10535901]	REV1(YOR346W)
GO:0055105	1 of 36 (2.8%)	0.01	110.78	1 of 3988 (0.0%)	0.00903	0.772	ubiquitin-protein ligase inhibitor activity	"Stops, prevents or reduces the activity of a ubiquitin-protein ligase." [GOC:BHF, GOC:rl]	ACM1(YPL267W)
GO:0055104	1 of 36 (2.8%)	0.01	110.78	1 of 3988 (0.0%)	0.00903	0.772	ligase inhibitor activity	"Stops, prevents or reduces the activity of a ligase." [GOC:BHF, GOC:rl]	ACM1(YPL267W)
GO:0061133	1 of 36 (2.8%)	0.01	110.78	1 of 3988 (0.0%)	0.00903	0.772	endopeptidase activator activity	"Increases the activity of an endopeptidase, any enzyme that hydrolyzes nonterminal peptide bonds in polypeptides." [GOC:dph, GOC:tb]	PUP3(YER094C)
GO:0003684	2 of 36 (5.6%)	0.20	10.07	22 of 3988 (0.6%)	0.0163	1	damaged DNA binding	"Interacting selectively and non-covalently with damaged DNA." [GOC:jl]	PSO2(YMR137C);REV1(YOR346W)
GO:0004367	1 of 36 (2.8%)	0.02	55.39	2 of 3988 (0.1%)	0.018	1	glycerol-3-phosphate dehydrogenase [NAD+] activity	"Catalysis of the reaction: sn-glycerol 3-phosphate + NAD+ = glycerone phosphate + NADH + H+." [EC:1.1.1.8]	GPD1(YDL022W)
GO:0004622	1 of 36 (2.8%)	0.02	55.39	2 of 3988 (0.1%)	0.018	1	lysophospholipase activity	"Catalysis of the reaction: 2-lysophosphatidylcholine + H2O = glycerophosphocholine + a carboxylate." [EC:3.1.1.5]	PLB2(YMR006C)
GO:0016504	1 of 36 (2.8%)	0.02	55.39	2 of 3988 (0.1%)	0.018	1	peptidase activator activity	"Increases the activity of a peptidase, any enzyme that catalyzes the hydrolysis peptide bonds." [GOC:ai]	PUP3(YER094C)
GO:0015095	1 of 36 (2.8%)	0.03	36.93	3 of 3988 (0.1%)	0.0268	1	magnesium ion transmembrane transporter activity	"Catalysis of the transfer of magnesium (Mg) ions from one side of a membrane to the other." [GOC:dgf]	MNR2(YKL064W)
GO:0015440	1 of 36 (2.8%)	0.03	36.93	3 of 3988 (0.1%)	0.0268	1	peptide-transporting ATPase activity	"Catalysis of the reaction: ATP + H2O + peptide(in) = ADP + phosphate + peptide(out). Peptides exported include alpha-hemolysin, cyclolysin, colicin V and siderophores from Gram-negative bacteria, and bacteriocin, subtilin, competence factor and pediocin from Gram-positive bacteria." [EC:3.6.3.43]	STE6(YKL209C)
GO:0009378	1 of 36 (2.8%)	0.03	36.93	3 of 3988 (0.1%)	0.0268	1	four-way junction helicase activity	"Catalysis of the unwinding of the DNA helix of DNA containing four-way junctions, including Holliday junctions." [GOC:jl, PMID:9442895]	RAD5(YLR032W)
GO:0000403	1 of 36 (2.8%)	0.03	36.93	3 of 3988 (0.1%)	0.0268	1	Y-form DNA binding	"Interacting selectively and non-covalently with segment of DNA shaped like a Y. This shape occurs when DNA contains a region of paired double-stranded DNA on one end and a region of unpaired DNA strands on the opposite end." [GOC:elh, PMID:16781730]	RAD5(YLR032W)
GO:0042623	4 of 36 (11.1%)	1.16	3.43	129 of 3988 (3.2%)	0.0276	1	ATPase activity, coupled	"Catalysis of the reaction: ATP + H2O = ADP + phosphate; this reaction directly drives some other reaction, for example ion transport across a membrane." [EC:3.6.1.3, GOC:jl]	STE6(YKL209C);RAD5(YLR032W);RFC5(YBR087W);RFC4(YOL094C)
GO:0000156	1 of 36 (2.8%)	0.04	27.69	4 of 3988 (0.1%)	0.0356	1	phosphorelay response regulator activity	"Responds to a phosphorelay sensor to initiate a change in cell state or activity. The activity of the response regulator is regulated by transfer of a phosphate from a histidine residue in the sensor, to an aspartate residue in the response regulator. Many but not all response regulators act as transcriptional regulators to elicit a response." [GOC:bf, PMID:10966457, PMID:11842140]	SKN7(YHR206W)
GO:0055106	1 of 36 (2.8%)	0.04	27.69	4 of 3988 (0.1%)	0.0356	1	ubiquitin-protein ligase regulator activity	"Modulates the activity of a ubiquitin-protein ligase, an enzyme that catalyzes the covalent attachment of ubiquitin to lysine in a substrate protein." [GOC:BHF, GOC:rl]	ACM1(YPL267W)
GO:0055103	1 of 36 (2.8%)	0.04	27.69	4 of 3988 (0.1%)	0.0356	1	ligase regulator activity	"Modulates the activity of a ligase." [GOC:BHF, GOC:rl]	ACM1(YPL267W)
GO:0061135	1 of 36 (2.8%)	0.04	27.69	4 of 3988 (0.1%)	0.0356	1	endopeptidase regulator activity	"Modulates the activity of a peptidase, any enzyme that hydrolyzes nonterminal peptide bonds in polypeptides." [GOC:dph, GOC:tb]	PUP3(YER094C)
GO:0016788	5 of 36 (13.9%)	1.87	2.68	207 of 3988 (5.2%)	0.0364	1	hydrolase activity, acting on ester bonds	"Catalysis of the hydrolysis of any ester bond." [GOC:jl]	POL32(YJR043C);RAD27(YKL113C);PLB2(YMR006C);PSO2(YMR137C);POL31(YJR006W)
GO:0003676	11 of 36 (30.6%)	6.26	1.76	694 of 3988 (17.4%)	0.0372	1	nucleic acid binding	"Interacting selectively and non-covalently with any nucleic acid." [GOC:jl]	TBS1(YBR150C);YGR001C(YGR001C);SKN7(YHR206W);RAD27(YKL113C);RAD5(YLR032W);RIF2(YLR453C);PSO2(YMR137C);REV1(YOR346W);RFC5(YBR087W);POL31(YJR006W);RFC4(YOL094C)
GO:0017108	1 of 36 (2.8%)	0.05	22.16	5 of 3988 (0.1%)	0.0443	1	5'-flap endonuclease activity	"Catalysis of the cleavage of a 5' flap structure in DNA, but not other DNA structures; processes the 5' ends of Okazaki fragments in lagging strand DNA synthesis." [PMID:9778254]	RAD27(YKL113C)
GO:0048256	1 of 36 (2.8%)	0.05	22.16	5 of 3988 (0.1%)	0.0443	1	flap endonuclease activity	"Catalysis of the cleavage of a flap structure in DNA, but not other DNA structures; processes the ends of Okazaki fragments in lagging strand DNA synthesis." [GOC:jid]	RAD27(YKL113C)
GO:0032934	1 of 36 (2.8%)	0.05	22.16	5 of 3988 (0.1%)	0.0443	1	sterol binding	"Interacting selectively and non-covalently with a sterol, any steroid containing a hydroxy group in the 3 position, closely related to cholestan-3-ol." [CHEBI:15889, GOC:mah]	PRY2(YKR013W)
GO:0005496	1 of 36 (2.8%)	0.05	22.16	5 of 3988 (0.1%)	0.0443	1	steroid binding	"Interacting selectively and non-covalently with a steroid, any of a large group of substances that have in common a ring system based on 1,2-cyclopentanoperhydrophenanthrene." [GOC:jl, ISBN:0198506732]	PRY2(YKR013W)
GO:0000400	1 of 36 (2.8%)	0.05	22.16	5 of 3988 (0.1%)	0.0443	1	four-way junction DNA binding	"Interacting selectively and non-covalently with DNA containing four-way junctions, also known as Holliday junctions, a structure where two DNA double strands are held together by reciprocal exchange of two of the four strands, one strand each from the two original helices." [GOC:krc, ISBN:0815332181, PMID:15563464]	RAD5(YLR032W)
GO:0004620	1 of 36 (2.8%)	0.05	22.16	5 of 3988 (0.1%)	0.0443	1	phospholipase activity	"Catalysis of the hydrolysis of a glycerophospholipid." [ISBN:0198506732]	PLB2(YMR006C)
GO:0061134	1 of 36 (2.8%)	0.05	22.16	5 of 3988 (0.1%)	0.0443	1	peptidase regulator activity	"Modulates the activity of a peptidase, any enzyme that catalyzes the hydrolysis peptide bonds." [GOC:dph, GOC:tb]	PUP3(YER094C)
CELLULAR_COMPONENT
GO_term	set	expected	enrichment	background	p_fisher(1side)	fdr	Name	Description
GO:0031391	3 of 36 (8.3%)	0.04	83.08	4 of 3988 (0.1%)	2.69e-06	0.00211	Elg1 RFC-like complex	"A pentameric complex related to replication factor C, which loads the DNA polymerase processivity factor proliferating cell nuclear antigen (PCNA) onto DNA and has roles in telomere length regulation and other aspects of genome stability. In Saccharomyces the subunits are known as Elg1p, Rfc2p, Rfc3p, Rfc4p, and Rfc5p." [PMID:14614842]	ELG1(YOR144C);RFC5(YBR087W);RFC4(YOL094C)
GO:0005657	5 of 36 (13.9%)	0.37	13.51	41 of 3988 (1.0%)	2.67e-05	0.0104	replication fork	"The Y-shaped region of a replicating DNA molecule, resulting from the separation of the DNA strands and in which the synthesis of new strands takes place. Also includes associated protein complexes." [GOC:mah, ISBN:0198547684]	POL32(YJR043C);REV1(YOR346W);RFC5(YBR087W);POL31(YJR006W);RFC4(YOL094C)
GO:0043625	2 of 36 (5.6%)	0.03	73.85	3 of 3988 (0.1%)	0.000236	0.0463	delta DNA polymerase complex	"A multimeric DNA polymerase enzyme complex which differs in composition amongst species; in humans it is a heterotetramer of four subunits of approximately 125, 50, 68 and 12kDa, while in S. cerevisiae, it has three different subunits which form a heterotrimer, and the active enzyme is a dimer of this heterotrimer. Functions in DNA replication, mismatch repair and excision repair." [GOC:jl, ISBN…	POL32(YJR043C);POL31(YJR006W)
GO:0005663	2 of 36 (5.6%)	0.03	73.85	3 of 3988 (0.1%)	0.000236	0.0463	DNA replication factor C complex	"A complex of five polypeptides in eukaryotes, and two in prokaryotes, that loads the DNA polymerase processivity factor proliferating cell nuclear antigen (PCNA) onto DNA, thereby permitting processive DNA synthesis catalyzed by DNA polymerase." [PMID:14614842, PMID:14646196, PMID:16172520]	RFC5(YBR087W);RFC4(YOL094C)
GO:0044427	9 of 36 (25.0%)	2.34	3.85	259 of 3988 (6.5%)	0.000356	0.0558	chromosomal part	"Any constituent part of a chromosome, a structure composed of a very long molecule of DNA and associated proteins (e.g. histones) that carries hereditary information." [GOC:jl]	LIN1(YHR156C);POL32(YJR043C);RAD5(YLR032W);RIF2(YLR453C);ELG1(YOR144C);REV1(YOR346W);RFC5(YBR087W);POL31(YJR006W);RFC4(YOL094C)
GO:0031389	2 of 36 (5.6%)	0.04	55.39	4 of 3988 (0.1%)	0.00047	0.0614	Rad17 RFC-like complex	"A pentameric protein complex related to replication factor C, which loads a trimeric complex of checkpoint proteins (known as the checkpoint clamp or 9-1-1 complex) onto DNA at damage sites; functions in DNA damage cell cycle checkpoints. In Schizosaccharomyces pombe the subunits are known as Rad17, Rfc2, Rfc3, Rfc4, and Rfc5, while in Saccharomyces cerevisiae the subunits are known as Rad24p, R…	RFC5(YBR087W);RFC4(YOL094C)
GO:0005694	9 of 36 (25.0%)	2.56	3.51	284 of 3988 (7.1%)	0.000704	0.0788	chromosome	"A structure composed of a very long molecule of DNA and associated proteins (e.g. histones) that carries hereditary information." [ISBN:0198547684]	LIN1(YHR156C);POL32(YJR043C);RAD5(YLR032W);RIF2(YLR453C);ELG1(YOR144C);REV1(YOR346W);RFC5(YBR087W);POL31(YJR006W);RFC4(YOL094C)
GO:0031390	2 of 36 (5.6%)	0.05	36.93	6 of 3988 (0.2%)	0.00116	0.114	Ctf18 RFC-like complex	"A heptameric complex related to replication factor C, which loads the DNA polymerase processivity factor proliferating cell nuclear antigen (PCNA) onto DNA and plays a vital role in chromosome cohesion. In Saccharomyces the subunits are known as Ctf18p, Rfc2p, Rfc3p, Rfc4p, Rfc5p, Dcc1p, and Ctf8p." [PMID:14614842]	RFC5(YBR087W);RFC4(YOL094C)
GO:0042575	2 of 36 (5.6%)	0.07	27.69	8 of 3988 (0.2%)	0.00214	0.187	DNA polymerase complex	"A protein complex that possesses DNA polymerase activity and is involved in template directed synthesis of DNA." [GOC:jl, PMID:12045093]	POL32(YJR043C);POL31(YJR006W)
GO:0043601	2 of 36 (5.6%)	0.13	15.83	14 of 3988 (0.4%)	0.00674	0.454	nuclear replisome	"A multi-component enzymatic machine at the nuclear replication fork, which mediates DNA replication. Includes DNA primase, one or more DNA polymerases, DNA helicases, and other proteins." [GOC:jl, GOC:mtg_sensu]	POL32(YJR043C);POL31(YJR006W)
GO:0030894	2 of 36 (5.6%)	0.13	15.83	14 of 3988 (0.4%)	0.00674	0.454	replisome	"A multi-component enzymatic machine at the replication fork which mediates DNA replication. Includes DNA primase, one or more DNA polymerases, DNA helicases, and other proteins." [GOC:mah, GOC:vw]	POL32(YJR043C);POL31(YJR006W)
GO:0032993	3 of 36 (8.3%)	0.40	7.55	44 of 3988 (1.1%)	0.00694	0.454	protein-DNA complex	"A macromolecular complex containing both protein and DNA molecules." [GOC:mah]	POL32(YJR043C);RIF2(YLR453C);POL31(YJR006W)
GO:0005576	3 of 36 (8.3%)	0.55	5.45	61 of 3988 (1.5%)	0.017	1	extracellular region	"The space external to the outermost structure of a cell. For cells without external protective or external encapsulating structures this refers to space outside of the plasma membrane. This term covers the host cell environment outside an intracellular parasite." [GOC:go_curators]	PAU24(YBR301W);PRY2(YKR013W);PLB2(YMR006C)
GO:0009277	3 of 36 (8.3%)	0.57	5.28	63 of 3988 (1.6%)	0.0185	1	fungal-type cell wall	"A rigid yet dynamic structure surrounding the plasma membrane that affords protection from stresses and contributes to cell morphogenesis, consisting of extensively cross-linked glycoproteins and carbohydrates. The glycoproteins may be modified with N- or O-linked carbohydrates, or glycosylphosphatidylinositol (GPI) anchors; the polysaccharides are primarily branched glucans, including beta-link…	PAU24(YBR301W);PLB2(YMR006C);YNL190W(YNL190W)
GO:0005618	3 of 36 (8.3%)	0.60	5.04	66 of 3988 (1.7%)	0.0209	1	cell wall	"The rigid or semi-rigid envelope lying outside the cell membrane of plant, fungal, and most prokaryotic cells, maintaining their shape and protecting them from osmotic lysis. In plants it is made of cellulose and, often, lignin; in fungi it is composed largely of polysaccharides; in bacteria it is composed of peptidoglycan." [ISBN:0198547684]	PAU24(YBR301W);PLB2(YMR006C);YNL190W(YNL190W)
GO:0030312	3 of 36 (8.3%)	0.60	5.04	66 of 3988 (1.7%)	0.0209	1	external encapsulating structure	"A structure that lies outside the plasma membrane and surrounds the entire cell." [GOC:go_curators]	PAU24(YBR301W);PLB2(YMR006C);YNL190W(YNL190W)
GO:0043232	13 of 36 (36.1%)	7.52	1.73	833 of 3988 (20.9%)	0.0251	1	intracellular non-membrane-bounded organelle	"Organized structure of distinctive morphology and function, not bounded by a lipid bilayer membrane and occurring within the cell. Includes ribosomes, the cytoskeleton and chromosomes." [GOC:go_curators]	LIN1(YHR156C);POL32(YJR043C);RAD27(YKL113C);RAD5(YLR032W);RIF2(YLR453C);YMR295C(YMR295C);ELG1(YOR144C);REV1(YOR346W);RFC5(YBR087W);CDC28(YBR160W);YPP1(YGR198W);POL31(YJR006W);RFC4(YOL094C)
GO:0043228	13 of 36 (36.1%)	7.52	1.73	833 of 3988 (20.9%)	0.0251	1	non-membrane-bounded organelle	"Organized structure of distinctive morphology and function, not bounded by a lipid bilayer membrane. Includes ribosomes, the cytoskeleton and chromosomes." [GOC:go_curators]	LIN1(YHR156C);POL32(YJR043C);RAD27(YKL113C);RAD5(YLR032W);RIF2(YLR453C);YMR295C(YMR295C);ELG1(YOR144C);REV1(YOR346W);RFC5(YBR087W);CDC28(YBR160W);YPP1(YGR198W);POL31(YJR006W);RFC4(YOL094C)
GO:0009331	1 of 36 (2.8%)	0.03	36.93	3 of 3988 (0.1%)	0.0268	1	glycerol-3-phosphate dehydrogenase complex	"An enzyme complex that catalyzes the dehydrogenation of sn-glycerol 3-phosphate to form glycerone phosphate." [EC:1.1.5.3]	GPD1(YDL022W)
GO:0044454	5 of 36 (13.9%)	1.80	2.78	199 of 3988 (5.0%)	0.0314	1	nuclear chromosome part	"Any constituent part of a nuclear chromosome, a chromosome found in the nucleus of a eukaryotic cell." [GOC:jl]	POL32(YJR043C);RAD5(YLR032W);RIF2(YLR453C);REV1(YOR346W);POL31(YJR006W)
GO:0000781	2 of 36 (5.6%)	0.30	6.71	33 of 3988 (0.8%)	0.0351	1	chromosome, telomeric region	"The terminal region of a linear chromosome that includes the telomeric DNA repeats and associated proteins." [GOC:elh]	RIF2(YLR453C);ELG1(YOR144C)
GO:0019774	1 of 36 (2.8%)	0.04	27.69	4 of 3988 (0.1%)	0.0356	1	proteasome core complex, beta-subunit complex	"The proteasome core subcomplex that constitutes the two inner rings of the proteasome core complex. An example of this component is found in Mus musculus." [GOC:jl, GOC:mtg_sensu, GOC:rb, PMID:10854779]	PUP3(YER094C)
GO:0043596	2 of 36 (5.6%)	0.32	6.33	35 of 3988 (0.9%)	0.0391	1	nuclear replication fork	"The Y-shaped region of a nuclear replicating DNA molecule, resulting from the separation of the DNA strands and in which the synthesis of new strands takes place. Also includes associated protein complexes." [GOC:jl, GOC:mtg_sensu]	POL32(YJR043C);POL31(YJR006W)
GO:0005634	19 of 36 (52.8%)	13.53	1.40	1499 of 3988 (37.6%)	0.0447	1	nucleus	"A membrane-bounded organelle of eukaryotic cells in which chromosomes are housed and replicated. In most cells, the nucleus contains all of the cell's chromosomes except the organellar chromosomes, and is the site of RNA synthesis and processing. In some species, or in specialized cell types, RNA metabolism or DNA replication may be absent." [GOC:go_curators]	TBS1(YBR150C);GPD1(YDL022W);LIN1(YHR156C);SKN7(YHR206W);POL32(YJR043C);RAD27(YKL113C);RAD5(YLR032W);RIF2(YLR453C);YML108W(YML108W);PSO2(YMR137C);ELG1(YOR144C);REV1(YOR346W);ACM1(YPL267W);RFC5(YBR087W);CDC28(YBR160W);PUP3(YER094C);POL31(YJR006W);RPC37(YKR025W);RFC4(YOL094C)
GO:0000228	5 of 36 (13.9%)	1.98	2.53	219 of 3988 (5.5%)	0.0448	1	nuclear chromosome	"A chromosome found in the nucleus of a eukaryotic cell." [GOC:mah]	POL32(YJR043C);RAD5(YLR032W);RIF2(YLR453C);REV1(YOR346W);POL31(YJR006W)

## Sheet: Randomization 3
BIOLOGICAL_PROCESS
GO_term	set	expected	enrichment	background	p_fisher(1side)	fdr	Name	Description
GO:0006272	5 of 35 (14.3%)	0.08	63.30	9 of 3988 (0.2%)	4.76e-09	1.85e-05	leading strand elongation	"The synthesis of DNA from a template strand in the 5' to 3' direction; leading strand elongation is continuous as it proceeds in the same direction as the replication fork." [ISBN:071673706X, ISBN:0815316194]	POL32(YJR043C);RFC5(YBR087W);POL3(YDL102W);POL31(YJR006W);RFC4(YOL094C)
GO:0006271	6 of 35 (17.1%)	0.21	28.49	24 of 3988 (0.6%)	3.51e-08	5.96e-05	DNA strand elongation involved in DNA replication	"The process in which a DNA strand is synthesized from template DNA during replication by the action of polymerases, which add nucleotides to the 3' end of the nascent DNA strand." [ISBN:071673706X, ISBN:0815316194]	POL32(YJR043C);RAD27(YKL113C);RFC5(YBR087W);POL3(YDL102W);POL31(YJR006W);RFC4(YOL094C)
GO:0022616	6 of 35 (17.1%)	0.22	27.35	25 of 3988 (0.6%)	4.58e-08	5.96e-05	DNA strand elongation	"The DNA metabolic process in which a DNA strand is synthesized by adding nucleotides to the 3' end of an existing DNA stand." [GOC:isa_complete]	POL32(YJR043C);RAD27(YKL113C);RFC5(YBR087W);POL3(YDL102W);POL31(YJR006W);RFC4(YOL094C)
GO:0043137	4 of 35 (11.4%)	0.06	65.11	7 of 3988 (0.2%)	1.71e-07	0.000167	DNA replication, removal of RNA primer	"Removal of the Okazaki RNA primer from the lagging strand of replicating DNA, by a combination of the actions of DNA polymerase, DNA helicase and an endonuclease." [GOC:jl, PMID:12424238]	POL32(YJR043C);RAD27(YKL113C);POL3(YDL102W);POL31(YJR006W)
GO:0006298	5 of 35 (14.3%)	0.15	33.51	17 of 3988 (0.4%)	2.22e-07	0.000173	mismatch repair	"A system for the correction of errors in which an incorrect base, which cannot form hydrogen bonds with the corresponding base in the parent strand, is incorporated into the daughter strand. The mismatch repair system promotes genomic fidelity by repairing base-base mismatches, insertion-deletion loops and heterologies generated during DNA replication and recombination." [ISBN:0198506732, PMID:1…	POL32(YJR043C);RFC5(YBR087W);POL3(YDL102W);POL31(YJR006W);RFC4(YOL094C)
GO:0006260	9 of 35 (25.7%)	1.01	8.92	115 of 3988 (2.9%)	3.79e-07	0.000246	DNA replication	"The cellular metabolic process in which a cell duplicates one or more molecules of DNA. DNA replication begins when specific sequences, known as origins of replication, are recognized and bound by initiation proteins, and ends when the original DNA molecule has been completely duplicated and the copies topologically separated. The unit of replication usually corresponds to the genome of the cell…	POL32(YJR043C);RAD27(YKL113C);RIF2(YLR453C);ELG1(YOR144C);REV1(YOR346W);RFC5(YBR087W);POL3(YDL102W);POL31(YJR006W);RFC4(YOL094C)
GO:0033567	4 of 35 (11.4%)	0.08	50.64	9 of 3988 (0.2%)	6.08e-07	0.000338	DNA replication, Okazaki fragment processing	"The DNA metabolic process, occurring during lagging strand synthesis, by which RNA primers are removed from Okazaki fragments, the resulting gaps filled by DNA polymerization, and the ends ligated to form a continuous strand." [GOC:mah, ISBN:0716720094]	POL32(YJR043C);RAD27(YKL113C);POL3(YDL102W);POL31(YJR006W)
GO:0006301	5 of 35 (14.3%)	0.20	24.77	23 of 3988 (0.6%)	1.16e-06	0.000567	postreplication repair	"The conversion of DNA-damage induced single-stranded gaps into large molecular weight DNA after replication. Includes pathways that remove replication-blocking lesions in conjunction with DNA replication." [GOC:elh]	POL32(YJR043C);RAD5(YLR032W);REV1(YOR346W);POL3(YDL102W);POL31(YJR006W)
GO:0006273	4 of 35 (11.4%)	0.11	35.06	13 of 3988 (0.3%)	3.36e-06	0.00131	lagging strand elongation	"The synthesis of DNA from a template strand in a net 3' to 5' direction. Lagging strand DNA elongation proceeds by discontinuous synthesis of short stretches of DNA, known as Okazaki fragments, from RNA primers; these fragments are then joined by DNA ligase. Although each segment of nascent DNA is synthesized in the 5' to 3' direction, the overall direction of lagging strand synthesis is 3' to 5…	POL32(YJR043C);RAD27(YKL113C);POL3(YDL102W);POL31(YJR006W)
GO:0006284	4 of 35 (11.4%)	0.11	35.06	13 of 3988 (0.3%)	3.36e-06	0.00131	base-excision repair	"In base excision repair, an altered base is removed by a DNA glycosylase enzyme, followed by excision of the resulting sugar phosphate. The small gap left in the DNA helix is filled in by the sequential action of DNA polymerase and DNA ligase." [ISBN:0815316194]	POL32(YJR043C);RAD27(YKL113C);POL3(YDL102W);POL31(YJR006W)
GO:0006281	10 of 35 (28.6%)	1.73	5.78	197 of 3988 (4.9%)	4.28e-06	0.00152	DNA repair	"The process of restoring DNA after damage. Genomes are subject to damage by chemical and physical agents in the environment (e.g. UV and ionizing radiations, chemical mutagens, fungal and bacterial toxins, etc.) and by free radicals or alkylating agents endogenously generated in metabolism. DNA is also damaged because of errors during its replication. A variety of different DNA repair pathways h…	POL32(YJR043C);RAD27(YKL113C);RAD5(YLR032W);PSO2(YMR137C);ELG1(YOR144C);REV1(YOR346W);RFC5(YBR087W);POL3(YDL102W);POL31(YJR006W);RFC4(YOL094C)
GO:0006261	7 of 35 (20.0%)	0.73	9.61	83 of 3988 (2.1%)	5.5e-06	0.00179	DNA-dependent DNA replication	"A DNA replication process that uses parental DNA as a template for the DNA-dependent DNA polymerases that synthesize the new strands." [GOC:mah, ISBN:0198506732]	POL32(YJR043C);RAD27(YKL113C);ELG1(YOR144C);RFC5(YBR087W);POL3(YDL102W);POL31(YJR006W);RFC4(YOL094C)
GO:0006278	4 of 35 (11.4%)	0.15	26.81	17 of 3988 (0.4%)	1.09e-05	0.00327	RNA-dependent DNA replication	"A DNA replication process that uses RNA as a template for RNA-dependent DNA polymerases (e.g. reverse transcriptase) that synthesize the new strands." [GOC:mah, ISBN:0198506732]	POL32(YJR043C);RIF2(YLR453C);POL3(YDL102W);POL31(YJR006W)
GO:0006974	10 of 35 (28.6%)	2.01	4.98	229 of 3988 (5.7%)	1.65e-05	0.00459	response to DNA damage stimulus	"Any process that results in a change in state or activity of a cell (in terms of movement, secretion, enzyme production, gene expression, etc.) as a result of a stimulus indicating damage to its DNA from environmental insults or errors during metabolism." [GOC:go_curators]	POL32(YJR043C);RAD27(YKL113C);RAD5(YLR032W);PSO2(YMR137C);ELG1(YOR144C);REV1(YOR346W);RFC5(YBR087W);POL3(YDL102W);POL31(YJR006W);RFC4(YOL094C)
GO:0033554	13 of 35 (37.1%)	3.73	3.49	425 of 3988 (10.7%)	3.12e-05	0.00809	cellular response to stress	"Any process that results in a change in state or activity of a cell (in terms of movement, secretion, enzyme production, gene expression, etc.) as a result of a stimulus indicating the organism is under stress. The stress is usually, but not necessarily, exogenous (e.g. temperature, humidity, ionizing radiation)." [GOC:mah]	GPD1(YDL022W);SKN7(YHR206W);POL32(YJR043C);RAD27(YKL113C);RAD5(YLR032W);PSO2(YMR137C);YNL190W(YNL190W);ELG1(YOR144C);REV1(YOR346W);RFC5(YBR087W);POL3(YDL102W);POL31(YJR006W);RFC4(YOL094C)
GO:0006259	11 of 35 (31.4%)	3.01	3.65	343 of 3988 (8.6%)	0.000102	0.0249	DNA metabolic process	"Any cellular metabolic process involving deoxyribonucleic acid. This is one of the two main types of nucleic acid, consisting of a long, unbranched macromolecule formed from one, or more commonly, two, strands of linked deoxyribonucleotides." [ISBN:0198506732]	POL32(YJR043C);RAD27(YKL113C);RAD5(YLR032W);RIF2(YLR453C);PSO2(YMR137C);ELG1(YOR144C);REV1(YOR346W);RFC5(YBR087W);POL3(YDL102W);POL31(YJR006W);RFC4(YOL094C)
GO:0006950	14 of 35 (40.0%)	4.84	2.89	552 of 3988 (13.8%)	0.000113	0.026	response to stress	"Any process that results in a change in state or activity of a cell or an organism (in terms of movement, secretion, enzyme production, gene expression, etc.) as a result of a disturbance in organismal or cellular homeostasis, usually, but not necessarily, exogenous (e.g. temperature, humidity, ionizing radiation)." [GOC:mah]	PAU24(YBR301W);GPD1(YDL022W);SKN7(YHR206W);POL32(YJR043C);RAD27(YKL113C);RAD5(YLR032W);PSO2(YMR137C);YNL190W(YNL190W);ELG1(YOR144C);REV1(YOR346W);RFC5(YBR087W);POL3(YDL102W);POL31(YJR006W);RFC4(YOL094C)
GO:0071897	3 of 35 (8.6%)	0.13	22.79	15 of 3988 (0.4%)	0.000262	0.0568	DNA biosynthetic process	"The cellular DNA metabolic process resulting in the formation of DNA, deoxyribonucleic acid, one of the two main types of nucleic acid, consisting of a long unbranched macromolecule formed from one or two strands of linked deoxyribonucleotides, the 3'-phosphate group of each constituent deoxyribonucleotide being joined in 3',5'-phosphodiester linkage to the 5'-hydroxyl group of the deoxyribose m…	RAD27(YKL113C);RAD5(YLR032W);REV1(YOR346W)
GO:0006302	5 of 35 (14.3%)	0.64	7.80	73 of 3988 (1.8%)	0.000379	0.0777	double-strand break repair	"The repair of double-strand breaks in DNA via homologous and nonhomologous mechanisms to reform a continuous DNA helix." [GOC:elh]	POL32(YJR043C);RAD27(YKL113C);RAD5(YLR032W);PSO2(YMR137C);ELG1(YOR144C)
GO:0051716	14 of 35 (40.0%)	5.72	2.45	652 of 3988 (16.3%)	0.000682	0.133	cellular response to stimulus	"Any process that results in a change in state or activity of a cell (in terms of movement, secretion, enzyme production, gene expression, etc.) as a result of a stimulus. The process begins with detection of the stimulus by a cell and ends with a change in state or activity or the cell." [GOC:bf, GOC:jl]	GPD1(YDL022W);SKN7(YHR206W);POL32(YJR043C);RAD27(YKL113C);RAD5(YLR032W);PSO2(YMR137C);YNL190W(YNL190W);ELG1(YOR144C);REV1(YOR346W);RFC5(YBR087W);POL3(YDL102W);EXO70(YJL085W);POL31(YJR006W);RFC4(YOL094C)
GO:0050896	16 of 35 (45.7%)	7.28	2.20	830 of 3988 (20.8%)	0.000788	0.146	response to stimulus	"Any process that results in a change in state or activity of a cell or an organism (in terms of movement, secretion, enzyme production, gene expression, etc.) as a result of a stimulus. The process begins with detection of the stimulus and ends with a change in state or activity or the cell or organism." [GOC:ai, GOC:bf]	PAU24(YBR301W);GPD1(YDL022W);SKN7(YHR206W);POL32(YJR043C);RAD27(YKL113C);STE6(YKL209C);RAD5(YLR032W);PSO2(YMR137C);YNL190W(YNL190W);ELG1(YOR144C);REV1(YOR346W);RFC5(YBR087W);POL3(YDL102W);EXO70(YJL085W);POL31(YJR006W);RFC4(YOL094C)
GO:0042276	2 of 35 (5.7%)	0.09	22.79	10 of 3988 (0.3%)	0.00322	0.571	error-prone translesion synthesis	"The conversion of DNA-damage induced single-stranded gaps into large molecular weight DNA after replication by using a specialized DNA polymerase or replication complex to insert a defined nucleotide across the lesion. This process does not remove the replication-blocking lesions and causes an increase in the endogenous mutation level. For example, in E. coli, a low fidelity DNA polymerase, pol …	RAD5(YLR032W);REV1(YOR346W)
GO:0065008	8 of 35 (22.9%)	2.66	3.01	303 of 3988 (7.6%)	0.00388	0.657	regulation of biological quality	"Any process that modulates a qualitative or quantitative trait of a biological quality. A biological quality is a measurable attribute of an organism or part of an organism, such as size, mass, shape, color, etc." [GOC:dph, GOC:isa_complete, GOC:mah, GOC:pr, GOC:vw]	GPD1(YDL022W);SKN7(YHR206W);MNR2(YKL064W);STE6(YKL209C);RAD5(YLR032W);RIF2(YLR453C);ELG1(YOR144C);FSF1(YOR271C)
GO:0006289	3 of 35 (8.6%)	0.33	9.00	38 of 3988 (1.0%)	0.00423	0.688	nucleotide-excision repair	"A DNA repair process in which a small region of the strand surrounding the damage is removed from the DNA helix as an oligonucleotide. The small gap left in the DNA helix is filled in by the sequential action of DNA polymerase and DNA ligase. Nucleotide excision repair recognizes a wide range of substrates, including damage caused by UV irradiation (pyrimidine dimers and 6-4 photoproducts) and c…	POL32(YJR043C);POL3(YDL102W);POL31(YJR006W)
GO:0019985	2 of 35 (5.7%)	0.11	18.99	12 of 3988 (0.3%)	0.00467	0.729	translesion synthesis	"The replication of damaged DNA by synthesis across a lesion in the template strand; a specialized DNA polymerase or replication complex inserts a defined nucleotide across from the lesion which allows DNA synthesis to continue beyond the lesion. This process can be mutagenic depending on the damaged nucleotide and the inserted nucleotide." [GOC:elh, PMID:10535901]	RAD5(YLR032W);REV1(YOR346W)
GO:0007062	3 of 35 (8.6%)	0.36	8.34	41 of 3988 (1.0%)	0.00526	0.768	sister chromatid cohesion	"The cell cycle process in which the sister chromatids of a replicated chromosome are joined along the entire length of the chromosome." [GOC:mah, ISBN:0815316194]	ELG1(YOR144C);RFC5(YBR087W);RFC4(YOL094C)
GO:0006401	4 of 35 (11.4%)	0.72	5.56	82 of 3988 (2.1%)	0.00535	0.768	RNA catabolic process	"The chemical reactions and pathways resulting in the breakdown of RNA, ribonucleic acid, one of the two main type of nucleic acid, consisting of a long, unbranched macromolecule formed from ribonucleotides joined in 3',5'-phosphodiester linkage." [ISBN:0198506732]	POL32(YJR043C);RAD27(YKL113C);POL3(YDL102W);POL31(YJR006W)
GO:0042592	6 of 35 (17.1%)	1.67	3.60	190 of 3988 (4.8%)	0.00552	0.768	homeostatic process	"Any biological process involved in the maintenance of an internal steady state." [GOC:jl, ISBN:0395825172]	GPD1(YDL022W);MNR2(YKL064W);RAD5(YLR032W);RIF2(YLR453C);ELG1(YOR144C);FSF1(YOR271C)
GO:0006973	1 of 35 (2.9%)	0.01	113.94	1 of 3988 (0.0%)	0.00878	0.815	intracellular accumulation of glycerol	"The accumulation of glycerol within a cell, for example by increased glycerol biosynthesis combined with decreased permeability of the cell membrane to glycerol, in response to the detection of a hyperosmotic environment." [GOC:jl, PMID:11752666]	GPD1(YDL022W)
GO:0010961	1 of 35 (2.9%)	0.01	113.94	1 of 3988 (0.0%)	0.00878	0.815	cellular magnesium ion homeostasis	"Any process involved in the maintenance of an internal steady state of magnesium ions at the level of a cell." [GOC:dph, GOC:tb]	MNR2(YKL064W)
GO:0010960	1 of 35 (2.9%)	0.01	113.94	1 of 3988 (0.0%)	0.00878	0.815	magnesium ion homeostasis	"Any process involved in the maintenance of an internal steady state of magnesium ions within an organism or cell." [GOC:dph, GOC:tb]	MNR2(YKL064W)
GO:0006286	1 of 35 (2.9%)	0.01	113.94	1 of 3988 (0.0%)	0.00878	0.815	base-excision repair, base-free sugar-phosphate removal	"Excision of the sugar phosphate residue at an AP site, i.e. a deoxyribose sugar with a missing base, by a phosphodiesterase enzyme." [ISBN:0815316194]	RAD27(YKL113C)
GO:0000770	1 of 35 (2.9%)	0.01	113.94	1 of 3988 (0.0%)	0.00878	0.815	peptide pheromone export	"The directed movement of a peptide pheromone out of a cell by a secretion or export pathway used solely for the export of peptide pheromones." [GOC:elh]	STE6(YKL209C)
GO:0030072	1 of 35 (2.9%)	0.01	113.94	1 of 3988 (0.0%)	0.00878	0.815	peptide hormone secretion	"The regulated release of a peptide hormone from a cell or organ." [GOC:mah]	STE6(YKL209C)
GO:0002790	1 of 35 (2.9%)	0.01	113.94	1 of 3988 (0.0%)	0.00878	0.815	peptide secretion	"The controlled release of a peptide from a cell or group of cells." [GOC:add]	STE6(YKL209C)
GO:0046879	1 of 35 (2.9%)	0.01	113.94	1 of 3988 (0.0%)	0.00878	0.815	hormone secretion	"The regulated release of hormones, substances with a specific regulatory effect on a particular organ or group of cells." [ISBN:0198506732]	STE6(YKL209C)
GO:0009914	1 of 35 (2.9%)	0.01	113.94	1 of 3988 (0.0%)	0.00878	0.815	hormone transport	"The directed movement of hormones into, out of or within a cell, or between cells, by means of some agent such as a transporter or pore." [GOC:tb]	STE6(YKL209C)
GO:0023061	1 of 35 (2.9%)	0.01	113.94	1 of 3988 (0.0%)	0.00878	0.815	signal release	"The process in which a signal is secreted or discharged into the extracellular medium from a cellular source." [GOC:mtg_signal]	STE6(YKL209C)
GO:0010817	1 of 35 (2.9%)	0.01	113.94	1 of 3988 (0.0%)	0.00878	0.815	regulation of hormone levels	"Any process that modulates the levels of hormone within an organism or a tissue. A hormone is any substance formed in very small amounts in one specialized organ or group of cells and carried (sometimes in the bloodstream) to another organ or group of cells in the same organism, upon which it has a specific regulatory action." [GOC:BHF, GOC:dph, GOC:tb]	STE6(YKL209C)
GO:0003001	1 of 35 (2.9%)	0.01	113.94	1 of 3988 (0.0%)	0.00878	0.815	generation of a signal involved in cell-cell signaling	"The cellular process that creates a physical entity or change in state, i.e. a signal, that originates in one cell and is used to transfer information to another cell. This process begins with the initial formation of the signal and ends with the mature form and placement of the signal." [GOC:dph]	STE6(YKL209C)
GO:0007267	1 of 35 (2.9%)	0.01	113.94	1 of 3988 (0.0%)	0.00878	0.815	cell-cell signaling	"Any process that mediates the transfer of information from one cell to another." [GOC:mah]	STE6(YKL209C)
GO:0006287	1 of 35 (2.9%)	0.01	113.94	1 of 3988 (0.0%)	0.00878	0.815	base-excision repair, gap-filling	"Repair of the damaged strand by the combined action of an apurinic endouclease that degrades a few bases on the damaged strand and a polymerase that synthesizes a 'patch' in the 5' to 3' direction, using the undamaged strand as a template." [ISBN:1550091131]	POL3(YDL102W)
GO:0046168	1 of 35 (2.9%)	0.02	56.97	2 of 3988 (0.1%)	0.0175	1	glycerol-3-phosphate catabolic process	"The chemical reactions and pathways resulting in the breakdown of glycerol-3-phosphate, a phosphoric monoester of glycerol." [GOC:ai]	GPD1(YDL022W)
GO:0034553	1 of 35 (2.9%)	0.02	56.97	2 of 3988 (0.1%)	0.0175	1	mitochondrial respiratory chain complex II assembly	"The aggregation, arrangement and bonding together of a set of components to form respiratory chain complex II, in the mitochondrial inner membrane." [GOC:dgf]	YDR379C-A(YDR379C-A)
GO:0034552	1 of 35 (2.9%)	0.02	56.97	2 of 3988 (0.1%)	0.0175	1	respiratory chain complex II assembly	"The aggregation, arrangement and bonding together of a set of components to form respiratory chain complex II." [GOC:dgf]	YDR379C-A(YDR379C-A)
GO:0097032	1 of 35 (2.9%)	0.02	56.97	2 of 3988 (0.1%)	0.0175	1	mitochondrial respiratory chain complex II biogenesis	"The biogenesis of a mitochondrial respiratory chain complex II, a protein complex located in the mitochondrial inner membrane that forms part of the mitochondrial respiratory chain. Includes the synthesis of constituent proteins and their aggregation, arrangement and bonding together." [GOC:pr]	YDR379C-A(YDR379C-A)
GO:0000734	1 of 35 (2.9%)	0.02	56.97	2 of 3988 (0.1%)	0.0175	1	gene conversion at mating-type locus, DNA repair synthesis	"Synthesis of DNA that proceeds from the broken 3' single-strand DNA end uses the homologous intact duplex as the template during gene conversion at the mating-type locus." [GOC:elh]	RAD27(YKL113C)
GO:0042631	1 of 35 (2.9%)	0.02	56.97	2 of 3988 (0.1%)	0.0175	1	cellular response to water deprivation	"Any process that results in a change in state or activity of a cell (in terms of movement, secretion, enzyme production, gene expression, etc.) as a result of deprivation of water." [GOC:go_curators]	YNL190W(YNL190W)
GO:0009414	1 of 35 (2.9%)	0.02	56.97	2 of 3988 (0.1%)	0.0175	1	response to water deprivation	"Any process that results in a change in state or activity of a cell or an organism (in terms of movement, secretion, enzyme production, gene expression, etc.) as a result of a water deprivation stimulus, prolonged deprivation of water." [GOC:lr]	YNL190W(YNL190W)
GO:0045004	1 of 35 (2.9%)	0.02	56.97	2 of 3988 (0.1%)	0.0175	1	DNA replication proofreading	"Correction of replication errors by DNA polymerase using a 3'-5' exonuclease activity." [GOC:ai]	POL3(YDL102W)
GO:0006297	1 of 35 (2.9%)	0.02	56.97	2 of 3988 (0.1%)	0.0175	1	nucleotide-excision repair, DNA gap filling	"Repair of the gap in the DNA helix by DNA polymerase and DNA ligase after the portion of the strand containing the lesion has been removed by pyrimidine-dimer repair enzymes." [ISBN:0815316194]	POL3(YDL102W)
GO:0006072	1 of 35 (2.9%)	0.03	37.98	3 of 3988 (0.1%)	0.0261	1	glycerol-3-phosphate metabolic process	"The chemical reactions and pathways involving glycerol-3-phosphate, a phosphoric monoester of glycerol." [GOC:go_curators, ISBN:0198506732]	GPD1(YDL022W)
GO:0000304	1 of 35 (2.9%)	0.03	37.98	3 of 3988 (0.1%)	0.0261	1	response to singlet oxygen	"Any process that results in a change in state or activity of a cell or an organism (in terms of movement, secretion, enzyme production, gene expression, etc.) as a result of a singlet oxygen stimulus. Singlet oxygen is a dioxygen (O2) molecule in which two 2p electrons have similar spin. Singlet oxygen is more highly reactive than the form in which these electrons are of opposite spin, and it is…	SKN7(YHR206W)
GO:0010994	1 of 35 (2.9%)	0.03	37.98	3 of 3988 (0.1%)	0.0261	1	free ubiquitin chain polymerization	"The process of creating free ubiquitin chains, compounds composed of a large number of ubiquitin monomers. These chains are not conjugated to a protein." [GOC:BHF, GOC:dph, GOC:tb]	RAD5(YLR032W)
GO:0051436	1 of 35 (2.9%)	0.03	37.98	3 of 3988 (0.1%)	0.0261	1	negative regulation of ubiquitin-protein ligase activity involved in mitotic cell cycle	"Any process that stops, prevents, or reduces the frequency, rate or extent of ubiquitin ligase activity that contributes to the mitotic cell cycle." [GOC:ai, GOC:tb]	ACM1(YPL267W)
GO:0044265	6 of 35 (17.1%)	2.34	2.56	267 of 3988 (6.7%)	0.0267	1	cellular macromolecule catabolic process	"The chemical reactions and pathways resulting in the breakdown of a macromolecule, any large molecule including proteins, nucleic acids and carbohydrates, as carried out by individual cells." [CHEBI:33694, GOC:jl]	DAS1(YJL149W);POL32(YJR043C);RAD27(YKL113C);POL3(YDL102W);PUP3(YER094C);POL31(YJR006W)
GO:0034655	5 of 35 (14.3%)	1.74	2.88	198 of 3988 (5.0%)	0.0276	1	nucleobase-containing compound catabolic process	"The chemical reactions and pathways resulting in the breakdown of nucleobases, nucleosides, nucleotides and nucleic acids." [GOC:mah]	POL32(YJR043C);RAD27(YKL113C);STE6(YKL209C);POL3(YDL102W);POL31(YJR006W)
GO:0034645	14 of 35 (40.0%)	8.63	1.62	983 of 3988 (24.6%)	0.0318	1	cellular macromolecule biosynthetic process	"The chemical reactions and pathways resulting in the formation of a macromolecule, any molecule of high relative molecular mass, the structure of which essentially comprises the multiple repetition of units derived, actually or conceptually, from molecules of low relative molecular mass, carried out by individual cells." [CHEBI:33694, GOC:mah]	TBS1(YBR150C);SKN7(YHR206W);POL32(YJR043C);RAD27(YKL113C);RAD5(YLR032W);RIF2(YLR453C);ELG1(YOR144C);REV1(YOR346W);ACM1(YPL267W);RFC5(YBR087W);POL3(YDL102W);POL31(YJR006W);RPC37(YKR025W);RFC4(YOL094C)
GO:0009059	14 of 35 (40.0%)	8.67	1.61	988 of 3988 (24.8%)	0.0332	1	macromolecule biosynthetic process	"The chemical reactions and pathways resulting in the formation of a macromolecule, any molecule of high relative molecular mass, the structure of which essentially comprises the multiple repetition of units derived, actually or conceptually, from molecules of low relative molecular mass." [CHEBI:33694, GOC:mah]	TBS1(YBR150C);SKN7(YHR206W);POL32(YJR043C);RAD27(YKL113C);RAD5(YLR032W);RIF2(YLR453C);ELG1(YOR144C);REV1(YOR346W);ACM1(YPL267W);RFC5(YBR087W);POL3(YDL102W);POL31(YJR006W);RPC37(YKR025W);RFC4(YOL094C)
GO:0071214	2 of 35 (5.7%)	0.29	6.91	33 of 3988 (0.8%)	0.0333	1	cellular response to abiotic stimulus	"Any process that results in a change in state or activity of a cell (in terms of movement, secretion, enzyme production, gene expression, etc.) as a result of an abiotic (non-living) stimulus." [GOC:mah]	GPD1(YDL022W);YNL190W(YNL190W)
GO:0019439	5 of 35 (14.3%)	1.84	2.71	210 of 3988 (5.3%)	0.0345	1	aromatic compound catabolic process	"The chemical reactions and pathways resulting in the breakdown of aromatic compounds, any substance containing an aromatic carbon ring." [GOC:ai]	POL32(YJR043C);RAD27(YKL113C);STE6(YKL209C);POL3(YDL102W);POL31(YJR006W)
GO:0000731	1 of 35 (2.9%)	0.04	28.49	4 of 3988 (0.1%)	0.0347	1	DNA synthesis involved in DNA repair	"Synthesis of DNA that proceeds from the broken 3' single-strand DNA end uses the homologous intact duplex as the template." [PMID:10357855]	RAD27(YKL113C)
GO:0010993	1 of 35 (2.9%)	0.04	28.49	4 of 3988 (0.1%)	0.0347	1	regulation of ubiquitin homeostasis	"Any process that modulates the rate, frequency, or extent of ubiquitin homeostasis. Ubiquitin homeostasis is any process involved in the maintenance of an internal steady state of ubiquitin monomers and free ubiquitin chains at the level of the cell." [GOC:BHF, GOC:dph, GOC:tb]	RAD5(YLR032W)
GO:0010992	1 of 35 (2.9%)	0.04	28.49	4 of 3988 (0.1%)	0.0347	1	ubiquitin homeostasis	"Any process involved in the maintenance of an internal steady state of ubiquitin monomers and free ubiquitin chains at the level of the cell." [GOC:BHF, GOC:dph, GOC:tb]	RAD5(YLR032W)
GO:0071462	1 of 35 (2.9%)	0.04	28.49	4 of 3988 (0.1%)	0.0347	1	cellular response to water stimulus	"Any process that results in a change in state or activity of a cell (in terms of movement, secretion, enzyme production, gene expression, etc.) as a result of a stimulus reflecting the presence, absence, or concentration of water." [GOC:mah]	YNL190W(YNL190W)
GO:0009415	1 of 35 (2.9%)	0.04	28.49	4 of 3988 (0.1%)	0.0347	1	response to water stimulus	"Any process that results in a change in state or activity of a cell or an organism (in terms of movement, secretion, enzyme production, gene expression, etc.) as a result of a stimulus reflecting the presence, absence, or concentration of water." [GOC:jl]	YNL190W(YNL190W)
GO:0051444	1 of 35 (2.9%)	0.04	28.49	4 of 3988 (0.1%)	0.0347	1	negative regulation of ubiquitin-protein ligase activity	"Any process that stops, prevents, or reduces the frequency, rate or extent of ubiquitin ligase activity, the catalysis of the reaction: ATP + ubiquitin + protein lysine = AMP + diphosphate + protein N-ubiquityllysine." [EC:6.3.2.19, GOC:ai, GOC:tb]	ACM1(YPL267W)
GO:0031397	1 of 35 (2.9%)	0.04	28.49	4 of 3988 (0.1%)	0.0347	1	negative regulation of protein ubiquitination	"Any process that stops, prevents, or reduces the frequency, rate or extent of the addition of ubiquitin groups to a protein." [GOC:mah]	ACM1(YPL267W)
GO:0051352	1 of 35 (2.9%)	0.04	28.49	4 of 3988 (0.1%)	0.0347	1	negative regulation of ligase activity	"Any process that stops or reduces the rate of ligase activity, the catalysis of the ligation of two substances with concomitant breaking of a diphosphate linkage, usually in a nucleoside triphosphate." [GOC:ai]	ACM1(YPL267W)
GO:0001927	1 of 35 (2.9%)	0.04	28.49	4 of 3988 (0.1%)	0.0347	1	exocyst assembly	"The aggregation, arrangement and bonding together of various polypeptides into the exocyst complex." [GOC:hjd, PMID:9700152, Wikipedia:Exocyst]	EXO70(YJL085W)
GO:0009057	6 of 35 (17.1%)	2.49	2.41	284 of 3988 (7.1%)	0.0348	1	macromolecule catabolic process	"The chemical reactions and pathways resulting in the breakdown of a macromolecule, any molecule of high relative molecular mass, the structure of which essentially comprises the multiple repetition of units derived, actually or conceptually, from molecules of low relative molecular mass." [CHEBI:33694, GOC:mah]	DAS1(YJL149W);POL32(YJR043C);RAD27(YKL113C);POL3(YDL102W);PUP3(YER094C);POL31(YJR006W)
GO:0090304	15 of 35 (42.9%)	9.64	1.56	1098 of 3988 (27.5%)	0.0361	1	nucleic acid metabolic process	"Any cellular metabolic process involving nucleic acids." [GOC:dph, GOC:tb]	TBS1(YBR150C);SKN7(YHR206W);POL32(YJR043C);RAD27(YKL113C);RAD5(YLR032W);RIF2(YLR453C);PSO2(YMR137C);ELG1(YOR144C);REV1(YOR346W);ACM1(YPL267W);RFC5(YBR087W);POL3(YDL102W);POL31(YJR006W);RPC37(YKR025W);RFC4(YOL094C)
GO:0044270	5 of 35 (14.3%)	1.90	2.64	216 of 3988 (5.4%)	0.0383	1	cellular nitrogen compound catabolic process	"The chemical reactions and pathways resulting in the breakdown of organic and inorganic nitrogenous compounds." [GOC:jl, ISBN:0198506732]	POL32(YJR043C);RAD27(YKL113C);STE6(YKL209C);POL3(YDL102W);POL31(YJR006W)
GO:0006139	17 of 35 (48.6%)	11.52	1.48	1313 of 3988 (32.9%)	0.0388	1	nucleobase-containing compound metabolic process	"Any cellular metabolic process involving nucleobases, nucleosides, nucleotides and nucleic acids." [GOC:ai]	TBS1(YBR150C);GPD1(YDL022W);SKN7(YHR206W);POL32(YJR043C);RAD27(YKL113C);STE6(YKL209C);RAD5(YLR032W);RIF2(YLR453C);PSO2(YMR137C);ELG1(YOR144C);REV1(YOR346W);ACM1(YPL267W);RFC5(YBR087W);POL3(YDL102W);POL31(YJR006W);RPC37(YKR025W);RFC4(YOL094C)
GO:0046700	5 of 35 (14.3%)	1.90	2.63	217 of 3988 (5.4%)	0.039	1	heterocycle catabolic process	"The chemical reactions and pathways resulting in the breakdown of heterocyclic compounds, those with a cyclic molecular structure and at least two different atoms in the ring (or rings)." [GOC:ai]	POL32(YJR043C);RAD27(YKL113C);STE6(YKL209C);POL3(YDL102W);POL31(YJR006W)
GO:0016567	3 of 35 (8.6%)	0.76	3.93	87 of 3988 (2.2%)	0.0397	1	protein ubiquitination	"The process in which one or more ubiquitin groups are added to a protein." [GOC:ai]	DAS1(YJL149W);RAD5(YLR032W);ACM1(YPL267W)
GO:1901361	5 of 35 (14.3%)	1.93	2.59	220 of 3988 (5.5%)	0.041	1	organic cyclic compound catabolic process	"The chemical reactions and pathways resulting in the breakdown of organic cyclic compound." [GOC:TermGenie]	POL32(YJR043C);RAD27(YKL113C);STE6(YKL209C);POL3(YDL102W);POL31(YJR006W)
GO:0000724	2 of 35 (5.7%)	0.32	6.16	37 of 3988 (0.9%)	0.0411	1	double-strand break repair via homologous recombination	"The error-free repair of a double-strand break in DNA in which the broken DNA molecule is repaired using homologous sequences. A strand in the broken DNA searches for a homologous region in an intact chromosome to serve as the template for DNA synthesis. The restoration of two intact DNA molecules results in the exchange, reciprocal or nonreciprocal, of genetic material between the intact DNA mo…	POL32(YJR043C);ELG1(YOR144C)
GO:0000160	1 of 35 (2.9%)	0.04	22.79	5 of 3988 (0.1%)	0.0431	1	phosphorelay signal transduction system	"A conserved series of molecular signals found in prokaryotes and eukaryotes; involves autophosphorylation of a histidine kinase and the transfer of the phosphate group to an aspartate that then acts as a phospho-donor to response regulator proteins." [PMID:9191038]	SKN7(YHR206W)
GO:0043619	1 of 35 (2.9%)	0.04	22.79	5 of 3988 (0.1%)	0.0431	1	regulation of transcription from RNA polymerase II promoter in response to oxidative stress	"Modulation of the frequency, rate or extent of transcription from an RNA polymerase II promoter as a result of a stimulus indicating the organism is under oxidative stress, a state often resulting from exposure to high levels of reactive oxygen species, e.g. superoxide anions, hydrogen peroxide (H2O2), and hydroxyl radicals." [GOC:jl]	SKN7(YHR206W)
GO:0051439	1 of 35 (2.9%)	0.04	22.79	5 of 3988 (0.1%)	0.0431	1	regulation of ubiquitin-protein ligase activity involved in mitotic cell cycle	"A cell cycle process that modulates the frequency, rate or extent of ubiquitin ligase activity that contributes to the mitotic cell cycle." [GOC:ai]	ACM1(YPL267W)
GO:0051601	1 of 35 (2.9%)	0.04	22.79	5 of 3988 (0.1%)	0.0431	1	exocyst localization	"Any process in which an exocyst is transported to, or maintained in, a specific location. An exocyst is a protein complex peripherally associated with the plasma membrane that determines where vesicles dock and fuse." [GOC:ai]	EXO70(YJL085W)
GO:1901575	9 of 35 (25.7%)	4.83	1.86	550 of 3988 (13.8%)	0.0432	1	organic substance catabolic process	"The chemical reactions and pathways resulting in the breakdown of an organic substance, any molecular entity containing carbon." [GOC:pr, GOC:TermGenie]	GPD1(YDL022W);DAS1(YJL149W);POL32(YJR043C);RAD27(YKL113C);STE6(YKL209C);PLB2(YMR006C);POL3(YDL102W);PUP3(YER094C);POL31(YJR006W)
GO:1901700	2 of 35 (5.7%)	0.34	5.84	39 of 3988 (1.0%)	0.0453	1	response to oxygen-containing compound	"Any process that results in a change in state or activity of a cell or an organism (in terms of movement, secretion, enzyme production, gene expression, etc.) as a result of an oxygen-containing compound stimulus." [GOC:pr, GOC:TermGenie]	SKN7(YHR206W);YNL190W(YNL190W)
GO:0046903	2 of 35 (5.7%)	0.35	5.70	40 of 3988 (1.0%)	0.0474	1	secretion	"The controlled release of a substance by a cell, a group of cells, or a tissue." [GOC:ai]	STE6(YKL209C);EXO70(YJL085W)
GO:0032940	2 of 35 (5.7%)	0.35	5.70	40 of 3988 (1.0%)	0.0474	1	secretion by cell	"The controlled release of a substance by a cell." [GOC:mah]	STE6(YKL209C);EXO70(YJL085W)
Depleted
GO:0010467	4 of 35 (11.4%)	9.55	0.42	1088 of 3988 (27.3%)	0.0209	1	gene expression	"The process in which a gene's sequence is converted into a mature gene product or products (proteins or RNA). This includes the production of an RNA transcript as well as any processing to produce a mature RNA product or an mRNA (for protein-coding genes) and the translation of that mRNA into protein. Some protein processing events may be included when they are required to form an active form of…	TBS1(YBR150C);SKN7(YHR206W);ACM1(YPL267W);RPC37(YKR025W)
GO:0044710	3 of 35 (8.6%)	7.79	0.38	888 of 3988 (22.3%)	0.0312	1	single-organism metabolic process	"A metabolic process - chemical reactions and pathways, including anabolism and catabolism, by which living organisms transform chemical substances - which involves a single organism." [GOC:jl]	GPD1(YDL022W);STE6(YKL209C);PLB2(YMR006C)
GO:0019538	4 of 35 (11.4%)	8.87	0.45	1011 of 3988 (25.4%)	0.0366	1	protein metabolic process	"The chemical reactions and pathways involving a specific protein, rather than of proteins in general. Includes protein modification." [GOC:ma]	DAS1(YJL149W);RAD5(YLR032W);ACM1(YPL267W);PUP3(YER094C)
GO:0006396	0 of 35 (0.0%)	3.11	0.00	354 of 3988 (8.9%)	0.0381	1	RNA processing	"Any process involved in the conversion of one or more primary RNA transcripts into one or more mature RNA molecules." [GOC:mah]
MOLECULAR_FUNCTION
GO_term	set	expected	enrichment	background	p_fisher(1side)	fdr	Name	Description
GO:0004527	5 of 35 (14.3%)	0.23	21.91	26 of 3988 (0.7%)	2.23e-06	0.00154	exonuclease activity	"Catalysis of the hydrolysis of ester linkages within nucleic acids by removing nucleotide residues from the 3' or 5' end." [GOC:mah, ISBN:0198547684]	POL32(YJR043C);RAD27(YKL113C);PSO2(YMR137C);POL3(YDL102W);POL31(YJR006W)
GO:0008310	3 of 35 (8.6%)	0.04	85.46	4 of 3988 (0.1%)	2.46e-06	0.00154	single-stranded DNA specific 3'-5' exodeoxyribonuclease activity	"Catalysis of the sequential cleavage of mononucleotides from a free 3' terminus of a single-stranded DNA molecule." [GOC:mah]	POL32(YJR043C);POL3(YDL102W);POL31(YJR006W)
GO:0008297	3 of 35 (8.6%)	0.04	85.46	4 of 3988 (0.1%)	2.46e-06	0.00154	single-stranded DNA specific exodeoxyribonuclease activity	"Catalysis of the sequential cleavage of mononucleotides from a free 5' or 3' terminus of a single-stranded DNA molecule." [GOC:mah]	POL32(YJR043C);POL3(YDL102W);POL31(YJR006W)
GO:0003887	4 of 35 (11.4%)	0.13	30.38	15 of 3988 (0.4%)	6.34e-06	0.00239	DNA-directed DNA polymerase activity	"Catalysis of the reaction: deoxynucleoside triphosphate + DNA(n) = diphosphate + DNA(n+1); the synthesis of DNA from deoxyribonucleotide triphosphates in the presence of a DNA template and primer." [EC:2.7.7.7, ISBN:0198547684]	POL32(YJR043C);REV1(YOR346W);POL3(YDL102W);POL31(YJR006W)
GO:0034061	4 of 35 (11.4%)	0.13	30.38	15 of 3988 (0.4%)	6.34e-06	0.00239	DNA polymerase activity	"Catalysis of the reaction: deoxynucleoside triphosphate + DNA(n) = diphosphate + DNA(n+1); the synthesis of DNA from deoxyribonucleotide triphosphates in the presence of a nucleic acid template and primer." [EC:2.7.7.7, GOC:mah]	POL32(YJR043C);REV1(YOR346W);POL3(YDL102W);POL31(YJR006W)
GO:0008296	3 of 35 (8.6%)	0.05	56.97	6 of 3988 (0.2%)	1.22e-05	0.00382	3'-5'-exodeoxyribonuclease activity	"Catalysis of the sequential cleavage of mononucleotides from a free 3' terminus of a DNA molecule." [GOC:mah]	POL32(YJR043C);POL3(YDL102W);POL31(YJR006W)
GO:0016895	3 of 35 (8.6%)	0.06	48.83	7 of 3988 (0.2%)	2.12e-05	0.00569	exodeoxyribonuclease activity, producing 5'-phosphomonoesters	"Catalysis of the hydrolysis of ester linkages within deoxyribonucleic acids by removing nucleotide residues from the 3' or 5' end to yield 5' phosphomonoesters." [GOC:ai]	POL32(YJR043C);POL3(YDL102W);POL31(YJR006W)
GO:0004529	3 of 35 (8.6%)	0.07	42.73	8 of 3988 (0.2%)	3.37e-05	0.00792	exodeoxyribonuclease activity	"Catalysis of the sequential cleavage of mononucleotides from a free 5' or 3' terminus of a DNA molecule." [GOC:mah, ISBN:0198547684]	POL32(YJR043C);POL3(YDL102W);POL31(YJR006W)
GO:0016779	5 of 35 (14.3%)	0.44	11.39	50 of 3988 (1.3%)	6.18e-05	0.0122	nucleotidyltransferase activity	"Catalysis of the transfer of a nucleotidyl group to a reactant." [ISBN:0198506732]	POL32(YJR043C);REV1(YOR346W);POL3(YDL102W);POL31(YJR006W);RPC37(YKR025W)
GO:0004536	4 of 35 (11.4%)	0.23	17.53	26 of 3988 (0.7%)	6.48e-05	0.0122	deoxyribonuclease activity	"Catalysis of the hydrolysis of ester linkages within deoxyribonucleic acid." [GOC:mah, ISBN:0198547684]	POL32(YJR043C);RAD27(YKL113C);POL3(YDL102W);POL31(YJR006W)
GO:0003677	11 of 35 (31.4%)	3.33	3.31	379 of 3988 (9.5%)	0.000252	0.0431	DNA binding	"Any molecular function by which a gene product interacts selectively and non-covalently with DNA (deoxyribonucleic acid)." [GOC:dph, GOC:jl, GOC:tb, GOC:vw]	TBS1(YBR150C);SKN7(YHR206W);RAD27(YKL113C);RAD5(YLR032W);RIF2(YLR453C);PSO2(YMR137C);REV1(YOR346W);RFC5(YBR087W);POL3(YDL102W);POL31(YJR006W);RFC4(YOL094C)
GO:0004518	5 of 35 (14.3%)	0.61	8.26	69 of 3988 (1.7%)	0.000291	0.0431	nuclease activity	"Catalysis of the hydrolysis of ester linkages within nucleic acids." [ISBN:0198547684]	POL32(YJR043C);RAD27(YKL113C);PSO2(YMR137C);POL3(YDL102W);POL31(YJR006W)
GO:0008408	3 of 35 (8.6%)	0.14	21.36	16 of 3988 (0.4%)	0.000321	0.0431	3'-5' exonuclease activity	"Catalysis of the hydrolysis of ester linkages within nucleic acids by removing nucleotide residues from the 3' end." [GOC:ai]	POL32(YJR043C);POL3(YDL102W);POL31(YJR006W)
GO:0016796	3 of 35 (8.6%)	0.14	21.36	16 of 3988 (0.4%)	0.000321	0.0431	exonuclease activity, active with either ribo- or deoxyribonucleic acids and producing 5'-phosphomonoesters	"Catalysis of the hydrolysis of ester linkages within nucleic acids by removing nucleotide residues from the 3' or 5' end to yield 5' phosphomonoesters." [GOC:mah]	POL32(YJR043C);POL3(YDL102W);POL31(YJR006W)
GO:0003689	2 of 35 (5.7%)	0.04	56.97	4 of 3988 (0.1%)	0.000444	0.0522	DNA clamp loader activity	"Catalysis of the reaction: ATP + H2O = ADP + phosphate, to drive the opening of the ring structure of the PCNA complex, or any of the related sliding clamp complexes, and their closing around the DNA duplex." [GOC:mah, GOC:vw, PMID:16082778]	RFC5(YBR087W);RFC4(YOL094C)
GO:0033170	2 of 35 (5.7%)	0.04	56.97	4 of 3988 (0.1%)	0.000444	0.0522	protein-DNA loading ATPase activity	"Catalysis of the reaction: ATP + H2O = ADP + phosphate, to drive the assembly of a protein or protein complex onto a DNA molecule." [GOC:mah, GOC:vw]	RFC5(YBR087W);RFC4(YOL094C)
GO:0008409	2 of 35 (5.7%)	0.04	45.58	5 of 3988 (0.1%)	0.000736	0.0814	5'-3' exonuclease activity	"Catalysis of the hydrolysis of ester linkages within nucleic acids by removing nucleotide residues from the 5' end." [GOC:ai]	RAD27(YKL113C);PSO2(YMR137C)
GO:0008094	3 of 35 (8.6%)	0.40	7.43	46 of 3988 (1.2%)	0.00726	0.718	DNA-dependent ATPase activity	"Catalysis of the reaction: ATP + H2O = ADP + phosphate; this reaction requires the presence of single- or double-stranded DNA, and it drives another reaction." [EC:3.6.1.3, GOC:jl]	RAD5(YLR032W);RFC5(YBR087W);RFC4(YOL094C)
GO:0016788	6 of 35 (17.1%)	1.82	3.30	207 of 3988 (5.2%)	0.00834	0.718	hydrolase activity, acting on ester bonds	"Catalysis of the hydrolysis of any ester bond." [GOC:jl]	POL32(YJR043C);RAD27(YKL113C);PLB2(YMR006C);PSO2(YMR137C);POL3(YDL102W);POL31(YJR006W)
GO:0017125	1 of 35 (2.9%)	0.01	113.94	1 of 3988 (0.0%)	0.00878	0.718	deoxycytidyl transferase activity	"Catalysis of the insertion of a dCMP residue opposite a template abasic site in DNA." [PMID:10535901]	REV1(YOR346W)
GO:0055105	1 of 35 (2.9%)	0.01	113.94	1 of 3988 (0.0%)	0.00878	0.718	ubiquitin-protein ligase inhibitor activity	"Stops, prevents or reduces the activity of a ubiquitin-protein ligase." [GOC:BHF, GOC:rl]	ACM1(YPL267W)
GO:0055104	1 of 35 (2.9%)	0.01	113.94	1 of 3988 (0.0%)	0.00878	0.718	ligase inhibitor activity	"Stops, prevents or reduces the activity of a ligase." [GOC:BHF, GOC:rl]	ACM1(YPL267W)
GO:0061133	1 of 35 (2.9%)	0.01	113.94	1 of 3988 (0.0%)	0.00878	0.718	endopeptidase activator activity	"Increases the activity of an endopeptidase, any enzyme that hydrolyzes nonterminal peptide bonds in polypeptides." [GOC:dph, GOC:tb]	PUP3(YER094C)
GO:0003676	12 of 35 (34.3%)	6.09	1.97	694 of 3988 (17.4%)	0.0119	0.932	nucleic acid binding	"Interacting selectively and non-covalently with any nucleic acid." [GOC:jl]	TBS1(YBR150C);YGR001C(YGR001C);SKN7(YHR206W);RAD27(YKL113C);RAD5(YLR032W);RIF2(YLR453C);PSO2(YMR137C);REV1(YOR346W);RFC5(YBR087W);POL3(YDL102W);POL31(YJR006W);RFC4(YOL094C)
GO:0003684	2 of 35 (5.7%)	0.19	10.36	22 of 3988 (0.6%)	0.0155	1	damaged DNA binding	"Interacting selectively and non-covalently with damaged DNA." [GOC:jl]	PSO2(YMR137C);REV1(YOR346W)
GO:0004367	1 of 35 (2.9%)	0.02	56.97	2 of 3988 (0.1%)	0.0175	1	glycerol-3-phosphate dehydrogenase [NAD+] activity	"Catalysis of the reaction: sn-glycerol 3-phosphate + NAD+ = glycerone phosphate + NADH + H+." [EC:1.1.1.8]	GPD1(YDL022W)
GO:0004622	1 of 35 (2.9%)	0.02	56.97	2 of 3988 (0.1%)	0.0175	1	lysophospholipase activity	"Catalysis of the reaction: 2-lysophosphatidylcholine + H2O = glycerophosphocholine + a carboxylate." [EC:3.1.1.5]	PLB2(YMR006C)
GO:0016504	1 of 35 (2.9%)	0.02	56.97	2 of 3988 (0.1%)	0.0175	1	peptidase activator activity	"Increases the activity of a peptidase, any enzyme that catalyzes the hydrolysis peptide bonds." [GOC:ai]	PUP3(YER094C)
GO:0017049	1 of 35 (2.9%)	0.02	56.97	2 of 3988 (0.1%)	0.0175	1	GTP-Rho binding	"Interacting selectively and non-covalently with the GTP-bound form of the Rho protein." [GOC:mah]	EXO70(YJL085W)
GO:0016787	11 of 35 (31.4%)	5.73	1.92	653 of 3988 (16.4%)	0.02	1	hydrolase activity	"Catalysis of the hydrolysis of various bonds, e.g. C-O, C-N, C-C, phosphoric anhydride bonds, etc. Hydrolase is the systematic name for any enzyme of EC class 3." [ISBN:0198506732]	POL32(YJR043C);RAD27(YKL113C);STE6(YKL209C);RAD5(YLR032W);PLB2(YMR006C);PSO2(YMR137C);RFC5(YBR087W);POL3(YDL102W);PUP3(YER094C);POL31(YJR006W);RFC4(YOL094C)
GO:0042623	4 of 35 (11.4%)	1.13	3.53	129 of 3988 (3.2%)	0.0252	1	ATPase activity, coupled	"Catalysis of the reaction: ATP + H2O = ADP + phosphate; this reaction directly drives some other reaction, for example ion transport across a membrane." [EC:3.6.1.3, GOC:jl]	STE6(YKL209C);RAD5(YLR032W);RFC5(YBR087W);RFC4(YOL094C)
GO:0015095	1 of 35 (2.9%)	0.03	37.98	3 of 3988 (0.1%)	0.0261	1	magnesium ion transmembrane transporter activity	"Catalysis of the transfer of magnesium (Mg) ions from one side of a membrane to the other." [GOC:dgf]	MNR2(YKL064W)
GO:0015440	1 of 35 (2.9%)	0.03	37.98	3 of 3988 (0.1%)	0.0261	1	peptide-transporting ATPase activity	"Catalysis of the reaction: ATP + H2O + peptide(in) = ADP + phosphate + peptide(out). Peptides exported include alpha-hemolysin, cyclolysin, colicin V and siderophores from Gram-negative bacteria, and bacteriocin, subtilin, competence factor and pediocin from Gram-positive bacteria." [EC:3.6.3.43]	STE6(YKL209C)
GO:0009378	1 of 35 (2.9%)	0.03	37.98	3 of 3988 (0.1%)	0.0261	1	four-way junction helicase activity	"Catalysis of the unwinding of the DNA helix of DNA containing four-way junctions, including Holliday junctions." [GOC:jl, PMID:9442895]	RAD5(YLR032W)
GO:0000403	1 of 35 (2.9%)	0.03	37.98	3 of 3988 (0.1%)	0.0261	1	Y-form DNA binding	"Interacting selectively and non-covalently with segment of DNA shaped like a Y. This shape occurs when DNA contains a region of paired double-stranded DNA on one end and a region of unpaired DNA strands on the opposite end." [GOC:elh, PMID:16781730]	RAD5(YLR032W)
GO:0000156	1 of 35 (2.9%)	0.04	28.49	4 of 3988 (0.1%)	0.0347	1	phosphorelay response regulator activity	"Responds to a phosphorelay sensor to initiate a change in cell state or activity. The activity of the response regulator is regulated by transfer of a phosphate from a histidine residue in the sensor, to an aspartate residue in the response regulator. Many but not all response regulators act as transcriptional regulators to elicit a response." [GOC:bf, PMID:10966457, PMID:11842140]	SKN7(YHR206W)
GO:0055106	1 of 35 (2.9%)	0.04	28.49	4 of 3988 (0.1%)	0.0347	1	ubiquitin-protein ligase regulator activity	"Modulates the activity of a ubiquitin-protein ligase, an enzyme that catalyzes the covalent attachment of ubiquitin to lysine in a substrate protein." [GOC:BHF, GOC:rl]	ACM1(YPL267W)
GO:0055103	1 of 35 (2.9%)	0.04	28.49	4 of 3988 (0.1%)	0.0347	1	ligase regulator activity	"Modulates the activity of a ligase." [GOC:BHF, GOC:rl]	ACM1(YPL267W)
GO:0061135	1 of 35 (2.9%)	0.04	28.49	4 of 3988 (0.1%)	0.0347	1	endopeptidase regulator activity	"Modulates the activity of a peptidase, any enzyme that hydrolyzes nonterminal peptide bonds in polypeptides." [GOC:dph, GOC:tb]	PUP3(YER094C)
GO:0017048	1 of 35 (2.9%)	0.04	28.49	4 of 3988 (0.1%)	0.0347	1	Rho GTPase binding	"Interacting selectively and non-covalently with Rho protein, any member of the Rho subfamily of the Ras superfamily of monomeric GTPases. Proteins in the Rho subfamily are involved in relaying signals from cell-surface receptors to the actin cytoskeleton." [ISBN:0198547684, PMID:12581856]	EXO70(YJL085W)
GO:0017108	1 of 35 (2.9%)	0.04	22.79	5 of 3988 (0.1%)	0.0431	1	5'-flap endonuclease activity	"Catalysis of the cleavage of a 5' flap structure in DNA, but not other DNA structures; processes the 5' ends of Okazaki fragments in lagging strand DNA synthesis." [PMID:9778254]	RAD27(YKL113C)
GO:0048256	1 of 35 (2.9%)	0.04	22.79	5 of 3988 (0.1%)	0.0431	1	flap endonuclease activity	"Catalysis of the cleavage of a flap structure in DNA, but not other DNA structures; processes the ends of Okazaki fragments in lagging strand DNA synthesis." [GOC:jid]	RAD27(YKL113C)
GO:0032934	1 of 35 (2.9%)	0.04	22.79	5 of 3988 (0.1%)	0.0431	1	sterol binding	"Interacting selectively and non-covalently with a sterol, any steroid containing a hydroxy group in the 3 position, closely related to cholestan-3-ol." [CHEBI:15889, GOC:mah]	PRY2(YKR013W)
GO:0005496	1 of 35 (2.9%)	0.04	22.79	5 of 3988 (0.1%)	0.0431	1	steroid binding	"Interacting selectively and non-covalently with a steroid, any of a large group of substances that have in common a ring system based on 1,2-cyclopentanoperhydrophenanthrene." [GOC:jl, ISBN:0198506732]	PRY2(YKR013W)
GO:0000400	1 of 35 (2.9%)	0.04	22.79	5 of 3988 (0.1%)	0.0431	1	four-way junction DNA binding	"Interacting selectively and non-covalently with DNA containing four-way junctions, also known as Holliday junctions, a structure where two DNA double strands are held together by reciprocal exchange of two of the four strands, one strand each from the two original helices." [GOC:krc, ISBN:0815332181, PMID:15563464]	RAD5(YLR032W)
GO:0004620	1 of 35 (2.9%)	0.04	22.79	5 of 3988 (0.1%)	0.0431	1	phospholipase activity	"Catalysis of the hydrolysis of a glycerophospholipid." [ISBN:0198506732]	PLB2(YMR006C)
GO:0061134	1 of 35 (2.9%)	0.04	22.79	5 of 3988 (0.1%)	0.0431	1	peptidase regulator activity	"Modulates the activity of a peptidase, any enzyme that catalyzes the hydrolysis peptide bonds." [GOC:dph, GOC:tb]	PUP3(YER094C)
CELLULAR_COMPONENT
GO_term	set	expected	enrichment	background	p_fisher(1side)	fdr	Name	Description
GO:0043625	3 of 35 (8.6%)	0.03	113.94	3 of 3988 (0.1%)	6.2e-07	0.000413	delta DNA polymerase complex	"A multimeric DNA polymerase enzyme complex which differs in composition amongst species; in humans it is a heterotetramer of four subunits of approximately 125, 50, 68 and 12kDa, while in S. cerevisiae, it has three different subunits which form a heterotrimer, and the active enzyme is a dimer of this heterotrimer. Functions in DNA replication, mismatch repair and excision repair." [GOC:jl, ISBN…	POL32(YJR043C);POL3(YDL102W);POL31(YJR006W)
GO:0005657	6 of 35 (17.1%)	0.36	16.67	41 of 3988 (1.0%)	1.05e-06	0.000413	replication fork	"The Y-shaped region of a replicating DNA molecule, resulting from the separation of the DNA strands and in which the synthesis of new strands takes place. Also includes associated protein complexes." [GOC:mah, ISBN:0198547684]	POL32(YJR043C);REV1(YOR346W);RFC5(YBR087W);POL3(YDL102W);POL31(YJR006W);RFC4(YOL094C)
GO:0031391	3 of 35 (8.6%)	0.04	85.46	4 of 3988 (0.1%)	2.46e-06	0.000644	Elg1 RFC-like complex	"A pentameric complex related to replication factor C, which loads the DNA polymerase processivity factor proliferating cell nuclear antigen (PCNA) onto DNA and has roles in telomere length regulation and other aspects of genome stability. In Saccharomyces the subunits are known as Elg1p, Rfc2p, Rfc3p, Rfc4p, and Rfc5p." [PMID:14614842]	ELG1(YOR144C);RFC5(YBR087W);RFC4(YOL094C)
GO:0042575	3 of 35 (8.6%)	0.07	42.73	8 of 3988 (0.2%)	3.37e-05	0.0066	DNA polymerase complex	"A protein complex that possesses DNA polymerase activity and is involved in template directed synthesis of DNA." [GOC:jl, PMID:12045093]	POL32(YJR043C);POL3(YDL102W);POL31(YJR006W)
GO:0044427	10 of 35 (28.6%)	2.27	4.40	259 of 3988 (6.5%)	4.83e-05	0.00758	chromosomal part	"Any constituent part of a chromosome, a structure composed of a very long molecule of DNA and associated proteins (e.g. histones) that carries hereditary information." [GOC:jl]	LIN1(YHR156C);POL32(YJR043C);RAD5(YLR032W);RIF2(YLR453C);ELG1(YOR144C);REV1(YOR346W);RFC5(YBR087W);POL3(YDL102W);POL31(YJR006W);RFC4(YOL094C)
GO:0005694	10 of 35 (28.6%)	2.49	4.01	284 of 3988 (7.1%)	0.000106	0.0139	chromosome	"A structure composed of a very long molecule of DNA and associated proteins (e.g. histones) that carries hereditary information." [ISBN:0198547684]	LIN1(YHR156C);POL32(YJR043C);RAD5(YLR032W);RIF2(YLR453C);ELG1(YOR144C);REV1(YOR346W);RFC5(YBR087W);POL3(YDL102W);POL31(YJR006W);RFC4(YOL094C)
GO:0043601	3 of 35 (8.6%)	0.12	24.42	14 of 3988 (0.4%)	0.000211	0.0195	nuclear replisome	"A multi-component enzymatic machine at the nuclear replication fork, which mediates DNA replication. Includes DNA primase, one or more DNA polymerases, DNA helicases, and other proteins." [GOC:jl, GOC:mtg_sensu]	POL32(YJR043C);POL3(YDL102W);POL31(YJR006W)
GO:0030894	3 of 35 (8.6%)	0.12	24.42	14 of 3988 (0.4%)	0.000211	0.0195	replisome	"A multi-component enzymatic machine at the replication fork which mediates DNA replication. Includes DNA primase, one or more DNA polymerases, DNA helicases, and other proteins." [GOC:mah, GOC:vw]	POL32(YJR043C);POL3(YDL102W);POL31(YJR006W)
GO:0005663	2 of 35 (5.7%)	0.03	75.96	3 of 3988 (0.1%)	0.000223	0.0195	DNA replication factor C complex	"A complex of five polypeptides in eukaryotes, and two in prokaryotes, that loads the DNA polymerase processivity factor proliferating cell nuclear antigen (PCNA) onto DNA, thereby permitting processive DNA synthesis catalyzed by DNA polymerase." [PMID:14614842, PMID:14646196, PMID:16172520]	RFC5(YBR087W);RFC4(YOL094C)
GO:0031389	2 of 35 (5.7%)	0.04	56.97	4 of 3988 (0.1%)	0.000444	0.0348	Rad17 RFC-like complex	"A pentameric protein complex related to replication factor C, which loads a trimeric complex of checkpoint proteins (known as the checkpoint clamp or 9-1-1 complex) onto DNA at damage sites; functions in DNA damage cell cycle checkpoints. In Schizosaccharomyces pombe the subunits are known as Rad17, Rfc2, Rfc3, Rfc4, and Rfc5, while in Saccharomyces cerevisiae the subunits are known as Rad24p, R…	RFC5(YBR087W);RFC4(YOL094C)
GO:0032993	4 of 35 (11.4%)	0.39	10.36	44 of 3988 (1.1%)	0.000526	0.0375	protein-DNA complex	"A macromolecular complex containing both protein and DNA molecules." [GOC:mah]	POL32(YJR043C);RIF2(YLR453C);POL3(YDL102W);POL31(YJR006W)
GO:0031390	2 of 35 (5.7%)	0.05	37.98	6 of 3988 (0.2%)	0.0011	0.0717	Ctf18 RFC-like complex	"A heptameric complex related to replication factor C, which loads the DNA polymerase processivity factor proliferating cell nuclear antigen (PCNA) onto DNA and plays a vital role in chromosome cohesion. In Saccharomyces the subunits are known as Ctf18p, Rfc2p, Rfc3p, Rfc4p, Rfc5p, Dcc1p, and Ctf8p." [PMID:14614842]	RFC5(YBR087W);RFC4(YOL094C)
GO:0043596	3 of 35 (8.6%)	0.31	9.77	35 of 3988 (0.9%)	0.00334	0.202	nuclear replication fork	"The Y-shaped region of a nuclear replicating DNA molecule, resulting from the separation of the DNA strands and in which the synthesis of new strands takes place. Also includes associated protein complexes." [GOC:jl, GOC:mtg_sensu]	POL32(YJR043C);POL3(YDL102W);POL31(YJR006W)
GO:0044454	6 of 35 (17.1%)	1.75	3.44	199 of 3988 (5.0%)	0.0069	0.386	nuclear chromosome part	"Any constituent part of a nuclear chromosome, a chromosome found in the nucleus of a eukaryotic cell." [GOC:jl]	POL32(YJR043C);RAD5(YLR032W);RIF2(YLR453C);REV1(YOR346W);POL3(YDL102W);POL31(YJR006W)
GO:0000228	6 of 35 (17.1%)	1.92	3.12	219 of 3988 (5.5%)	0.0109	0.568	nuclear chromosome	"A chromosome found in the nucleus of a eukaryotic cell." [GOC:mah]	POL32(YJR043C);RAD5(YLR032W);RIF2(YLR453C);REV1(YOR346W);POL3(YDL102W);POL31(YJR006W)
GO:0005576	3 of 35 (8.6%)	0.54	5.60	61 of 3988 (1.5%)	0.0157	0.771	extracellular region	"The space external to the outermost structure of a cell. For cells without external protective or external encapsulating structures this refers to space outside of the plasma membrane. This term covers the host cell environment outside an intracellular parasite." [GOC:go_curators]	PAU24(YBR301W);PRY2(YKR013W);PLB2(YMR006C)
GO:0009277	3 of 35 (8.6%)	0.55	5.43	63 of 3988 (1.6%)	0.0172	0.792	fungal-type cell wall	"A rigid yet dynamic structure surrounding the plasma membrane that affords protection from stresses and contributes to cell morphogenesis, consisting of extensively cross-linked glycoproteins and carbohydrates. The glycoproteins may be modified with N- or O-linked carbohydrates, or glycosylphosphatidylinositol (GPI) anchors; the polysaccharides are primarily branched glucans, including beta-link…	PAU24(YBR301W);PLB2(YMR006C);YNL190W(YNL190W)
GO:0005618	3 of 35 (8.6%)	0.58	5.18	66 of 3988 (1.7%)	0.0194	0.802	cell wall	"The rigid or semi-rigid envelope lying outside the cell membrane of plant, fungal, and most prokaryotic cells, maintaining their shape and protecting them from osmotic lysis. In plants it is made of cellulose and, often, lignin; in fungi it is composed largely of polysaccharides; in bacteria it is composed of peptidoglycan." [ISBN:0198547684]	PAU24(YBR301W);PLB2(YMR006C);YNL190W(YNL190W)
GO:0030312	3 of 35 (8.6%)	0.58	5.18	66 of 3988 (1.7%)	0.0194	0.802	external encapsulating structure	"A structure that lies outside the plasma membrane and surrounds the entire cell." [GOC:go_curators]	PAU24(YBR301W);PLB2(YMR006C);YNL190W(YNL190W)
GO:0009331	1 of 35 (2.9%)	0.03	37.98	3 of 3988 (0.1%)	0.0261	1	glycerol-3-phosphate dehydrogenase complex	"An enzyme complex that catalyzes the dehydrogenation of sn-glycerol 3-phosphate to form glycerone phosphate." [EC:1.1.5.3]	GPD1(YDL022W)
GO:0043332	3 of 35 (8.6%)	0.68	4.44	77 of 3988 (1.9%)	0.0291	1	mating projection tip	"The apex of the mating projection in unicellular fungi exposed to mating pheromone; site of polarized growth." [GOC:mcc]	STE6(YKL209C);YMR295C(YMR295C);EXO70(YJL085W)
GO:0044463	3 of 35 (8.6%)	0.70	4.27	80 of 3988 (2.0%)	0.0321	1	cell projection part	"Any constituent part of a cell projection, a prolongation or process extending from a cell, e.g. a flagellum or axon." [GOC:jl]	STE6(YKL209C);YMR295C(YMR295C);EXO70(YJL085W)
GO:0005634	19 of 35 (54.3%)	13.16	1.44	1499 of 3988 (37.6%)	0.0322	1	nucleus	"A membrane-bounded organelle of eukaryotic cells in which chromosomes are housed and replicated. In most cells, the nucleus contains all of the cell's chromosomes except the organellar chromosomes, and is the site of RNA synthesis and processing. In some species, or in specialized cell types, RNA metabolism or DNA replication may be absent." [GOC:go_curators]	TBS1(YBR150C);GPD1(YDL022W);LIN1(YHR156C);SKN7(YHR206W);POL32(YJR043C);RAD27(YKL113C);RAD5(YLR032W);RIF2(YLR453C);YML108W(YML108W);PSO2(YMR137C);ELG1(YOR144C);REV1(YOR346W);ACM1(YPL267W);RFC5(YBR087W);POL3(YDL102W);PUP3(YER094C);POL31(YJR006W);RPC37(YKR025W);RFC4(YOL094C)
GO:0000781	2 of 35 (5.7%)	0.29	6.91	33 of 3988 (0.8%)	0.0333	1	chromosome, telomeric region	"The terminal region of a linear chromosome that includes the telomeric DNA repeats and associated proteins." [GOC:elh]	RIF2(YLR453C);ELG1(YOR144C)
GO:0019774	1 of 35 (2.9%)	0.04	28.49	4 of 3988 (0.1%)	0.0347	1	proteasome core complex, beta-subunit complex	"The proteasome core subcomplex that constitutes the two inner rings of the proteasome core complex. An example of this component is found in Mus musculus." [GOC:jl, GOC:mtg_sensu, GOC:rb, PMID:10854779]	PUP3(YER094C)
GO:0005937	3 of 35 (8.6%)	0.76	3.93	87 of 3988 (2.2%)	0.0397	1	mating projection	"The projection formed by unicellular fungi in response to mating pheromone." [GOC:mcc]	STE6(YKL209C);YMR295C(YMR295C);EXO70(YJL085W)
GO:0042995	3 of 35 (8.6%)	0.76	3.93	87 of 3988 (2.2%)	0.0397	1	cell projection	"A prolongation or process extending from a cell, e.g. a flagellum or axon." [GOC:jl, http://www.cogsci.princeton.edu/~wn/]	STE6(YKL209C);YMR295C(YMR295C);EXO70(YJL085W)
GO:0043232	12 of 35 (34.3%)	7.31	1.64	833 of 3988 (20.9%)	0.0457	1	intracellular non-membrane-bounded organelle	"Organized structure of distinctive morphology and function, not bounded by a lipid bilayer membrane and occurring within the cell. Includes ribosomes, the cytoskeleton and chromosomes." [GOC:go_curators]	LIN1(YHR156C);POL32(YJR043C);RAD27(YKL113C);RAD5(YLR032W);RIF2(YLR453C);YMR295C(YMR295C);ELG1(YOR144C);REV1(YOR346W);RFC5(YBR087W);POL3(YDL102W);POL31(YJR006W);RFC4(YOL094C)
GO:0043228	12 of 35 (34.3%)	7.31	1.64	833 of 3988 (20.9%)	0.0457	1	non-membrane-bounded organelle	"Organized structure of distinctive morphology and function, not bounded by a lipid bilayer membrane. Includes ribosomes, the cytoskeleton and chromosomes." [GOC:go_curators]	LIN1(YHR156C);POL32(YJR043C);RAD27(YKL113C);RAD5(YLR032W);RIF2(YLR453C);YMR295C(YMR295C);ELG1(YOR144C);REV1(YOR346W);RFC5(YBR087W);POL3(YDL102W);POL31(YJR006W);RFC4(YOL094C)

## Sheet: Randomization 4
BIOLOGICAL_PROCESS
GO_term	set	expected	enrichment	background	p_fisher(1side)	fdr	Name	Description
GO:0006272	4 of 34 (11.8%)	0.08	52.13	9 of 3988 (0.2%)	5.39e-07	0.00203	leading strand elongation	"The synthesis of DNA from a template strand in the 5' to 3' direction; leading strand elongation is continuous as it proceeds in the same direction as the replication fork." [ISBN:071673706X, ISBN:0815316194]	POL32(YJR043C);RFC5(YBR087W);POL31(YJR006W);RFC4(YOL094C)
GO:0006271	5 of 34 (14.7%)	0.20	24.44	24 of 3988 (0.6%)	1.26e-06	0.00203	DNA strand elongation involved in DNA replication	"The process in which a DNA strand is synthesized from template DNA during replication by the action of polymerases, which add nucleotides to the 3' end of the nascent DNA strand." [ISBN:071673706X, ISBN:0815316194]	POL32(YJR043C);RAD27(YKL113C);RFC5(YBR087W);POL31(YJR006W);RFC4(YOL094C)
GO:0022616	5 of 34 (14.7%)	0.21	23.46	25 of 3988 (0.6%)	1.56e-06	0.00203	DNA strand elongation	"The DNA metabolic process in which a DNA strand is synthesized by adding nucleotides to the 3' end of an existing DNA stand." [GOC:isa_complete]	POL32(YJR043C);RAD27(YKL113C);RFC5(YBR087W);POL31(YJR006W);RFC4(YOL094C)
GO:0006260	8 of 34 (23.5%)	0.98	8.16	115 of 3988 (2.9%)	3.64e-06	0.00354	DNA replication	"The cellular metabolic process in which a cell duplicates one or more molecules of DNA. DNA replication begins when specific sequences, known as origins of replication, are recognized and bound by initiation proteins, and ends when the original DNA molecule has been completely duplicated and the copies topologically separated. The unit of replication usually corresponds to the genome of the cell…	POL32(YJR043C);RAD27(YKL113C);RIF2(YLR453C);ELG1(YOR144C);REV1(YOR346W);RFC5(YBR087W);POL31(YJR006W);RFC4(YOL094C)
GO:0006298	4 of 34 (11.8%)	0.14	27.60	17 of 3988 (0.4%)	9.7e-06	0.00756	mismatch repair	"A system for the correction of errors in which an incorrect base, which cannot form hydrogen bonds with the corresponding base in the parent strand, is incorporated into the daughter strand. The mismatch repair system promotes genomic fidelity by repairing base-base mismatches, insertion-deletion loops and heterologies generated during DNA replication and recombination." [ISBN:0198506732, PMID:1…	POL32(YJR043C);RFC5(YBR087W);POL31(YJR006W);RFC4(YOL094C)
GO:0043137	3 of 34 (8.8%)	0.06	50.27	7 of 3988 (0.2%)	1.94e-05	0.0126	DNA replication, removal of RNA primer	"Removal of the Okazaki RNA primer from the lagging strand of replicating DNA, by a combination of the actions of DNA polymerase, DNA helicase and an endonuclease." [GOC:jl, PMID:12424238]	POL32(YJR043C);RAD27(YKL113C);POL31(YJR006W)
GO:0006281	9 of 34 (26.5%)	1.68	5.36	197 of 3988 (4.9%)	2.61e-05	0.0145	DNA repair	"The process of restoring DNA after damage. Genomes are subject to damage by chemical and physical agents in the environment (e.g. UV and ionizing radiations, chemical mutagens, fungal and bacterial toxins, etc.) and by free radicals or alkylating agents endogenously generated in metabolism. DNA is also damaged because of errors during its replication. A variety of different DNA repair pathways h…	POL32(YJR043C);RAD27(YKL113C);RAD5(YLR032W);PSO2(YMR137C);ELG1(YOR144C);REV1(YOR346W);RFC5(YBR087W);POL31(YJR006W);RFC4(YOL094C)
GO:0006301	4 of 34 (11.8%)	0.20	20.40	23 of 3988 (0.6%)	3.48e-05	0.017	postreplication repair	"The conversion of DNA-damage induced single-stranded gaps into large molecular weight DNA after replication. Includes pathways that remove replication-blocking lesions in conjunction with DNA replication." [GOC:elh]	POL32(YJR043C);RAD5(YLR032W);REV1(YOR346W);POL31(YJR006W)
GO:0033567	3 of 34 (8.8%)	0.08	39.10	9 of 3988 (0.2%)	4.59e-05	0.0199	DNA replication, Okazaki fragment processing	"The DNA metabolic process, occurring during lagging strand synthesis, by which RNA primers are removed from Okazaki fragments, the resulting gaps filled by DNA polymerization, and the ends ligated to form a continuous strand." [GOC:mah, ISBN:0716720094]	POL32(YJR043C);RAD27(YKL113C);POL31(YJR006W)
GO:0006261	6 of 34 (17.6%)	0.71	8.48	83 of 3988 (2.1%)	5.72e-05	0.0223	DNA-dependent DNA replication	"A DNA replication process that uses parental DNA as a template for the DNA-dependent DNA polymerases that synthesize the new strands." [GOC:mah, ISBN:0198506732]	POL32(YJR043C);RAD27(YKL113C);ELG1(YOR144C);RFC5(YBR087W);POL31(YJR006W);RFC4(YOL094C)
GO:0006974	9 of 34 (26.5%)	1.95	4.61	229 of 3988 (5.7%)	8.6e-05	0.0305	response to DNA damage stimulus	"Any process that results in a change in state or activity of a cell (in terms of movement, secretion, enzyme production, gene expression, etc.) as a result of a stimulus indicating damage to its DNA from environmental insults or errors during metabolism." [GOC:go_curators]	POL32(YJR043C);RAD27(YKL113C);RAD5(YLR032W);PSO2(YMR137C);ELG1(YOR144C);REV1(YOR346W);RFC5(YBR087W);POL31(YJR006W);RFC4(YOL094C)
GO:0033554	12 of 34 (35.3%)	3.62	3.31	425 of 3988 (10.7%)	0.000113	0.0366	cellular response to stress	"Any process that results in a change in state or activity of a cell (in terms of movement, secretion, enzyme production, gene expression, etc.) as a result of a stimulus indicating the organism is under stress. The stress is usually, but not necessarily, exogenous (e.g. temperature, humidity, ionizing radiation)." [GOC:mah]	GPD1(YDL022W);SKN7(YHR206W);POL32(YJR043C);RAD27(YKL113C);RAD5(YLR032W);PSO2(YMR137C);YNL190W(YNL190W);ELG1(YOR144C);REV1(YOR346W);RFC5(YBR087W);POL31(YJR006W);RFC4(YOL094C)
GO:0006273	3 of 34 (8.8%)	0.11	27.07	13 of 3988 (0.3%)	0.000153	0.0425	lagging strand elongation	"The synthesis of DNA from a template strand in a net 3' to 5' direction. Lagging strand DNA elongation proceeds by discontinuous synthesis of short stretches of DNA, known as Okazaki fragments, from RNA primers; these fragments are then joined by DNA ligase. Although each segment of nascent DNA is synthesized in the 5' to 3' direction, the overall direction of lagging strand synthesis is 3' to 5…	POL32(YJR043C);RAD27(YKL113C);POL31(YJR006W)
GO:0006284	3 of 34 (8.8%)	0.11	27.07	13 of 3988 (0.3%)	0.000153	0.0425	base-excision repair	"In base excision repair, an altered base is removed by a DNA glycosylase enzyme, followed by excision of the resulting sugar phosphate. The small gap left in the DNA helix is filled in by the sequential action of DNA polymerase and DNA ligase." [ISBN:0815316194]	POL32(YJR043C);RAD27(YKL113C);POL31(YJR006W)
GO:0071897	3 of 34 (8.8%)	0.13	23.46	15 of 3988 (0.4%)	0.00024	0.0624	DNA biosynthetic process	"The cellular DNA metabolic process resulting in the formation of DNA, deoxyribonucleic acid, one of the two main types of nucleic acid, consisting of a long unbranched macromolecule formed from one or two strands of linked deoxyribonucleotides, the 3'-phosphate group of each constituent deoxyribonucleotide being joined in 3',5'-phosphodiester linkage to the 5'-hydroxyl group of the deoxyribose m…	RAD27(YKL113C);RAD5(YLR032W);REV1(YOR346W)
GO:0006302	5 of 34 (14.7%)	0.62	8.03	73 of 3988 (1.8%)	0.000329	0.0769	double-strand break repair	"The repair of double-strand breaks in DNA via homologous and nonhomologous mechanisms to reform a continuous DNA helix." [GOC:elh]	POL32(YJR043C);RAD27(YKL113C);RAD5(YLR032W);PSO2(YMR137C);ELG1(YOR144C)
GO:0006950	13 of 34 (38.2%)	4.71	2.76	552 of 3988 (13.8%)	0.000339	0.0769	response to stress	"Any process that results in a change in state or activity of a cell or an organism (in terms of movement, secretion, enzyme production, gene expression, etc.) as a result of a disturbance in organismal or cellular homeostasis, usually, but not necessarily, exogenous (e.g. temperature, humidity, ionizing radiation)." [GOC:mah]	PAU24(YBR301W);GPD1(YDL022W);SKN7(YHR206W);POL32(YJR043C);RAD27(YKL113C);RAD5(YLR032W);PSO2(YMR137C);YNL190W(YNL190W);ELG1(YOR144C);REV1(YOR346W);RFC5(YBR087W);POL31(YJR006W);RFC4(YOL094C)
GO:0006278	3 of 34 (8.8%)	0.14	20.70	17 of 3988 (0.4%)	0.000355	0.0769	RNA-dependent DNA replication	"A DNA replication process that uses RNA as a template for RNA-dependent DNA polymerases (e.g. reverse transcriptase) that synthesize the new strands." [GOC:mah, ISBN:0198506732]	POL32(YJR043C);RIF2(YLR453C);POL31(YJR006W)
GO:0006259	10 of 34 (29.4%)	2.92	3.42	343 of 3988 (8.6%)	0.00039	0.0799	DNA metabolic process	"Any cellular metabolic process involving deoxyribonucleic acid. This is one of the two main types of nucleic acid, consisting of a long, unbranched macromolecule formed from one, or more commonly, two, strands of linked deoxyribonucleotides." [ISBN:0198506732]	POL32(YJR043C);RAD27(YKL113C);RAD5(YLR032W);RIF2(YLR453C);PSO2(YMR137C);ELG1(YOR144C);REV1(YOR346W);RFC5(YBR087W);POL31(YJR006W);RFC4(YOL094C)
GO:0042276	2 of 34 (5.9%)	0.09	23.46	10 of 3988 (0.3%)	0.00304	0.593	error-prone translesion synthesis	"The conversion of DNA-damage induced single-stranded gaps into large molecular weight DNA after replication by using a specialized DNA polymerase or replication complex to insert a defined nucleotide across the lesion. This process does not remove the replication-blocking lesions and causes an increase in the endogenous mutation level. For example, in E. coli, a low fidelity DNA polymerase, pol …	RAD5(YLR032W);REV1(YOR346W)
GO:0065008	8 of 34 (23.5%)	2.58	3.10	303 of 3988 (7.6%)	0.0032	0.594	regulation of biological quality	"Any process that modulates a qualitative or quantitative trait of a biological quality. A biological quality is a measurable attribute of an organism or part of an organism, such as size, mass, shape, color, etc." [GOC:dph, GOC:isa_complete, GOC:mah, GOC:pr, GOC:vw]	GPD1(YDL022W);SKN7(YHR206W);MNR2(YKL064W);STE6(YKL209C);RAD5(YLR032W);RIF2(YLR453C);ELG1(YOR144C);FSF1(YOR271C)
GO:0019985	2 of 34 (5.9%)	0.10	19.55	12 of 3988 (0.3%)	0.00441	0.782	translesion synthesis	"The replication of damaged DNA by synthesis across a lesion in the template strand; a specialized DNA polymerase or replication complex inserts a defined nucleotide across from the lesion which allows DNA synthesis to continue beyond the lesion. This process can be mutagenic depending on the damaged nucleotide and the inserted nucleotide." [GOC:elh, PMID:10535901]	RAD5(YLR032W);REV1(YOR346W)
GO:0042592	6 of 34 (17.6%)	1.62	3.70	190 of 3988 (4.8%)	0.00475	0.786	homeostatic process	"Any biological process involved in the maintenance of an internal steady state." [GOC:jl, ISBN:0395825172]	GPD1(YDL022W);MNR2(YKL064W);RAD5(YLR032W);RIF2(YLR453C);ELG1(YOR144C);FSF1(YOR271C)
GO:0007062	3 of 34 (8.8%)	0.35	8.58	41 of 3988 (1.0%)	0.00484	0.786	sister chromatid cohesion	"The cell cycle process in which the sister chromatids of a replicated chromosome are joined along the entire length of the chromosome." [GOC:mah, ISBN:0815316194]	ELG1(YOR144C);RFC5(YBR087W);RFC4(YOL094C)
GO:0050896	14 of 34 (41.2%)	7.08	1.98	830 of 3988 (20.8%)	0.00542	0.832	response to stimulus	"Any process that results in a change in state or activity of a cell or an organism (in terms of movement, secretion, enzyme production, gene expression, etc.) as a result of a stimulus. The process begins with detection of the stimulus and ends with a change in state or activity or the cell or organism." [GOC:ai, GOC:bf]	PAU24(YBR301W);GPD1(YDL022W);SKN7(YHR206W);POL32(YJR043C);RAD27(YKL113C);STE6(YKL209C);RAD5(YLR032W);PSO2(YMR137C);YNL190W(YNL190W);ELG1(YOR144C);REV1(YOR346W);RFC5(YBR087W);POL31(YJR006W);RFC4(YOL094C)
GO:0051716	12 of 34 (35.3%)	5.56	2.16	652 of 3988 (16.3%)	0.00555	0.832	cellular response to stimulus	"Any process that results in a change in state or activity of a cell (in terms of movement, secretion, enzyme production, gene expression, etc.) as a result of a stimulus. The process begins with detection of the stimulus by a cell and ends with a change in state or activity or the cell." [GOC:bf, GOC:jl]	GPD1(YDL022W);SKN7(YHR206W);POL32(YJR043C);RAD27(YKL113C);RAD5(YLR032W);PSO2(YMR137C);YNL190W(YNL190W);ELG1(YOR144C);REV1(YOR346W);RFC5(YBR087W);POL31(YJR006W);RFC4(YOL094C)
GO:0006973	1 of 34 (2.9%)	0.01	117.29	1 of 3988 (0.0%)	0.00853	0.852	intracellular accumulation of glycerol	"The accumulation of glycerol within a cell, for example by increased glycerol biosynthesis combined with decreased permeability of the cell membrane to glycerol, in response to the detection of a hyperosmotic environment." [GOC:jl, PMID:11752666]	GPD1(YDL022W)
GO:0010961	1 of 34 (2.9%)	0.01	117.29	1 of 3988 (0.0%)	0.00853	0.852	cellular magnesium ion homeostasis	"Any process involved in the maintenance of an internal steady state of magnesium ions at the level of a cell." [GOC:dph, GOC:tb]	MNR2(YKL064W)
GO:0010960	1 of 34 (2.9%)	0.01	117.29	1 of 3988 (0.0%)	0.00853	0.852	magnesium ion homeostasis	"Any process involved in the maintenance of an internal steady state of magnesium ions within an organism or cell." [GOC:dph, GOC:tb]	MNR2(YKL064W)
GO:0006286	1 of 34 (2.9%)	0.01	117.29	1 of 3988 (0.0%)	0.00853	0.852	base-excision repair, base-free sugar-phosphate removal	"Excision of the sugar phosphate residue at an AP site, i.e. a deoxyribose sugar with a missing base, by a phosphodiesterase enzyme." [ISBN:0815316194]	RAD27(YKL113C)
GO:0000770	1 of 34 (2.9%)	0.01	117.29	1 of 3988 (0.0%)	0.00853	0.852	peptide pheromone export	"The directed movement of a peptide pheromone out of a cell by a secretion or export pathway used solely for the export of peptide pheromones." [GOC:elh]	STE6(YKL209C)
GO:0030072	1 of 34 (2.9%)	0.01	117.29	1 of 3988 (0.0%)	0.00853	0.852	peptide hormone secretion	"The regulated release of a peptide hormone from a cell or organ." [GOC:mah]	STE6(YKL209C)
GO:0002790	1 of 34 (2.9%)	0.01	117.29	1 of 3988 (0.0%)	0.00853	0.852	peptide secretion	"The controlled release of a peptide from a cell or group of cells." [GOC:add]	STE6(YKL209C)
GO:0046879	1 of 34 (2.9%)	0.01	117.29	1 of 3988 (0.0%)	0.00853	0.852	hormone secretion	"The regulated release of hormones, substances with a specific regulatory effect on a particular organ or group of cells." [ISBN:0198506732]	STE6(YKL209C)
GO:0009914	1 of 34 (2.9%)	0.01	117.29	1 of 3988 (0.0%)	0.00853	0.852	hormone transport	"The directed movement of hormones into, out of or within a cell, or between cells, by means of some agent such as a transporter or pore." [GOC:tb]	STE6(YKL209C)
GO:0023061	1 of 34 (2.9%)	0.01	117.29	1 of 3988 (0.0%)	0.00853	0.852	signal release	"The process in which a signal is secreted or discharged into the extracellular medium from a cellular source." [GOC:mtg_signal]	STE6(YKL209C)
GO:0010817	1 of 34 (2.9%)	0.01	117.29	1 of 3988 (0.0%)	0.00853	0.852	regulation of hormone levels	"Any process that modulates the levels of hormone within an organism or a tissue. A hormone is any substance formed in very small amounts in one specialized organ or group of cells and carried (sometimes in the bloodstream) to another organ or group of cells in the same organism, upon which it has a specific regulatory action." [GOC:BHF, GOC:dph, GOC:tb]	STE6(YKL209C)
GO:0003001	1 of 34 (2.9%)	0.01	117.29	1 of 3988 (0.0%)	0.00853	0.852	generation of a signal involved in cell-cell signaling	"The cellular process that creates a physical entity or change in state, i.e. a signal, that originates in one cell and is used to transfer information to another cell. This process begins with the initial formation of the signal and ends with the mature form and placement of the signal." [GOC:dph]	STE6(YKL209C)
GO:0007267	1 of 34 (2.9%)	0.01	117.29	1 of 3988 (0.0%)	0.00853	0.852	cell-cell signaling	"Any process that mediates the transfer of information from one cell to another." [GOC:mah]	STE6(YKL209C)
GO:0046168	1 of 34 (2.9%)	0.02	58.65	2 of 3988 (0.1%)	0.017	1	glycerol-3-phosphate catabolic process	"The chemical reactions and pathways resulting in the breakdown of glycerol-3-phosphate, a phosphoric monoester of glycerol." [GOC:ai]	GPD1(YDL022W)
GO:0034553	1 of 34 (2.9%)	0.02	58.65	2 of 3988 (0.1%)	0.017	1	mitochondrial respiratory chain complex II assembly	"The aggregation, arrangement and bonding together of a set of components to form respiratory chain complex II, in the mitochondrial inner membrane." [GOC:dgf]	YDR379C-A(YDR379C-A)
GO:0034552	1 of 34 (2.9%)	0.02	58.65	2 of 3988 (0.1%)	0.017	1	respiratory chain complex II assembly	"The aggregation, arrangement and bonding together of a set of components to form respiratory chain complex II." [GOC:dgf]	YDR379C-A(YDR379C-A)
GO:0097032	1 of 34 (2.9%)	0.02	58.65	2 of 3988 (0.1%)	0.017	1	mitochondrial respiratory chain complex II biogenesis	"The biogenesis of a mitochondrial respiratory chain complex II, a protein complex located in the mitochondrial inner membrane that forms part of the mitochondrial respiratory chain. Includes the synthesis of constituent proteins and their aggregation, arrangement and bonding together." [GOC:pr]	YDR379C-A(YDR379C-A)
GO:0000734	1 of 34 (2.9%)	0.02	58.65	2 of 3988 (0.1%)	0.017	1	gene conversion at mating-type locus, DNA repair synthesis	"Synthesis of DNA that proceeds from the broken 3' single-strand DNA end uses the homologous intact duplex as the template during gene conversion at the mating-type locus." [GOC:elh]	RAD27(YKL113C)
GO:0042631	1 of 34 (2.9%)	0.02	58.65	2 of 3988 (0.1%)	0.017	1	cellular response to water deprivation	"Any process that results in a change in state or activity of a cell (in terms of movement, secretion, enzyme production, gene expression, etc.) as a result of deprivation of water." [GOC:go_curators]	YNL190W(YNL190W)
GO:0009414	1 of 34 (2.9%)	0.02	58.65	2 of 3988 (0.1%)	0.017	1	response to water deprivation	"Any process that results in a change in state or activity of a cell or an organism (in terms of movement, secretion, enzyme production, gene expression, etc.) as a result of a water deprivation stimulus, prolonged deprivation of water." [GOC:lr]	YNL190W(YNL190W)
GO:0006072	1 of 34 (2.9%)	0.03	39.10	3 of 3988 (0.1%)	0.0254	1	glycerol-3-phosphate metabolic process	"The chemical reactions and pathways involving glycerol-3-phosphate, a phosphoric monoester of glycerol." [GOC:go_curators, ISBN:0198506732]	GPD1(YDL022W)
GO:0000304	1 of 34 (2.9%)	0.03	39.10	3 of 3988 (0.1%)	0.0254	1	response to singlet oxygen	"Any process that results in a change in state or activity of a cell or an organism (in terms of movement, secretion, enzyme production, gene expression, etc.) as a result of a singlet oxygen stimulus. Singlet oxygen is a dioxygen (O2) molecule in which two 2p electrons have similar spin. Singlet oxygen is more highly reactive than the form in which these electrons are of opposite spin, and it is…	SKN7(YHR206W)
GO:0010994	1 of 34 (2.9%)	0.03	39.10	3 of 3988 (0.1%)	0.0254	1	free ubiquitin chain polymerization	"The process of creating free ubiquitin chains, compounds composed of a large number of ubiquitin monomers. These chains are not conjugated to a protein." [GOC:BHF, GOC:dph, GOC:tb]	RAD5(YLR032W)
GO:0051436	1 of 34 (2.9%)	0.03	39.10	3 of 3988 (0.1%)	0.0254	1	negative regulation of ubiquitin-protein ligase activity involved in mitotic cell cycle	"Any process that stops, prevents, or reduces the frequency, rate or extent of ubiquitin ligase activity that contributes to the mitotic cell cycle." [GOC:ai, GOC:tb]	ACM1(YPL267W)
GO:0071214	2 of 34 (5.9%)	0.28	7.11	33 of 3988 (0.8%)	0.0316	1	cellular response to abiotic stimulus	"Any process that results in a change in state or activity of a cell (in terms of movement, secretion, enzyme production, gene expression, etc.) as a result of an abiotic (non-living) stimulus." [GOC:mah]	GPD1(YDL022W);YNL190W(YNL190W)
GO:0006401	3 of 34 (8.8%)	0.70	4.29	82 of 3988 (2.1%)	0.0317	1	RNA catabolic process	"The chemical reactions and pathways resulting in the breakdown of RNA, ribonucleic acid, one of the two main type of nucleic acid, consisting of a long, unbranched macromolecule formed from ribonucleotides joined in 3',5'-phosphodiester linkage." [ISBN:0198506732]	POL32(YJR043C);RAD27(YKL113C);POL31(YJR006W)
GO:0000731	1 of 34 (2.9%)	0.03	29.32	4 of 3988 (0.1%)	0.0337	1	DNA synthesis involved in DNA repair	"Synthesis of DNA that proceeds from the broken 3' single-strand DNA end uses the homologous intact duplex as the template." [PMID:10357855]	RAD27(YKL113C)
GO:0010993	1 of 34 (2.9%)	0.03	29.32	4 of 3988 (0.1%)	0.0337	1	regulation of ubiquitin homeostasis	"Any process that modulates the rate, frequency, or extent of ubiquitin homeostasis. Ubiquitin homeostasis is any process involved in the maintenance of an internal steady state of ubiquitin monomers and free ubiquitin chains at the level of the cell." [GOC:BHF, GOC:dph, GOC:tb]	RAD5(YLR032W)
GO:0010992	1 of 34 (2.9%)	0.03	29.32	4 of 3988 (0.1%)	0.0337	1	ubiquitin homeostasis	"Any process involved in the maintenance of an internal steady state of ubiquitin monomers and free ubiquitin chains at the level of the cell." [GOC:BHF, GOC:dph, GOC:tb]	RAD5(YLR032W)
GO:0071462	1 of 34 (2.9%)	0.03	29.32	4 of 3988 (0.1%)	0.0337	1	cellular response to water stimulus	"Any process that results in a change in state or activity of a cell (in terms of movement, secretion, enzyme production, gene expression, etc.) as a result of a stimulus reflecting the presence, absence, or concentration of water." [GOC:mah]	YNL190W(YNL190W)
GO:0009415	1 of 34 (2.9%)	0.03	29.32	4 of 3988 (0.1%)	0.0337	1	response to water stimulus	"Any process that results in a change in state or activity of a cell or an organism (in terms of movement, secretion, enzyme production, gene expression, etc.) as a result of a stimulus reflecting the presence, absence, or concentration of water." [GOC:jl]	YNL190W(YNL190W)
GO:0051444	1 of 34 (2.9%)	0.03	29.32	4 of 3988 (0.1%)	0.0337	1	negative regulation of ubiquitin-protein ligase activity	"Any process that stops, prevents, or reduces the frequency, rate or extent of ubiquitin ligase activity, the catalysis of the reaction: ATP + ubiquitin + protein lysine = AMP + diphosphate + protein N-ubiquityllysine." [EC:6.3.2.19, GOC:ai, GOC:tb]	ACM1(YPL267W)
GO:0031397	1 of 34 (2.9%)	0.03	29.32	4 of 3988 (0.1%)	0.0337	1	negative regulation of protein ubiquitination	"Any process that stops, prevents, or reduces the frequency, rate or extent of the addition of ubiquitin groups to a protein." [GOC:mah]	ACM1(YPL267W)
GO:0051352	1 of 34 (2.9%)	0.03	29.32	4 of 3988 (0.1%)	0.0337	1	negative regulation of ligase activity	"Any process that stops or reduces the rate of ligase activity, the catalysis of the ligation of two substances with concomitant breaking of a diphosphate linkage, usually in a nucleoside triphosphate." [GOC:ai]	ACM1(YPL267W)
GO:0016567	3 of 34 (8.8%)	0.74	4.04	87 of 3988 (2.2%)	0.0369	1	protein ubiquitination	"The process in which one or more ubiquitin groups are added to a protein." [GOC:ai]	DAS1(YJL149W);RAD5(YLR032W);ACM1(YPL267W)
GO:0000724	2 of 34 (5.9%)	0.32	6.34	37 of 3988 (0.9%)	0.039	1	double-strand break repair via homologous recombination	"The error-free repair of a double-strand break in DNA in which the broken DNA molecule is repaired using homologous sequences. A strand in the broken DNA searches for a homologous region in an intact chromosome to serve as the template for DNA synthesis. The restoration of two intact DNA molecules results in the exchange, reciprocal or nonreciprocal, of genetic material between the intact DNA mo…	POL32(YJR043C);ELG1(YOR144C)
GO:0006289	2 of 34 (5.9%)	0.32	6.17	38 of 3988 (1.0%)	0.041	1	nucleotide-excision repair	"A DNA repair process in which a small region of the strand surrounding the damage is removed from the DNA helix as an oligonucleotide. The small gap left in the DNA helix is filled in by the sequential action of DNA polymerase and DNA ligase. Nucleotide excision repair recognizes a wide range of substrates, including damage caused by UV irradiation (pyrimidine dimers and 6-4 photoproducts) and c…	POL32(YJR043C);POL31(YJR006W)
GO:0000160	1 of 34 (2.9%)	0.04	23.46	5 of 3988 (0.1%)	0.0419	1	phosphorelay signal transduction system	"A conserved series of molecular signals found in prokaryotes and eukaryotes; involves autophosphorylation of a histidine kinase and the transfer of the phosphate group to an aspartate that then acts as a phospho-donor to response regulator proteins." [PMID:9191038]	SKN7(YHR206W)
GO:0043619	1 of 34 (2.9%)	0.04	23.46	5 of 3988 (0.1%)	0.0419	1	regulation of transcription from RNA polymerase II promoter in response to oxidative stress	"Modulation of the frequency, rate or extent of transcription from an RNA polymerase II promoter as a result of a stimulus indicating the organism is under oxidative stress, a state often resulting from exposure to high levels of reactive oxygen species, e.g. superoxide anions, hydrogen peroxide (H2O2), and hydroxyl radicals." [GOC:jl]	SKN7(YHR206W)
GO:0051439	1 of 34 (2.9%)	0.04	23.46	5 of 3988 (0.1%)	0.0419	1	regulation of ubiquitin-protein ligase activity involved in mitotic cell cycle	"A cell cycle process that modulates the frequency, rate or extent of ubiquitin ligase activity that contributes to the mitotic cell cycle." [GOC:ai]	ACM1(YPL267W)
GO:1901700	2 of 34 (5.9%)	0.33	6.02	39 of 3988 (1.0%)	0.0429	1	response to oxygen-containing compound	"Any process that results in a change in state or activity of a cell or an organism (in terms of movement, secretion, enzyme production, gene expression, etc.) as a result of an oxygen-containing compound stimulus." [GOC:pr, GOC:TermGenie]	SKN7(YHR206W);YNL190W(YNL190W)
Depleted
GO:0010467	4 of 34 (11.8%)	9.28	0.43	1088 of 3988 (27.3%)	0.0258	1	gene expression	"The process in which a gene's sequence is converted into a mature gene product or products (proteins or RNA). This includes the production of an RNA transcript as well as any processing to produce a mature RNA product or an mRNA (for protein-coding genes) and the translation of that mRNA into protein. Some protein processing events may be included when they are required to form an active form of…	TBS1(YBR150C);SKN7(YHR206W);ACM1(YPL267W);RPC37(YKR025W)
GO:0044710	3 of 34 (8.8%)	7.57	0.40	888 of 3988 (22.3%)	0.0371	1	single-organism metabolic process	"A metabolic process - chemical reactions and pathways, including anabolism and catabolism, by which living organisms transform chemical substances - which involves a single organism." [GOC:jl]	GPD1(YDL022W);STE6(YKL209C);PLB2(YMR006C)
GO:0006396	0 of 34 (0.0%)	3.02	0.00	354 of 3988 (8.9%)	0.0418	1	RNA processing	"Any process involved in the conversion of one or more primary RNA transcripts into one or more mature RNA molecules." [GOC:mah]
GO:0019538	4 of 34 (11.8%)	8.62	0.46	1011 of 3988 (25.4%)	0.0441	1	protein metabolic process	"The chemical reactions and pathways involving a specific protein, rather than of proteins in general. Includes protein modification." [GOC:ma]	DAS1(YJL149W);RAD5(YLR032W);ACM1(YPL267W);PUP3(YER094C)
MOLECULAR_FUNCTION
GO_term	set	expected	enrichment	background	p_fisher(1side)	fdr	Name	Description
GO:0004527	4 of 34 (11.8%)	0.22	18.05	26 of 3988 (0.7%)	5.77e-05	0.109	exonuclease activity	"Catalysis of the hydrolysis of ester linkages within nucleic acids by removing nucleotide residues from the 3' or 5' end." [GOC:mah, ISBN:0198547684]	POL32(YJR043C);RAD27(YKL113C);PSO2(YMR137C);POL31(YJR006W)
GO:0003887	3 of 34 (8.8%)	0.13	23.46	15 of 3988 (0.4%)	0.00024	0.113	DNA-directed DNA polymerase activity	"Catalysis of the reaction: deoxynucleoside triphosphate + DNA(n) = diphosphate + DNA(n+1); the synthesis of DNA from deoxyribonucleotide triphosphates in the presence of a DNA template and primer." [EC:2.7.7.7, ISBN:0198547684]	POL32(YJR043C);REV1(YOR346W);POL31(YJR006W)
GO:0034061	3 of 34 (8.8%)	0.13	23.46	15 of 3988 (0.4%)	0.00024	0.113	DNA polymerase activity	"Catalysis of the reaction: deoxynucleoside triphosphate + DNA(n) = diphosphate + DNA(n+1); the synthesis of DNA from deoxyribonucleotide triphosphates in the presence of a nucleic acid template and primer." [EC:2.7.7.7, GOC:mah]	POL32(YJR043C);REV1(YOR346W);POL31(YJR006W)
GO:0008310	2 of 34 (5.9%)	0.03	58.65	4 of 3988 (0.1%)	0.000419	0.113	single-stranded DNA specific 3'-5' exodeoxyribonuclease activity	"Catalysis of the sequential cleavage of mononucleotides from a free 3' terminus of a single-stranded DNA molecule." [GOC:mah]	POL32(YJR043C);POL31(YJR006W)
GO:0008297	2 of 34 (5.9%)	0.03	58.65	4 of 3988 (0.1%)	0.000419	0.113	single-stranded DNA specific exodeoxyribonuclease activity	"Catalysis of the sequential cleavage of mononucleotides from a free 5' or 3' terminus of a single-stranded DNA molecule." [GOC:mah]	POL32(YJR043C);POL31(YJR006W)
GO:0003689	2 of 34 (5.9%)	0.03	58.65	4 of 3988 (0.1%)	0.000419	0.113	DNA clamp loader activity	"Catalysis of the reaction: ATP + H2O = ADP + phosphate, to drive the opening of the ring structure of the PCNA complex, or any of the related sliding clamp complexes, and their closing around the DNA duplex." [GOC:mah, GOC:vw, PMID:16082778]	RFC5(YBR087W);RFC4(YOL094C)
GO:0033170	2 of 34 (5.9%)	0.03	58.65	4 of 3988 (0.1%)	0.000419	0.113	protein-DNA loading ATPase activity	"Catalysis of the reaction: ATP + H2O = ADP + phosphate, to drive the assembly of a protein or protein complex onto a DNA molecule." [GOC:mah, GOC:vw]	RFC5(YBR087W);RFC4(YOL094C)
GO:0008409	2 of 34 (5.9%)	0.04	46.92	5 of 3988 (0.1%)	0.000694	0.161	5'-3' exonuclease activity	"Catalysis of the hydrolysis of ester linkages within nucleic acids by removing nucleotide residues from the 5' end." [GOC:ai]	RAD27(YKL113C);PSO2(YMR137C)
GO:0016779	4 of 34 (11.8%)	0.43	9.38	50 of 3988 (1.3%)	0.000769	0.161	nucleotidyltransferase activity	"Catalysis of the transfer of a nucleotidyl group to a reactant." [ISBN:0198506732]	POL32(YJR043C);REV1(YOR346W);POL31(YJR006W);RPC37(YKR025W)
GO:0003677	10 of 34 (29.4%)	3.23	3.09	379 of 3988 (9.5%)	0.000867	0.163	DNA binding	"Any molecular function by which a gene product interacts selectively and non-covalently with DNA (deoxyribonucleic acid)." [GOC:dph, GOC:jl, GOC:tb, GOC:vw]	TBS1(YBR150C);SKN7(YHR206W);RAD27(YKL113C);RAD5(YLR032W);RIF2(YLR453C);PSO2(YMR137C);REV1(YOR346W);RFC5(YBR087W);POL31(YJR006W);RFC4(YOL094C)
GO:0008296	2 of 34 (5.9%)	0.05	39.10	6 of 3988 (0.2%)	0.00104	0.177	3'-5'-exodeoxyribonuclease activity	"Catalysis of the sequential cleavage of mononucleotides from a free 3' terminus of a DNA molecule." [GOC:mah]	POL32(YJR043C);POL31(YJR006W)
GO:0004536	3 of 34 (8.8%)	0.22	13.53	26 of 3988 (0.7%)	0.00129	0.202	deoxyribonuclease activity	"Catalysis of the hydrolysis of ester linkages within deoxyribonucleic acid." [GOC:mah, ISBN:0198547684]	POL32(YJR043C);RAD27(YKL113C);POL31(YJR006W)
GO:0016895	2 of 34 (5.9%)	0.06	33.51	7 of 3988 (0.2%)	0.00144	0.209	exodeoxyribonuclease activity, producing 5'-phosphomonoesters	"Catalysis of the hydrolysis of ester linkages within deoxyribonucleic acids by removing nucleotide residues from the 3' or 5' end to yield 5' phosphomonoesters." [GOC:ai]	POL32(YJR043C);POL31(YJR006W)
GO:0004529	2 of 34 (5.9%)	0.07	29.32	8 of 3988 (0.2%)	0.00191	0.257	exodeoxyribonuclease activity	"Catalysis of the sequential cleavage of mononucleotides from a free 5' or 3' terminus of a DNA molecule." [GOC:mah, ISBN:0198547684]	POL32(YJR043C);POL31(YJR006W)
GO:0004518	4 of 34 (11.8%)	0.59	6.80	69 of 3988 (1.7%)	0.00257	0.323	nuclease activity	"Catalysis of the hydrolysis of ester linkages within nucleic acids." [ISBN:0198547684]	POL32(YJR043C);RAD27(YKL113C);PSO2(YMR137C);POL31(YJR006W)
GO:0008094	3 of 34 (8.8%)	0.39	7.65	46 of 3988 (1.2%)	0.00669	0.729	DNA-dependent ATPase activity	"Catalysis of the reaction: ATP + H2O = ADP + phosphate; this reaction requires the presence of single- or double-stranded DNA, and it drives another reaction." [EC:3.6.1.3, GOC:jl]	RAD5(YLR032W);RFC5(YBR087W);RFC4(YOL094C)
GO:0008408	2 of 34 (5.9%)	0.14	14.66	16 of 3988 (0.4%)	0.00786	0.729	3'-5' exonuclease activity	"Catalysis of the hydrolysis of ester linkages within nucleic acids by removing nucleotide residues from the 3' end." [GOC:ai]	POL32(YJR043C);POL31(YJR006W)
GO:0016796	2 of 34 (5.9%)	0.14	14.66	16 of 3988 (0.4%)	0.00786	0.729	exonuclease activity, active with either ribo- or deoxyribonucleic acids and producing 5'-phosphomonoesters	"Catalysis of the hydrolysis of ester linkages within nucleic acids by removing nucleotide residues from the 3' or 5' end to yield 5' phosphomonoesters." [GOC:mah]	POL32(YJR043C);POL31(YJR006W)
GO:0017125	1 of 34 (2.9%)	0.01	117.29	1 of 3988 (0.0%)	0.00853	0.729	deoxycytidyl transferase activity	"Catalysis of the insertion of a dCMP residue opposite a template abasic site in DNA." [PMID:10535901]	REV1(YOR346W)
GO:0055105	1 of 34 (2.9%)	0.01	117.29	1 of 3988 (0.0%)	0.00853	0.729	ubiquitin-protein ligase inhibitor activity	"Stops, prevents or reduces the activity of a ubiquitin-protein ligase." [GOC:BHF, GOC:rl]	ACM1(YPL267W)
GO:0055104	1 of 34 (2.9%)	0.01	117.29	1 of 3988 (0.0%)	0.00853	0.729	ligase inhibitor activity	"Stops, prevents or reduces the activity of a ligase." [GOC:BHF, GOC:rl]	ACM1(YPL267W)
GO:0061133	1 of 34 (2.9%)	0.01	117.29	1 of 3988 (0.0%)	0.00853	0.729	endopeptidase activator activity	"Increases the activity of an endopeptidase, any enzyme that hydrolyzes nonterminal peptide bonds in polypeptides." [GOC:dph, GOC:tb]	PUP3(YER094C)
GO:0003684	2 of 34 (5.9%)	0.19	10.66	22 of 3988 (0.6%)	0.0146	1	damaged DNA binding	"Interacting selectively and non-covalently with damaged DNA." [GOC:jl]	PSO2(YMR137C);REV1(YOR346W)
GO:0004367	1 of 34 (2.9%)	0.02	58.65	2 of 3988 (0.1%)	0.017	1	glycerol-3-phosphate dehydrogenase [NAD+] activity	"Catalysis of the reaction: sn-glycerol 3-phosphate + NAD+ = glycerone phosphate + NADH + H+." [EC:1.1.1.8]	GPD1(YDL022W)
GO:0004622	1 of 34 (2.9%)	0.02	58.65	2 of 3988 (0.1%)	0.017	1	lysophospholipase activity	"Catalysis of the reaction: 2-lysophosphatidylcholine + H2O = glycerophosphocholine + a carboxylate." [EC:3.1.1.5]	PLB2(YMR006C)
GO:0016504	1 of 34 (2.9%)	0.02	58.65	2 of 3988 (0.1%)	0.017	1	peptidase activator activity	"Increases the activity of a peptidase, any enzyme that catalyzes the hydrolysis peptide bonds." [GOC:ai]	PUP3(YER094C)
GO:0042623	4 of 34 (11.8%)	1.10	3.64	129 of 3988 (3.2%)	0.0229	1	ATPase activity, coupled	"Catalysis of the reaction: ATP + H2O = ADP + phosphate; this reaction directly drives some other reaction, for example ion transport across a membrane." [EC:3.6.1.3, GOC:jl]	STE6(YKL209C);RAD5(YLR032W);RFC5(YBR087W);RFC4(YOL094C)
GO:0003676	11 of 34 (32.4%)	5.92	1.86	694 of 3988 (17.4%)	0.0246	1	nucleic acid binding	"Interacting selectively and non-covalently with any nucleic acid." [GOC:jl]	TBS1(YBR150C);YGR001C(YGR001C);SKN7(YHR206W);RAD27(YKL113C);RAD5(YLR032W);RIF2(YLR453C);PSO2(YMR137C);REV1(YOR346W);RFC5(YBR087W);POL31(YJR006W);RFC4(YOL094C)
GO:0015095	1 of 34 (2.9%)	0.03	39.10	3 of 3988 (0.1%)	0.0254	1	magnesium ion transmembrane transporter activity	"Catalysis of the transfer of magnesium (Mg) ions from one side of a membrane to the other." [GOC:dgf]	MNR2(YKL064W)
GO:0015440	1 of 34 (2.9%)	0.03	39.10	3 of 3988 (0.1%)	0.0254	1	peptide-transporting ATPase activity	"Catalysis of the reaction: ATP + H2O + peptide(in) = ADP + phosphate + peptide(out). Peptides exported include alpha-hemolysin, cyclolysin, colicin V and siderophores from Gram-negative bacteria, and bacteriocin, subtilin, competence factor and pediocin from Gram-positive bacteria." [EC:3.6.3.43]	STE6(YKL209C)
GO:0009378	1 of 34 (2.9%)	0.03	39.10	3 of 3988 (0.1%)	0.0254	1	four-way junction helicase activity	"Catalysis of the unwinding of the DNA helix of DNA containing four-way junctions, including Holliday junctions." [GOC:jl, PMID:9442895]	RAD5(YLR032W)
GO:0000403	1 of 34 (2.9%)	0.03	39.10	3 of 3988 (0.1%)	0.0254	1	Y-form DNA binding	"Interacting selectively and non-covalently with segment of DNA shaped like a Y. This shape occurs when DNA contains a region of paired double-stranded DNA on one end and a region of unpaired DNA strands on the opposite end." [GOC:elh, PMID:16781730]	RAD5(YLR032W)
GO:0016788	5 of 34 (14.7%)	1.76	2.83	207 of 3988 (5.2%)	0.0292	1	hydrolase activity, acting on ester bonds	"Catalysis of the hydrolysis of any ester bond." [GOC:jl]	POL32(YJR043C);RAD27(YKL113C);PLB2(YMR006C);PSO2(YMR137C);POL31(YJR006W)
GO:0000156	1 of 34 (2.9%)	0.03	29.32	4 of 3988 (0.1%)	0.0337	1	phosphorelay response regulator activity	"Responds to a phosphorelay sensor to initiate a change in cell state or activity. The activity of the response regulator is regulated by transfer of a phosphate from a histidine residue in the sensor, to an aspartate residue in the response regulator. Many but not all response regulators act as transcriptional regulators to elicit a response." [GOC:bf, PMID:10966457, PMID:11842140]	SKN7(YHR206W)
GO:0055106	1 of 34 (2.9%)	0.03	29.32	4 of 3988 (0.1%)	0.0337	1	ubiquitin-protein ligase regulator activity	"Modulates the activity of a ubiquitin-protein ligase, an enzyme that catalyzes the covalent attachment of ubiquitin to lysine in a substrate protein." [GOC:BHF, GOC:rl]	ACM1(YPL267W)
GO:0055103	1 of 34 (2.9%)	0.03	29.32	4 of 3988 (0.1%)	0.0337	1	ligase regulator activity	"Modulates the activity of a ligase." [GOC:BHF, GOC:rl]	ACM1(YPL267W)
GO:0061135	1 of 34 (2.9%)	0.03	29.32	4 of 3988 (0.1%)	0.0337	1	endopeptidase regulator activity	"Modulates the activity of a peptidase, any enzyme that hydrolyzes nonterminal peptide bonds in polypeptides." [GOC:dph, GOC:tb]	PUP3(YER094C)
GO:0016787	10 of 34 (29.4%)	5.57	1.80	653 of 3988 (16.4%)	0.0406	1	hydrolase activity	"Catalysis of the hydrolysis of various bonds, e.g. C-O, C-N, C-C, phosphoric anhydride bonds, etc. Hydrolase is the systematic name for any enzyme of EC class 3." [ISBN:0198506732]	POL32(YJR043C);RAD27(YKL113C);STE6(YKL209C);RAD5(YLR032W);PLB2(YMR006C);PSO2(YMR137C);RFC5(YBR087W);PUP3(YER094C);POL31(YJR006W);RFC4(YOL094C)
GO:0017108	1 of 34 (2.9%)	0.04	23.46	5 of 3988 (0.1%)	0.0419	1	5'-flap endonuclease activity	"Catalysis of the cleavage of a 5' flap structure in DNA, but not other DNA structures; processes the 5' ends of Okazaki fragments in lagging strand DNA synthesis." [PMID:9778254]	RAD27(YKL113C)
GO:0048256	1 of 34 (2.9%)	0.04	23.46	5 of 3988 (0.1%)	0.0419	1	flap endonuclease activity	"Catalysis of the cleavage of a flap structure in DNA, but not other DNA structures; processes the ends of Okazaki fragments in lagging strand DNA synthesis." [GOC:jid]	RAD27(YKL113C)
GO:0032934	1 of 34 (2.9%)	0.04	23.46	5 of 3988 (0.1%)	0.0419	1	sterol binding	"Interacting selectively and non-covalently with a sterol, any steroid containing a hydroxy group in the 3 position, closely related to cholestan-3-ol." [CHEBI:15889, GOC:mah]	PRY2(YKR013W)
GO:0005496	1 of 34 (2.9%)	0.04	23.46	5 of 3988 (0.1%)	0.0419	1	steroid binding	"Interacting selectively and non-covalently with a steroid, any of a large group of substances that have in common a ring system based on 1,2-cyclopentanoperhydrophenanthrene." [GOC:jl, ISBN:0198506732]	PRY2(YKR013W)
GO:0000400	1 of 34 (2.9%)	0.04	23.46	5 of 3988 (0.1%)	0.0419	1	four-way junction DNA binding	"Interacting selectively and non-covalently with DNA containing four-way junctions, also known as Holliday junctions, a structure where two DNA double strands are held together by reciprocal exchange of two of the four strands, one strand each from the two original helices." [GOC:krc, ISBN:0815332181, PMID:15563464]	RAD5(YLR032W)
GO:0004620	1 of 34 (2.9%)	0.04	23.46	5 of 3988 (0.1%)	0.0419	1	phospholipase activity	"Catalysis of the hydrolysis of a glycerophospholipid." [ISBN:0198506732]	PLB2(YMR006C)
GO:0061134	1 of 34 (2.9%)	0.04	23.46	5 of 3988 (0.1%)	0.0419	1	peptidase regulator activity	"Modulates the activity of a peptidase, any enzyme that catalyzes the hydrolysis peptide bonds." [GOC:dph, GOC:tb]	PUP3(YER094C)
CELLULAR_COMPONENT
GO_term	set	expected	enrichment	background	p_fisher(1side)	fdr	Name	Description
GO:0031391	3 of 34 (8.8%)	0.03	87.97	4 of 3988 (0.1%)	2.25e-06	0.00177	Elg1 RFC-like complex	"A pentameric complex related to replication factor C, which loads the DNA polymerase processivity factor proliferating cell nuclear antigen (PCNA) onto DNA and has roles in telomere length regulation and other aspects of genome stability. In Saccharomyces the subunits are known as Elg1p, Rfc2p, Rfc3p, Rfc4p, and Rfc5p." [PMID:14614842]	ELG1(YOR144C);RFC5(YBR087W);RFC4(YOL094C)
GO:0005657	5 of 34 (14.7%)	0.35	14.30	41 of 3988 (1.0%)	2e-05	0.00783	replication fork	"The Y-shaped region of a replicating DNA molecule, resulting from the separation of the DNA strands and in which the synthesis of new strands takes place. Also includes associated protein complexes." [GOC:mah, ISBN:0198547684]	POL32(YJR043C);REV1(YOR346W);RFC5(YBR087W);POL31(YJR006W);RFC4(YOL094C)
GO:0043625	2 of 34 (5.9%)	0.03	78.20	3 of 3988 (0.1%)	0.000211	0.0349	delta DNA polymerase complex	"A multimeric DNA polymerase enzyme complex which differs in composition amongst species; in humans it is a heterotetramer of four subunits of approximately 125, 50, 68 and 12kDa, while in S. cerevisiae, it has three different subunits which form a heterotrimer, and the active enzyme is a dimer of this heterotrimer. Functions in DNA replication, mismatch repair and excision repair." [GOC:jl, ISBN…	POL32(YJR043C);POL31(YJR006W)
GO:0005663	2 of 34 (5.9%)	0.03	78.20	3 of 3988 (0.1%)	0.000211	0.0349	DNA replication factor C complex	"A complex of five polypeptides in eukaryotes, and two in prokaryotes, that loads the DNA polymerase processivity factor proliferating cell nuclear antigen (PCNA) onto DNA, thereby permitting processive DNA synthesis catalyzed by DNA polymerase." [PMID:14614842, PMID:14646196, PMID:16172520]	RFC5(YBR087W);RFC4(YOL094C)
GO:0044427	9 of 34 (26.5%)	2.21	4.08	259 of 3988 (6.5%)	0.000222	0.0349	chromosomal part	"Any constituent part of a chromosome, a structure composed of a very long molecule of DNA and associated proteins (e.g. histones) that carries hereditary information." [GOC:jl]	LIN1(YHR156C);POL32(YJR043C);RAD5(YLR032W);RIF2(YLR453C);ELG1(YOR144C);REV1(YOR346W);RFC5(YBR087W);POL31(YJR006W);RFC4(YOL094C)
GO:0031389	2 of 34 (5.9%)	0.03	58.65	4 of 3988 (0.1%)	0.000419	0.0498	Rad17 RFC-like complex	"A pentameric protein complex related to replication factor C, which loads a trimeric complex of checkpoint proteins (known as the checkpoint clamp or 9-1-1 complex) onto DNA at damage sites; functions in DNA damage cell cycle checkpoints. In Schizosaccharomyces pombe the subunits are known as Rad17, Rfc2, Rfc3, Rfc4, and Rfc5, while in Saccharomyces cerevisiae the subunits are known as Rad24p, R…	RFC5(YBR087W);RFC4(YOL094C)
GO:0005694	9 of 34 (26.5%)	2.42	3.72	284 of 3988 (7.1%)	0.000445	0.0498	chromosome	"A structure composed of a very long molecule of DNA and associated proteins (e.g. histones) that carries hereditary information." [ISBN:0198547684]	LIN1(YHR156C);POL32(YJR043C);RAD5(YLR032W);RIF2(YLR453C);ELG1(YOR144C);REV1(YOR346W);RFC5(YBR087W);POL31(YJR006W);RFC4(YOL094C)
GO:0031390	2 of 34 (5.9%)	0.05	39.10	6 of 3988 (0.2%)	0.00104	0.102	Ctf18 RFC-like complex	"A heptameric complex related to replication factor C, which loads the DNA polymerase processivity factor proliferating cell nuclear antigen (PCNA) onto DNA and plays a vital role in chromosome cohesion. In Saccharomyces the subunits are known as Ctf18p, Rfc2p, Rfc3p, Rfc4p, Rfc5p, Dcc1p, and Ctf8p." [PMID:14614842]	RFC5(YBR087W);RFC4(YOL094C)
GO:0042575	2 of 34 (5.9%)	0.07	29.32	8 of 3988 (0.2%)	0.00191	0.167	DNA polymerase complex	"A protein complex that possesses DNA polymerase activity and is involved in template directed synthesis of DNA." [GOC:jl, PMID:12045093]	POL32(YJR043C);POL31(YJR006W)
GO:0032993	3 of 34 (8.8%)	0.38	8.00	44 of 3988 (1.1%)	0.00591	0.393	protein-DNA complex	"A macromolecular complex containing both protein and DNA molecules." [GOC:mah]	POL32(YJR043C);RIF2(YLR453C);POL31(YJR006W)
GO:0043601	2 of 34 (5.9%)	0.12	16.76	14 of 3988 (0.4%)	0.00602	0.393	nuclear replisome	"A multi-component enzymatic machine at the nuclear replication fork, which mediates DNA replication. Includes DNA primase, one or more DNA polymerases, DNA helicases, and other proteins." [GOC:jl, GOC:mtg_sensu]	POL32(YJR043C);POL31(YJR006W)
GO:0030894	2 of 34 (5.9%)	0.12	16.76	14 of 3988 (0.4%)	0.00602	0.393	replisome	"A multi-component enzymatic machine at the replication fork which mediates DNA replication. Includes DNA primase, one or more DNA polymerases, DNA helicases, and other proteins." [GOC:mah, GOC:vw]	POL32(YJR043C);POL31(YJR006W)
GO:0005576	3 of 34 (8.8%)	0.52	5.77	61 of 3988 (1.5%)	0.0145	0.877	extracellular region	"The space external to the outermost structure of a cell. For cells without external protective or external encapsulating structures this refers to space outside of the plasma membrane. This term covers the host cell environment outside an intracellular parasite." [GOC:go_curators]	PAU24(YBR301W);PRY2(YKR013W);PLB2(YMR006C)
GO:0009277	3 of 34 (8.8%)	0.54	5.59	63 of 3988 (1.6%)	0.0159	0.881	fungal-type cell wall	"A rigid yet dynamic structure surrounding the plasma membrane that affords protection from stresses and contributes to cell morphogenesis, consisting of extensively cross-linked glycoproteins and carbohydrates. The glycoproteins may be modified with N- or O-linked carbohydrates, or glycosylphosphatidylinositol (GPI) anchors; the polysaccharides are primarily branched glucans, including beta-link…	PAU24(YBR301W);PLB2(YMR006C);YNL190W(YNL190W)
GO:0005618	3 of 34 (8.8%)	0.56	5.33	66 of 3988 (1.7%)	0.018	0.881	cell wall	"The rigid or semi-rigid envelope lying outside the cell membrane of plant, fungal, and most prokaryotic cells, maintaining their shape and protecting them from osmotic lysis. In plants it is made of cellulose and, often, lignin; in fungi it is composed largely of polysaccharides; in bacteria it is composed of peptidoglycan." [ISBN:0198547684]	PAU24(YBR301W);PLB2(YMR006C);YNL190W(YNL190W)
GO:0030312	3 of 34 (8.8%)	0.56	5.33	66 of 3988 (1.7%)	0.018	0.881	external encapsulating structure	"A structure that lies outside the plasma membrane and surrounds the entire cell." [GOC:go_curators]	PAU24(YBR301W);PLB2(YMR006C);YNL190W(YNL190W)
GO:0044454	5 of 34 (14.7%)	1.70	2.95	199 of 3988 (5.0%)	0.0251	1	nuclear chromosome part	"Any constituent part of a nuclear chromosome, a chromosome found in the nucleus of a eukaryotic cell." [GOC:jl]	POL32(YJR043C);RAD5(YLR032W);RIF2(YLR453C);REV1(YOR346W);POL31(YJR006W)
GO:0009331	1 of 34 (2.9%)	0.03	39.10	3 of 3988 (0.1%)	0.0254	1	glycerol-3-phosphate dehydrogenase complex	"An enzyme complex that catalyzes the dehydrogenation of sn-glycerol 3-phosphate to form glycerone phosphate." [EC:1.1.5.3]	GPD1(YDL022W)
GO:0000781	2 of 34 (5.9%)	0.28	7.11	33 of 3988 (0.8%)	0.0316	1	chromosome, telomeric region	"The terminal region of a linear chromosome that includes the telomeric DNA repeats and associated proteins." [GOC:elh]	RIF2(YLR453C);ELG1(YOR144C)
GO:0019774	1 of 34 (2.9%)	0.03	29.32	4 of 3988 (0.1%)	0.0337	1	proteasome core complex, beta-subunit complex	"The proteasome core subcomplex that constitutes the two inner rings of the proteasome core complex. An example of this component is found in Mus musculus." [GOC:jl, GOC:mtg_sensu, GOC:rb, PMID:10854779]	PUP3(YER094C)
GO:0043596	2 of 34 (5.9%)	0.30	6.70	35 of 3988 (0.9%)	0.0352	1	nuclear replication fork	"The Y-shaped region of a nuclear replicating DNA molecule, resulting from the separation of the DNA strands and in which the synthesis of new strands takes place. Also includes associated protein complexes." [GOC:jl, GOC:mtg_sensu]	POL32(YJR043C);POL31(YJR006W)
GO:0000228	5 of 34 (14.7%)	1.87	2.68	219 of 3988 (5.5%)	0.0361	1	nuclear chromosome	"A chromosome found in the nucleus of a eukaryotic cell." [GOC:mah]	POL32(YJR043C);RAD5(YLR032W);RIF2(YLR453C);REV1(YOR346W);POL31(YJR006W)
GO:0005634	18 of 34 (52.9%)	12.78	1.41	1499 of 3988 (37.6%)	0.0484	1	nucleus	"A membrane-bounded organelle of eukaryotic cells in which chromosomes are housed and replicated. In most cells, the nucleus contains all of the cell's chromosomes except the organellar chromosomes, and is the site of RNA synthesis and processing. In some species, or in specialized cell types, RNA metabolism or DNA replication may be absent." [GOC:go_curators]	TBS1(YBR150C);GPD1(YDL022W);LIN1(YHR156C);SKN7(YHR206W);POL32(YJR043C);RAD27(YKL113C);RAD5(YLR032W);RIF2(YLR453C);YML108W(YML108W);PSO2(YMR137C);ELG1(YOR144C);REV1(YOR346W);ACM1(YPL267W);RFC5(YBR087W);PUP3(YER094C);POL31(YJR006W);RPC37(YKR025W);RFC4(YOL094C)

## Sheet: Randomization 5
BIOLOGICAL_PROCESS
GO_term	set	expected	enrichment	background	p_fisher(1side)	fdr	Name	Description
GO:0006272	4 of 35 (11.4%)	0.08	50.64	9 of 3988 (0.2%)	6.08e-07	0.00236	leading strand elongation	"The synthesis of DNA from a template strand in the 5' to 3' direction; leading strand elongation is continuous as it proceeds in the same direction as the replication fork." [ISBN:071673706X, ISBN:0815316194]	POL32(YJR043C);RFC5(YBR087W);POL31(YJR006W);RFC4(YOL094C)
GO:0006271	5 of 35 (14.3%)	0.21	23.74	24 of 3988 (0.6%)	1.46e-06	0.00236	DNA strand elongation involved in DNA replication	"The process in which a DNA strand is synthesized from template DNA during replication by the action of polymerases, which add nucleotides to the 3' end of the nascent DNA strand." [ISBN:071673706X, ISBN:0815316194]	POL32(YJR043C);RAD27(YKL113C);RFC5(YBR087W);POL31(YJR006W);RFC4(YOL094C)
GO:0022616	5 of 35 (14.3%)	0.22	22.79	25 of 3988 (0.6%)	1.81e-06	0.00236	DNA strand elongation	"The DNA metabolic process in which a DNA strand is synthesized by adding nucleotides to the 3' end of an existing DNA stand." [GOC:isa_complete]	POL32(YJR043C);RAD27(YKL113C);RFC5(YBR087W);POL31(YJR006W);RFC4(YOL094C)
GO:0006260	8 of 35 (22.9%)	1.01	7.93	115 of 3988 (2.9%)	4.6e-06	0.00448	DNA replication	"The cellular metabolic process in which a cell duplicates one or more molecules of DNA. DNA replication begins when specific sequences, known as origins of replication, are recognized and bound by initiation proteins, and ends when the original DNA molecule has been completely duplicated and the copies topologically separated. The unit of replication usually corresponds to the genome of the cell…	POL32(YJR043C);RAD27(YKL113C);RIF2(YLR453C);ELG1(YOR144C);REV1(YOR346W);RFC5(YBR087W);POL31(YJR006W);RFC4(YOL094C)
GO:0006298	4 of 35 (11.4%)	0.15	26.81	17 of 3988 (0.4%)	1.09e-05	0.00851	mismatch repair	"A system for the correction of errors in which an incorrect base, which cannot form hydrogen bonds with the corresponding base in the parent strand, is incorporated into the daughter strand. The mismatch repair system promotes genomic fidelity by repairing base-base mismatches, insertion-deletion loops and heterologies generated during DNA replication and recombination." [ISBN:0198506732, PMID:1…	POL32(YJR043C);RFC5(YBR087W);POL31(YJR006W);RFC4(YOL094C)
GO:0043137	3 of 35 (8.6%)	0.06	48.83	7 of 3988 (0.2%)	2.12e-05	0.0138	DNA replication, removal of RNA primer	"Removal of the Okazaki RNA primer from the lagging strand of replicating DNA, by a combination of the actions of DNA polymerase, DNA helicase and an endonuclease." [GOC:jl, PMID:12424238]	POL32(YJR043C);RAD27(YKL113C);POL31(YJR006W)
GO:0006281	9 of 35 (25.7%)	1.73	5.21	197 of 3988 (4.9%)	3.36e-05	0.0187	DNA repair	"The process of restoring DNA after damage. Genomes are subject to damage by chemical and physical agents in the environment (e.g. UV and ionizing radiations, chemical mutagens, fungal and bacterial toxins, etc.) and by free radicals or alkylating agents endogenously generated in metabolism. DNA is also damaged because of errors during its replication. A variety of different DNA repair pathways h…	POL32(YJR043C);RAD27(YKL113C);RAD5(YLR032W);PSO2(YMR137C);ELG1(YOR144C);REV1(YOR346W);RFC5(YBR087W);POL31(YJR006W);RFC4(YOL094C)
GO:0006301	4 of 35 (11.4%)	0.20	19.82	23 of 3988 (0.6%)	3.91e-05	0.0191	postreplication repair	"The conversion of DNA-damage induced single-stranded gaps into large molecular weight DNA after replication. Includes pathways that remove replication-blocking lesions in conjunction with DNA replication." [GOC:elh]	POL32(YJR043C);RAD5(YLR032W);REV1(YOR346W);POL31(YJR006W)
GO:0033567	3 of 35 (8.6%)	0.08	37.98	9 of 3988 (0.2%)	5.02e-05	0.0217	DNA replication, Okazaki fragment processing	"The DNA metabolic process, occurring during lagging strand synthesis, by which RNA primers are removed from Okazaki fragments, the resulting gaps filled by DNA polymerization, and the ends ligated to form a continuous strand." [GOC:mah, ISBN:0716720094]	POL32(YJR043C);RAD27(YKL113C);POL31(YJR006W)
GO:0006261	6 of 35 (17.1%)	0.73	8.24	83 of 3988 (2.1%)	6.79e-05	0.0265	DNA-dependent DNA replication	"A DNA replication process that uses parental DNA as a template for the DNA-dependent DNA polymerases that synthesize the new strands." [GOC:mah, ISBN:0198506732]	POL32(YJR043C);RAD27(YKL113C);ELG1(YOR144C);RFC5(YBR087W);POL31(YJR006W);RFC4(YOL094C)
GO:0006974	9 of 35 (25.7%)	2.01	4.48	229 of 3988 (5.7%)	0.00011	0.039	response to DNA damage stimulus	"Any process that results in a change in state or activity of a cell (in terms of movement, secretion, enzyme production, gene expression, etc.) as a result of a stimulus indicating damage to its DNA from environmental insults or errors during metabolism." [GOC:go_curators]	POL32(YJR043C);RAD27(YKL113C);RAD5(YLR032W);PSO2(YMR137C);ELG1(YOR144C);REV1(YOR346W);RFC5(YBR087W);POL31(YJR006W);RFC4(YOL094C)
GO:0033554	12 of 35 (34.3%)	3.73	3.22	425 of 3988 (10.7%)	0.000155	0.0465	cellular response to stress	"Any process that results in a change in state or activity of a cell (in terms of movement, secretion, enzyme production, gene expression, etc.) as a result of a stimulus indicating the organism is under stress. The stress is usually, but not necessarily, exogenous (e.g. temperature, humidity, ionizing radiation)." [GOC:mah]	GPD1(YDL022W);SKN7(YHR206W);POL32(YJR043C);RAD27(YKL113C);RAD5(YLR032W);PSO2(YMR137C);YNL190W(YNL190W);ELG1(YOR144C);REV1(YOR346W);RFC5(YBR087W);POL31(YJR006W);RFC4(YOL094C)
GO:0006273	3 of 35 (8.6%)	0.11	26.29	13 of 3988 (0.3%)	0.000167	0.0465	lagging strand elongation	"The synthesis of DNA from a template strand in a net 3' to 5' direction. Lagging strand DNA elongation proceeds by discontinuous synthesis of short stretches of DNA, known as Okazaki fragments, from RNA primers; these fragments are then joined by DNA ligase. Although each segment of nascent DNA is synthesized in the 5' to 3' direction, the overall direction of lagging strand synthesis is 3' to 5…	POL32(YJR043C);RAD27(YKL113C);POL31(YJR006W)
GO:0006284	3 of 35 (8.6%)	0.11	26.29	13 of 3988 (0.3%)	0.000167	0.0465	base-excision repair	"In base excision repair, an altered base is removed by a DNA glycosylase enzyme, followed by excision of the resulting sugar phosphate. The small gap left in the DNA helix is filled in by the sequential action of DNA polymerase and DNA ligase." [ISBN:0815316194]	POL32(YJR043C);RAD27(YKL113C);POL31(YJR006W)
GO:0071897	3 of 35 (8.6%)	0.13	22.79	15 of 3988 (0.4%)	0.000262	0.0681	DNA biosynthetic process	"The cellular DNA metabolic process resulting in the formation of DNA, deoxyribonucleic acid, one of the two main types of nucleic acid, consisting of a long unbranched macromolecule formed from one or two strands of linked deoxyribonucleotides, the 3'-phosphate group of each constituent deoxyribonucleotide being joined in 3',5'-phosphodiester linkage to the 5'-hydroxyl group of the deoxyribose m…	RAD27(YKL113C);RAD5(YLR032W);REV1(YOR346W)
GO:0006302	5 of 35 (14.3%)	0.64	7.80	73 of 3988 (1.8%)	0.000379	0.0888	double-strand break repair	"The repair of double-strand breaks in DNA via homologous and nonhomologous mechanisms to reform a continuous DNA helix." [GOC:elh]	POL32(YJR043C);RAD27(YKL113C);RAD5(YLR032W);PSO2(YMR137C);ELG1(YOR144C)
GO:0006278	3 of 35 (8.6%)	0.15	20.11	17 of 3988 (0.4%)	0.000387	0.0888	RNA-dependent DNA replication	"A DNA replication process that uses RNA as a template for RNA-dependent DNA polymerases (e.g. reverse transcriptase) that synthesize the new strands." [GOC:mah, ISBN:0198506732]	POL32(YJR043C);RIF2(YLR453C);POL31(YJR006W)
GO:0006950	13 of 35 (37.1%)	4.84	2.68	552 of 3988 (13.8%)	0.000472	0.102	response to stress	"Any process that results in a change in state or activity of a cell or an organism (in terms of movement, secretion, enzyme production, gene expression, etc.) as a result of a disturbance in organismal or cellular homeostasis, usually, but not necessarily, exogenous (e.g. temperature, humidity, ionizing radiation)." [GOC:mah]	PAU24(YBR301W);GPD1(YDL022W);SKN7(YHR206W);POL32(YJR043C);RAD27(YKL113C);RAD5(YLR032W);PSO2(YMR137C);YNL190W(YNL190W);ELG1(YOR144C);REV1(YOR346W);RFC5(YBR087W);POL31(YJR006W);RFC4(YOL094C)
GO:0006259	10 of 35 (28.6%)	3.01	3.32	343 of 3988 (8.6%)	0.000505	0.104	DNA metabolic process	"Any cellular metabolic process involving deoxyribonucleic acid. This is one of the two main types of nucleic acid, consisting of a long, unbranched macromolecule formed from one, or more commonly, two, strands of linked deoxyribonucleotides." [ISBN:0198506732]	POL32(YJR043C);RAD27(YKL113C);RAD5(YLR032W);RIF2(YLR453C);PSO2(YMR137C);ELG1(YOR144C);REV1(YOR346W);RFC5(YBR087W);POL31(YJR006W);RFC4(YOL094C)
GO:0050896	16 of 35 (45.7%)	7.28	2.20	830 of 3988 (20.8%)	0.000788	0.154	response to stimulus	"Any process that results in a change in state or activity of a cell or an organism (in terms of movement, secretion, enzyme production, gene expression, etc.) as a result of a stimulus. The process begins with detection of the stimulus and ends with a change in state or activity or the cell or organism." [GOC:ai, GOC:bf]	PAU24(YBR301W);GPD1(YDL022W);SKN7(YHR206W);POL32(YJR043C);RAD27(YKL113C);STE6(YKL209C);RAD5(YLR032W);PSO2(YMR137C);YNL190W(YNL190W);ELG1(YOR144C);REV1(YOR346W);RFC5(YBR087W);YPP1(YGR198W);EXO70(YJL085W);POL31(YJR006W);RFC4(YOL094C)
GO:0051716	13 of 35 (37.1%)	5.72	2.27	652 of 3988 (16.3%)	0.00235	0.436	cellular response to stimulus	"Any process that results in a change in state or activity of a cell (in terms of movement, secretion, enzyme production, gene expression, etc.) as a result of a stimulus. The process begins with detection of the stimulus by a cell and ends with a change in state or activity or the cell." [GOC:bf, GOC:jl]	GPD1(YDL022W);SKN7(YHR206W);POL32(YJR043C);RAD27(YKL113C);RAD5(YLR032W);PSO2(YMR137C);YNL190W(YNL190W);ELG1(YOR144C);REV1(YOR346W);RFC5(YBR087W);EXO70(YJL085W);POL31(YJR006W);RFC4(YOL094C)
GO:0042276	2 of 35 (5.7%)	0.09	22.79	10 of 3988 (0.3%)	0.00322	0.571	error-prone translesion synthesis	"The conversion of DNA-damage induced single-stranded gaps into large molecular weight DNA after replication by using a specialized DNA polymerase or replication complex to insert a defined nucleotide across the lesion. This process does not remove the replication-blocking lesions and causes an increase in the endogenous mutation level. For example, in E. coli, a low fidelity DNA polymerase, pol …	RAD5(YLR032W);REV1(YOR346W)
GO:0065008	8 of 35 (22.9%)	2.66	3.01	303 of 3988 (7.6%)	0.00388	0.657	regulation of biological quality	"Any process that modulates a qualitative or quantitative trait of a biological quality. A biological quality is a measurable attribute of an organism or part of an organism, such as size, mass, shape, color, etc." [GOC:dph, GOC:isa_complete, GOC:mah, GOC:pr, GOC:vw]	GPD1(YDL022W);SKN7(YHR206W);MNR2(YKL064W);STE6(YKL209C);RAD5(YLR032W);RIF2(YLR453C);ELG1(YOR144C);FSF1(YOR271C)
GO:0019985	2 of 35 (5.7%)	0.11	18.99	12 of 3988 (0.3%)	0.00467	0.759	translesion synthesis	"The replication of damaged DNA by synthesis across a lesion in the template strand; a specialized DNA polymerase or replication complex inserts a defined nucleotide across from the lesion which allows DNA synthesis to continue beyond the lesion. This process can be mutagenic depending on the damaged nucleotide and the inserted nucleotide." [GOC:elh, PMID:10535901]	RAD5(YLR032W);REV1(YOR346W)
GO:0007062	3 of 35 (8.6%)	0.36	8.34	41 of 3988 (1.0%)	0.00526	0.819	sister chromatid cohesion	"The cell cycle process in which the sister chromatids of a replicated chromosome are joined along the entire length of the chromosome." [GOC:mah, ISBN:0815316194]	ELG1(YOR144C);RFC5(YBR087W);RFC4(YOL094C)
GO:0042592	6 of 35 (17.1%)	1.67	3.60	190 of 3988 (4.8%)	0.00552	0.827	homeostatic process	"Any biological process involved in the maintenance of an internal steady state." [GOC:jl, ISBN:0395825172]	GPD1(YDL022W);MNR2(YKL064W);RAD5(YLR032W);RIF2(YLR453C);ELG1(YOR144C);FSF1(YOR271C)
GO:0006973	1 of 35 (2.9%)	0.01	113.94	1 of 3988 (0.0%)	0.00878	0.877	intracellular accumulation of glycerol	"The accumulation of glycerol within a cell, for example by increased glycerol biosynthesis combined with decreased permeability of the cell membrane to glycerol, in response to the detection of a hyperosmotic environment." [GOC:jl, PMID:11752666]	GPD1(YDL022W)
GO:0010961	1 of 35 (2.9%)	0.01	113.94	1 of 3988 (0.0%)	0.00878	0.877	cellular magnesium ion homeostasis	"Any process involved in the maintenance of an internal steady state of magnesium ions at the level of a cell." [GOC:dph, GOC:tb]	MNR2(YKL064W)
GO:0010960	1 of 35 (2.9%)	0.01	113.94	1 of 3988 (0.0%)	0.00878	0.877	magnesium ion homeostasis	"Any process involved in the maintenance of an internal steady state of magnesium ions within an organism or cell." [GOC:dph, GOC:tb]	MNR2(YKL064W)
GO:0006286	1 of 35 (2.9%)	0.01	113.94	1 of 3988 (0.0%)	0.00878	0.877	base-excision repair, base-free sugar-phosphate removal	"Excision of the sugar phosphate residue at an AP site, i.e. a deoxyribose sugar with a missing base, by a phosphodiesterase enzyme." [ISBN:0815316194]	RAD27(YKL113C)
GO:0000770	1 of 35 (2.9%)	0.01	113.94	1 of 3988 (0.0%)	0.00878	0.877	peptide pheromone export	"The directed movement of a peptide pheromone out of a cell by a secretion or export pathway used solely for the export of peptide pheromones." [GOC:elh]	STE6(YKL209C)
GO:0030072	1 of 35 (2.9%)	0.01	113.94	1 of 3988 (0.0%)	0.00878	0.877	peptide hormone secretion	"The regulated release of a peptide hormone from a cell or organ." [GOC:mah]	STE6(YKL209C)
GO:0002790	1 of 35 (2.9%)	0.01	113.94	1 of 3988 (0.0%)	0.00878	0.877	peptide secretion	"The controlled release of a peptide from a cell or group of cells." [GOC:add]	STE6(YKL209C)
GO:0046879	1 of 35 (2.9%)	0.01	113.94	1 of 3988 (0.0%)	0.00878	0.877	hormone secretion	"The regulated release of hormones, substances with a specific regulatory effect on a particular organ or group of cells." [ISBN:0198506732]	STE6(YKL209C)
GO:0009914	1 of 35 (2.9%)	0.01	113.94	1 of 3988 (0.0%)	0.00878	0.877	hormone transport	"The directed movement of hormones into, out of or within a cell, or between cells, by means of some agent such as a transporter or pore." [GOC:tb]	STE6(YKL209C)
GO:0023061	1 of 35 (2.9%)	0.01	113.94	1 of 3988 (0.0%)	0.00878	0.877	signal release	"The process in which a signal is secreted or discharged into the extracellular medium from a cellular source." [GOC:mtg_signal]	STE6(YKL209C)
GO:0010817	1 of 35 (2.9%)	0.01	113.94	1 of 3988 (0.0%)	0.00878	0.877	regulation of hormone levels	"Any process that modulates the levels of hormone within an organism or a tissue. A hormone is any substance formed in very small amounts in one specialized organ or group of cells and carried (sometimes in the bloodstream) to another organ or group of cells in the same organism, upon which it has a specific regulatory action." [GOC:BHF, GOC:dph, GOC:tb]	STE6(YKL209C)
GO:0003001	1 of 35 (2.9%)	0.01	113.94	1 of 3988 (0.0%)	0.00878	0.877	generation of a signal involved in cell-cell signaling	"The cellular process that creates a physical entity or change in state, i.e. a signal, that originates in one cell and is used to transfer information to another cell. This process begins with the initial formation of the signal and ends with the mature form and placement of the signal." [GOC:dph]	STE6(YKL209C)
GO:0007267	1 of 35 (2.9%)	0.01	113.94	1 of 3988 (0.0%)	0.00878	0.877	cell-cell signaling	"Any process that mediates the transfer of information from one cell to another." [GOC:mah]	STE6(YKL209C)
GO:0046168	1 of 35 (2.9%)	0.02	56.97	2 of 3988 (0.1%)	0.0175	1	glycerol-3-phosphate catabolic process	"The chemical reactions and pathways resulting in the breakdown of glycerol-3-phosphate, a phosphoric monoester of glycerol." [GOC:ai]	GPD1(YDL022W)
GO:0034553	1 of 35 (2.9%)	0.02	56.97	2 of 3988 (0.1%)	0.0175	1	mitochondrial respiratory chain complex II assembly	"The aggregation, arrangement and bonding together of a set of components to form respiratory chain complex II, in the mitochondrial inner membrane." [GOC:dgf]	YDR379C-A(YDR379C-A)
GO:0034552	1 of 35 (2.9%)	0.02	56.97	2 of 3988 (0.1%)	0.0175	1	respiratory chain complex II assembly	"The aggregation, arrangement and bonding together of a set of components to form respiratory chain complex II." [GOC:dgf]	YDR379C-A(YDR379C-A)
GO:0097032	1 of 35 (2.9%)	0.02	56.97	2 of 3988 (0.1%)	0.0175	1	mitochondrial respiratory chain complex II biogenesis	"The biogenesis of a mitochondrial respiratory chain complex II, a protein complex located in the mitochondrial inner membrane that forms part of the mitochondrial respiratory chain. Includes the synthesis of constituent proteins and their aggregation, arrangement and bonding together." [GOC:pr]	YDR379C-A(YDR379C-A)
GO:0000734	1 of 35 (2.9%)	0.02	56.97	2 of 3988 (0.1%)	0.0175	1	gene conversion at mating-type locus, DNA repair synthesis	"Synthesis of DNA that proceeds from the broken 3' single-strand DNA end uses the homologous intact duplex as the template during gene conversion at the mating-type locus." [GOC:elh]	RAD27(YKL113C)
GO:0042631	1 of 35 (2.9%)	0.02	56.97	2 of 3988 (0.1%)	0.0175	1	cellular response to water deprivation	"Any process that results in a change in state or activity of a cell (in terms of movement, secretion, enzyme production, gene expression, etc.) as a result of deprivation of water." [GOC:go_curators]	YNL190W(YNL190W)
GO:0009414	1 of 35 (2.9%)	0.02	56.97	2 of 3988 (0.1%)	0.0175	1	response to water deprivation	"Any process that results in a change in state or activity of a cell or an organism (in terms of movement, secretion, enzyme production, gene expression, etc.) as a result of a water deprivation stimulus, prolonged deprivation of water." [GOC:lr]	YNL190W(YNL190W)
GO:0006072	1 of 35 (2.9%)	0.03	37.98	3 of 3988 (0.1%)	0.0261	1	glycerol-3-phosphate metabolic process	"The chemical reactions and pathways involving glycerol-3-phosphate, a phosphoric monoester of glycerol." [GOC:go_curators, ISBN:0198506732]	GPD1(YDL022W)
GO:0000304	1 of 35 (2.9%)	0.03	37.98	3 of 3988 (0.1%)	0.0261	1	response to singlet oxygen	"Any process that results in a change in state or activity of a cell or an organism (in terms of movement, secretion, enzyme production, gene expression, etc.) as a result of a singlet oxygen stimulus. Singlet oxygen is a dioxygen (O2) molecule in which two 2p electrons have similar spin. Singlet oxygen is more highly reactive than the form in which these electrons are of opposite spin, and it is…	SKN7(YHR206W)
GO:0010994	1 of 35 (2.9%)	0.03	37.98	3 of 3988 (0.1%)	0.0261	1	free ubiquitin chain polymerization	"The process of creating free ubiquitin chains, compounds composed of a large number of ubiquitin monomers. These chains are not conjugated to a protein." [GOC:BHF, GOC:dph, GOC:tb]	RAD5(YLR032W)
GO:0051436	1 of 35 (2.9%)	0.03	37.98	3 of 3988 (0.1%)	0.0261	1	negative regulation of ubiquitin-protein ligase activity involved in mitotic cell cycle	"Any process that stops, prevents, or reduces the frequency, rate or extent of ubiquitin ligase activity that contributes to the mitotic cell cycle." [GOC:ai, GOC:tb]	ACM1(YPL267W)
GO:0071214	2 of 35 (5.7%)	0.29	6.91	33 of 3988 (0.8%)	0.0333	1	cellular response to abiotic stimulus	"Any process that results in a change in state or activity of a cell (in terms of movement, secretion, enzyme production, gene expression, etc.) as a result of an abiotic (non-living) stimulus." [GOC:mah]	GPD1(YDL022W);YNL190W(YNL190W)
GO:0006401	3 of 35 (8.6%)	0.72	4.17	82 of 3988 (2.1%)	0.0342	1	RNA catabolic process	"The chemical reactions and pathways resulting in the breakdown of RNA, ribonucleic acid, one of the two main type of nucleic acid, consisting of a long, unbranched macromolecule formed from ribonucleotides joined in 3',5'-phosphodiester linkage." [ISBN:0198506732]	POL32(YJR043C);RAD27(YKL113C);POL31(YJR006W)
GO:0000731	1 of 35 (2.9%)	0.04	28.49	4 of 3988 (0.1%)	0.0347	1	DNA synthesis involved in DNA repair	"Synthesis of DNA that proceeds from the broken 3' single-strand DNA end uses the homologous intact duplex as the template." [PMID:10357855]	RAD27(YKL113C)
GO:0010993	1 of 35 (2.9%)	0.04	28.49	4 of 3988 (0.1%)	0.0347	1	regulation of ubiquitin homeostasis	"Any process that modulates the rate, frequency, or extent of ubiquitin homeostasis. Ubiquitin homeostasis is any process involved in the maintenance of an internal steady state of ubiquitin monomers and free ubiquitin chains at the level of the cell." [GOC:BHF, GOC:dph, GOC:tb]	RAD5(YLR032W)
GO:0010992	1 of 35 (2.9%)	0.04	28.49	4 of 3988 (0.1%)	0.0347	1	ubiquitin homeostasis	"Any process involved in the maintenance of an internal steady state of ubiquitin monomers and free ubiquitin chains at the level of the cell." [GOC:BHF, GOC:dph, GOC:tb]	RAD5(YLR032W)
GO:0071462	1 of 35 (2.9%)	0.04	28.49	4 of 3988 (0.1%)	0.0347	1	cellular response to water stimulus	"Any process that results in a change in state or activity of a cell (in terms of movement, secretion, enzyme production, gene expression, etc.) as a result of a stimulus reflecting the presence, absence, or concentration of water." [GOC:mah]	YNL190W(YNL190W)
GO:0009415	1 of 35 (2.9%)	0.04	28.49	4 of 3988 (0.1%)	0.0347	1	response to water stimulus	"Any process that results in a change in state or activity of a cell or an organism (in terms of movement, secretion, enzyme production, gene expression, etc.) as a result of a stimulus reflecting the presence, absence, or concentration of water." [GOC:jl]	YNL190W(YNL190W)
GO:0051444	1 of 35 (2.9%)	0.04	28.49	4 of 3988 (0.1%)	0.0347	1	negative regulation of ubiquitin-protein ligase activity	"Any process that stops, prevents, or reduces the frequency, rate or extent of ubiquitin ligase activity, the catalysis of the reaction: ATP + ubiquitin + protein lysine = AMP + diphosphate + protein N-ubiquityllysine." [EC:6.3.2.19, GOC:ai, GOC:tb]	ACM1(YPL267W)
GO:0031397	1 of 35 (2.9%)	0.04	28.49	4 of 3988 (0.1%)	0.0347	1	negative regulation of protein ubiquitination	"Any process that stops, prevents, or reduces the frequency, rate or extent of the addition of ubiquitin groups to a protein." [GOC:mah]	ACM1(YPL267W)
GO:0051352	1 of 35 (2.9%)	0.04	28.49	4 of 3988 (0.1%)	0.0347	1	negative regulation of ligase activity	"Any process that stops or reduces the rate of ligase activity, the catalysis of the ligation of two substances with concomitant breaking of a diphosphate linkage, usually in a nucleoside triphosphate." [GOC:ai]	ACM1(YPL267W)
GO:0001927	1 of 35 (2.9%)	0.04	28.49	4 of 3988 (0.1%)	0.0347	1	exocyst assembly	"The aggregation, arrangement and bonding together of various polypeptides into the exocyst complex." [GOC:hjd, PMID:9700152, Wikipedia:Exocyst]	EXO70(YJL085W)
GO:0016567	3 of 35 (8.6%)	0.76	3.93	87 of 3988 (2.2%)	0.0397	1	protein ubiquitination	"The process in which one or more ubiquitin groups are added to a protein." [GOC:ai]	DAS1(YJL149W);RAD5(YLR032W);ACM1(YPL267W)
GO:0000724	2 of 35 (5.7%)	0.32	6.16	37 of 3988 (0.9%)	0.0411	1	double-strand break repair via homologous recombination	"The error-free repair of a double-strand break in DNA in which the broken DNA molecule is repaired using homologous sequences. A strand in the broken DNA searches for a homologous region in an intact chromosome to serve as the template for DNA synthesis. The restoration of two intact DNA molecules results in the exchange, reciprocal or nonreciprocal, of genetic material between the intact DNA mo…	POL32(YJR043C);ELG1(YOR144C)
GO:0000160	1 of 35 (2.9%)	0.04	22.79	5 of 3988 (0.1%)	0.0431	1	phosphorelay signal transduction system	"A conserved series of molecular signals found in prokaryotes and eukaryotes; involves autophosphorylation of a histidine kinase and the transfer of the phosphate group to an aspartate that then acts as a phospho-donor to response regulator proteins." [PMID:9191038]	SKN7(YHR206W)
GO:0043619	1 of 35 (2.9%)	0.04	22.79	5 of 3988 (0.1%)	0.0431	1	regulation of transcription from RNA polymerase II promoter in response to oxidative stress	"Modulation of the frequency, rate or extent of transcription from an RNA polymerase II promoter as a result of a stimulus indicating the organism is under oxidative stress, a state often resulting from exposure to high levels of reactive oxygen species, e.g. superoxide anions, hydrogen peroxide (H2O2), and hydroxyl radicals." [GOC:jl]	SKN7(YHR206W)
GO:0051439	1 of 35 (2.9%)	0.04	22.79	5 of 3988 (0.1%)	0.0431	1	regulation of ubiquitin-protein ligase activity involved in mitotic cell cycle	"A cell cycle process that modulates the frequency, rate or extent of ubiquitin ligase activity that contributes to the mitotic cell cycle." [GOC:ai]	ACM1(YPL267W)
GO:0006898	1 of 35 (2.9%)	0.04	22.79	5 of 3988 (0.1%)	0.0431	1	receptor-mediated endocytosis	"An endocytosis process in which cell surface receptors ensure specificity of transport. A specific receptor on the cell surface binds tightly to the extracellular macromolecule (the ligand) that it recognizes; the plasma-membrane region containing the receptor-ligand complex then undergoes endocytosis, forming a transport vesicle containing the receptor-ligand complex and excluding most other pl…	YPP1(YGR198W)
GO:0051601	1 of 35 (2.9%)	0.04	22.79	5 of 3988 (0.1%)	0.0431	1	exocyst localization	"Any process in which an exocyst is transported to, or maintained in, a specific location. An exocyst is a protein complex peripherally associated with the plasma membrane that determines where vesicles dock and fuse." [GOC:ai]	EXO70(YJL085W)
GO:0006289	2 of 35 (5.7%)	0.33	6.00	38 of 3988 (1.0%)	0.0432	1	nucleotide-excision repair	"A DNA repair process in which a small region of the strand surrounding the damage is removed from the DNA helix as an oligonucleotide. The small gap left in the DNA helix is filled in by the sequential action of DNA polymerase and DNA ligase. Nucleotide excision repair recognizes a wide range of substrates, including damage caused by UV irradiation (pyrimidine dimers and 6-4 photoproducts) and c…	POL32(YJR043C);POL31(YJR006W)
GO:1901700	2 of 35 (5.7%)	0.34	5.84	39 of 3988 (1.0%)	0.0453	1	response to oxygen-containing compound	"Any process that results in a change in state or activity of a cell or an organism (in terms of movement, secretion, enzyme production, gene expression, etc.) as a result of an oxygen-containing compound stimulus." [GOC:pr, GOC:TermGenie]	SKN7(YHR206W);YNL190W(YNL190W)
GO:0046903	2 of 35 (5.7%)	0.35	5.70	40 of 3988 (1.0%)	0.0474	1	secretion	"The controlled release of a substance by a cell, a group of cells, or a tissue." [GOC:ai]	STE6(YKL209C);EXO70(YJL085W)
GO:0032940	2 of 35 (5.7%)	0.35	5.70	40 of 3988 (1.0%)	0.0474	1	secretion by cell	"The controlled release of a substance by a cell." [GOC:mah]	STE6(YKL209C);EXO70(YJL085W)
Depleted
GO:0010467	4 of 35 (11.4%)	9.55	0.42	1088 of 3988 (27.3%)	0.0209	1	gene expression	"The process in which a gene's sequence is converted into a mature gene product or products (proteins or RNA). This includes the production of an RNA transcript as well as any processing to produce a mature RNA product or an mRNA (for protein-coding genes) and the translation of that mRNA into protein. Some protein processing events may be included when they are required to form an active form of…	TBS1(YBR150C);SKN7(YHR206W);ACM1(YPL267W);RPC37(YKR025W)
GO:0044710	3 of 35 (8.6%)	7.79	0.38	888 of 3988 (22.3%)	0.0312	1	single-organism metabolic process	"A metabolic process - chemical reactions and pathways, including anabolism and catabolism, by which living organisms transform chemical substances - which involves a single organism." [GOC:jl]	GPD1(YDL022W);STE6(YKL209C);PLB2(YMR006C)
GO:0019538	4 of 35 (11.4%)	8.87	0.45	1011 of 3988 (25.4%)	0.0366	1	protein metabolic process	"The chemical reactions and pathways involving a specific protein, rather than of proteins in general. Includes protein modification." [GOC:ma]	DAS1(YJL149W);RAD5(YLR032W);ACM1(YPL267W);PUP3(YER094C)
GO:0006396	0 of 35 (0.0%)	3.11	0.00	354 of 3988 (8.9%)	0.0381	1	RNA processing	"Any process involved in the conversion of one or more primary RNA transcripts into one or more mature RNA molecules." [GOC:mah]
MOLECULAR_FUNCTION
GO_term	set	expected	enrichment	background	p_fisher(1side)	fdr	Name	Description
GO:0004527	4 of 35 (11.4%)	0.23	17.53	26 of 3988 (0.7%)	6.48e-05	0.119	exonuclease activity	"Catalysis of the hydrolysis of ester linkages within nucleic acids by removing nucleotide residues from the 3' or 5' end." [GOC:mah, ISBN:0198547684]	POL32(YJR043C);RAD27(YKL113C);PSO2(YMR137C);POL31(YJR006W)
GO:0003887	3 of 35 (8.6%)	0.13	22.79	15 of 3988 (0.4%)	0.000262	0.119	DNA-directed DNA polymerase activity	"Catalysis of the reaction: deoxynucleoside triphosphate + DNA(n) = diphosphate + DNA(n+1); the synthesis of DNA from deoxyribonucleotide triphosphates in the presence of a DNA template and primer." [EC:2.7.7.7, ISBN:0198547684]	POL32(YJR043C);REV1(YOR346W);POL31(YJR006W)
GO:0034061	3 of 35 (8.6%)	0.13	22.79	15 of 3988 (0.4%)	0.000262	0.119	DNA polymerase activity	"Catalysis of the reaction: deoxynucleoside triphosphate + DNA(n) = diphosphate + DNA(n+1); the synthesis of DNA from deoxyribonucleotide triphosphates in the presence of a nucleic acid template and primer." [EC:2.7.7.7, GOC:mah]	POL32(YJR043C);REV1(YOR346W);POL31(YJR006W)
GO:0008310	2 of 35 (5.7%)	0.04	56.97	4 of 3988 (0.1%)	0.000444	0.119	single-stranded DNA specific 3'-5' exodeoxyribonuclease activity	"Catalysis of the sequential cleavage of mononucleotides from a free 3' terminus of a single-stranded DNA molecule." [GOC:mah]	POL32(YJR043C);POL31(YJR006W)
GO:0008297	2 of 35 (5.7%)	0.04	56.97	4 of 3988 (0.1%)	0.000444	0.119	single-stranded DNA specific exodeoxyribonuclease activity	"Catalysis of the sequential cleavage of mononucleotides from a free 5' or 3' terminus of a single-stranded DNA molecule." [GOC:mah]	POL32(YJR043C);POL31(YJR006W)
GO:0003689	2 of 35 (5.7%)	0.04	56.97	4 of 3988 (0.1%)	0.000444	0.119	DNA clamp loader activity	"Catalysis of the reaction: ATP + H2O = ADP + phosphate, to drive the opening of the ring structure of the PCNA complex, or any of the related sliding clamp complexes, and their closing around the DNA duplex." [GOC:mah, GOC:vw, PMID:16082778]	RFC5(YBR087W);RFC4(YOL094C)
GO:0033170	2 of 35 (5.7%)	0.04	56.97	4 of 3988 (0.1%)	0.000444	0.119	protein-DNA loading ATPase activity	"Catalysis of the reaction: ATP + H2O = ADP + phosphate, to drive the assembly of a protein or protein complex onto a DNA molecule." [GOC:mah, GOC:vw]	RFC5(YBR087W);RFC4(YOL094C)
GO:0008409	2 of 35 (5.7%)	0.04	45.58	5 of 3988 (0.1%)	0.000736	0.173	5'-3' exonuclease activity	"Catalysis of the hydrolysis of ester linkages within nucleic acids by removing nucleotide residues from the 5' end." [GOC:ai]	RAD27(YKL113C);PSO2(YMR137C)
GO:0016779	4 of 35 (11.4%)	0.44	9.12	50 of 3988 (1.3%)	0.00086	0.18	nucleotidyltransferase activity	"Catalysis of the transfer of a nucleotidyl group to a reactant." [ISBN:0198506732]	POL32(YJR043C);REV1(YOR346W);POL31(YJR006W);RPC37(YKR025W)
GO:0008296	2 of 35 (5.7%)	0.05	37.98	6 of 3988 (0.2%)	0.0011	0.19	3'-5'-exodeoxyribonuclease activity	"Catalysis of the sequential cleavage of mononucleotides from a free 3' terminus of a DNA molecule." [GOC:mah]	POL32(YJR043C);POL31(YJR006W)
GO:0003677	10 of 35 (28.6%)	3.33	3.01	379 of 3988 (9.5%)	0.00111	0.19	DNA binding	"Any molecular function by which a gene product interacts selectively and non-covalently with DNA (deoxyribonucleic acid)." [GOC:dph, GOC:jl, GOC:tb, GOC:vw]	TBS1(YBR150C);SKN7(YHR206W);RAD27(YKL113C);RAD5(YLR032W);RIF2(YLR453C);PSO2(YMR137C);REV1(YOR346W);RFC5(YBR087W);POL31(YJR006W);RFC4(YOL094C)
GO:0004536	3 of 35 (8.6%)	0.23	13.15	26 of 3988 (0.7%)	0.0014	0.22	deoxyribonuclease activity	"Catalysis of the hydrolysis of ester linkages within deoxyribonucleic acid." [GOC:mah, ISBN:0198547684]	POL32(YJR043C);RAD27(YKL113C);POL31(YJR006W)
GO:0016895	2 of 35 (5.7%)	0.06	32.56	7 of 3988 (0.2%)	0.00153	0.221	exodeoxyribonuclease activity, producing 5'-phosphomonoesters	"Catalysis of the hydrolysis of ester linkages within deoxyribonucleic acids by removing nucleotide residues from the 3' or 5' end to yield 5' phosphomonoesters." [GOC:ai]	POL32(YJR043C);POL31(YJR006W)
GO:0004529	2 of 35 (5.7%)	0.07	28.49	8 of 3988 (0.2%)	0.00203	0.272	exodeoxyribonuclease activity	"Catalysis of the sequential cleavage of mononucleotides from a free 5' or 3' terminus of a DNA molecule." [GOC:mah, ISBN:0198547684]	POL32(YJR043C);POL31(YJR006W)
GO:0004518	4 of 35 (11.4%)	0.61	6.61	69 of 3988 (1.7%)	0.00287	0.36	nuclease activity	"Catalysis of the hydrolysis of ester linkages within nucleic acids." [ISBN:0198547684]	POL32(YJR043C);RAD27(YKL113C);PSO2(YMR137C);POL31(YJR006W)
GO:0008094	3 of 35 (8.6%)	0.40	7.43	46 of 3988 (1.2%)	0.00726	0.75	DNA-dependent ATPase activity	"Catalysis of the reaction: ATP + H2O = ADP + phosphate; this reaction requires the presence of single- or double-stranded DNA, and it drives another reaction." [EC:3.6.1.3, GOC:jl]	RAD5(YLR032W);RFC5(YBR087W);RFC4(YOL094C)
GO:0008408	2 of 35 (5.7%)	0.14	14.24	16 of 3988 (0.4%)	0.00831	0.75	3'-5' exonuclease activity	"Catalysis of the hydrolysis of ester linkages within nucleic acids by removing nucleotide residues from the 3' end." [GOC:ai]	POL32(YJR043C);POL31(YJR006W)
GO:0016796	2 of 35 (5.7%)	0.14	14.24	16 of 3988 (0.4%)	0.00831	0.75	exonuclease activity, active with either ribo- or deoxyribonucleic acids and producing 5'-phosphomonoesters	"Catalysis of the hydrolysis of ester linkages within nucleic acids by removing nucleotide residues from the 3' or 5' end to yield 5' phosphomonoesters." [GOC:mah]	POL32(YJR043C);POL31(YJR006W)
GO:0017125	1 of 35 (2.9%)	0.01	113.94	1 of 3988 (0.0%)	0.00878	0.75	deoxycytidyl transferase activity	"Catalysis of the insertion of a dCMP residue opposite a template abasic site in DNA." [PMID:10535901]	REV1(YOR346W)
GO:0055105	1 of 35 (2.9%)	0.01	113.94	1 of 3988 (0.0%)	0.00878	0.75	ubiquitin-protein ligase inhibitor activity	"Stops, prevents or reduces the activity of a ubiquitin-protein ligase." [GOC:BHF, GOC:rl]	ACM1(YPL267W)
GO:0055104	1 of 35 (2.9%)	0.01	113.94	1 of 3988 (0.0%)	0.00878	0.75	ligase inhibitor activity	"Stops, prevents or reduces the activity of a ligase." [GOC:BHF, GOC:rl]	ACM1(YPL267W)
GO:0061133	1 of 35 (2.9%)	0.01	113.94	1 of 3988 (0.0%)	0.00878	0.75	endopeptidase activator activity	"Increases the activity of an endopeptidase, any enzyme that hydrolyzes nonterminal peptide bonds in polypeptides." [GOC:dph, GOC:tb]	PUP3(YER094C)
GO:0003684	2 of 35 (5.7%)	0.19	10.36	22 of 3988 (0.6%)	0.0155	1	damaged DNA binding	"Interacting selectively and non-covalently with damaged DNA." [GOC:jl]	PSO2(YMR137C);REV1(YOR346W)
GO:0004367	1 of 35 (2.9%)	0.02	56.97	2 of 3988 (0.1%)	0.0175	1	glycerol-3-phosphate dehydrogenase [NAD+] activity	"Catalysis of the reaction: sn-glycerol 3-phosphate + NAD+ = glycerone phosphate + NADH + H+." [EC:1.1.1.8]	GPD1(YDL022W)
GO:0004622	1 of 35 (2.9%)	0.02	56.97	2 of 3988 (0.1%)	0.0175	1	lysophospholipase activity	"Catalysis of the reaction: 2-lysophosphatidylcholine + H2O = glycerophosphocholine + a carboxylate." [EC:3.1.1.5]	PLB2(YMR006C)
GO:0016504	1 of 35 (2.9%)	0.02	56.97	2 of 3988 (0.1%)	0.0175	1	peptidase activator activity	"Increases the activity of a peptidase, any enzyme that catalyzes the hydrolysis peptide bonds." [GOC:ai]	PUP3(YER094C)
GO:0017049	1 of 35 (2.9%)	0.02	56.97	2 of 3988 (0.1%)	0.0175	1	GTP-Rho binding	"Interacting selectively and non-covalently with the GTP-bound form of the Rho protein." [GOC:mah]	EXO70(YJL085W)
GO:0042623	4 of 35 (11.4%)	1.13	3.53	129 of 3988 (3.2%)	0.0252	1	ATPase activity, coupled	"Catalysis of the reaction: ATP + H2O = ADP + phosphate; this reaction directly drives some other reaction, for example ion transport across a membrane." [EC:3.6.1.3, GOC:jl]	STE6(YKL209C);RAD5(YLR032W);RFC5(YBR087W);RFC4(YOL094C)
GO:0015095	1 of 35 (2.9%)	0.03	37.98	3 of 3988 (0.1%)	0.0261	1	magnesium ion transmembrane transporter activity	"Catalysis of the transfer of magnesium (Mg) ions from one side of a membrane to the other." [GOC:dgf]	MNR2(YKL064W)
GO:0015440	1 of 35 (2.9%)	0.03	37.98	3 of 3988 (0.1%)	0.0261	1	peptide-transporting ATPase activity	"Catalysis of the reaction: ATP + H2O + peptide(in) = ADP + phosphate + peptide(out). Peptides exported include alpha-hemolysin, cyclolysin, colicin V and siderophores from Gram-negative bacteria, and bacteriocin, subtilin, competence factor and pediocin from Gram-positive bacteria." [EC:3.6.3.43]	STE6(YKL209C)
GO:0009378	1 of 35 (2.9%)	0.03	37.98	3 of 3988 (0.1%)	0.0261	1	four-way junction helicase activity	"Catalysis of the unwinding of the DNA helix of DNA containing four-way junctions, including Holliday junctions." [GOC:jl, PMID:9442895]	RAD5(YLR032W)
GO:0000403	1 of 35 (2.9%)	0.03	37.98	3 of 3988 (0.1%)	0.0261	1	Y-form DNA binding	"Interacting selectively and non-covalently with segment of DNA shaped like a Y. This shape occurs when DNA contains a region of paired double-stranded DNA on one end and a region of unpaired DNA strands on the opposite end." [GOC:elh, PMID:16781730]	RAD5(YLR032W)
GO:0003676	11 of 35 (31.4%)	6.09	1.81	694 of 3988 (17.4%)	0.0304	1	nucleic acid binding	"Interacting selectively and non-covalently with any nucleic acid." [GOC:jl]	TBS1(YBR150C);YGR001C(YGR001C);SKN7(YHR206W);RAD27(YKL113C);RAD5(YLR032W);RIF2(YLR453C);PSO2(YMR137C);REV1(YOR346W);RFC5(YBR087W);POL31(YJR006W);RFC4(YOL094C)
GO:0016788	5 of 35 (14.3%)	1.82	2.75	207 of 3988 (5.2%)	0.0327	1	hydrolase activity, acting on ester bonds	"Catalysis of the hydrolysis of any ester bond." [GOC:jl]	POL32(YJR043C);RAD27(YKL113C);PLB2(YMR006C);PSO2(YMR137C);POL31(YJR006W)
GO:0000156	1 of 35 (2.9%)	0.04	28.49	4 of 3988 (0.1%)	0.0347	1	phosphorelay response regulator activity	"Responds to a phosphorelay sensor to initiate a change in cell state or activity. The activity of the response regulator is regulated by transfer of a phosphate from a histidine residue in the sensor, to an aspartate residue in the response regulator. Many but not all response regulators act as transcriptional regulators to elicit a response." [GOC:bf, PMID:10966457, PMID:11842140]	SKN7(YHR206W)
GO:0055106	1 of 35 (2.9%)	0.04	28.49	4 of 3988 (0.1%)	0.0347	1	ubiquitin-protein ligase regulator activity	"Modulates the activity of a ubiquitin-protein ligase, an enzyme that catalyzes the covalent attachment of ubiquitin to lysine in a substrate protein." [GOC:BHF, GOC:rl]	ACM1(YPL267W)
GO:0055103	1 of 35 (2.9%)	0.04	28.49	4 of 3988 (0.1%)	0.0347	1	ligase regulator activity	"Modulates the activity of a ligase." [GOC:BHF, GOC:rl]	ACM1(YPL267W)
GO:0061135	1 of 35 (2.9%)	0.04	28.49	4 of 3988 (0.1%)	0.0347	1	endopeptidase regulator activity	"Modulates the activity of a peptidase, any enzyme that hydrolyzes nonterminal peptide bonds in polypeptides." [GOC:dph, GOC:tb]	PUP3(YER094C)
GO:0017048	1 of 35 (2.9%)	0.04	28.49	4 of 3988 (0.1%)	0.0347	1	Rho GTPase binding	"Interacting selectively and non-covalently with Rho protein, any member of the Rho subfamily of the Ras superfamily of monomeric GTPases. Proteins in the Rho subfamily are involved in relaying signals from cell-surface receptors to the actin cytoskeleton." [ISBN:0198547684, PMID:12581856]	EXO70(YJL085W)
GO:0017108	1 of 35 (2.9%)	0.04	22.79	5 of 3988 (0.1%)	0.0431	1	5'-flap endonuclease activity	"Catalysis of the cleavage of a 5' flap structure in DNA, but not other DNA structures; processes the 5' ends of Okazaki fragments in lagging strand DNA synthesis." [PMID:9778254]	RAD27(YKL113C)
GO:0048256	1 of 35 (2.9%)	0.04	22.79	5 of 3988 (0.1%)	0.0431	1	flap endonuclease activity	"Catalysis of the cleavage of a flap structure in DNA, but not other DNA structures; processes the ends of Okazaki fragments in lagging strand DNA synthesis." [GOC:jid]	RAD27(YKL113C)
GO:0032934	1 of 35 (2.9%)	0.04	22.79	5 of 3988 (0.1%)	0.0431	1	sterol binding	"Interacting selectively and non-covalently with a sterol, any steroid containing a hydroxy group in the 3 position, closely related to cholestan-3-ol." [CHEBI:15889, GOC:mah]	PRY2(YKR013W)
GO:0005496	1 of 35 (2.9%)	0.04	22.79	5 of 3988 (0.1%)	0.0431	1	steroid binding	"Interacting selectively and non-covalently with a steroid, any of a large group of substances that have in common a ring system based on 1,2-cyclopentanoperhydrophenanthrene." [GOC:jl, ISBN:0198506732]	PRY2(YKR013W)
GO:0000400	1 of 35 (2.9%)	0.04	22.79	5 of 3988 (0.1%)	0.0431	1	four-way junction DNA binding	"Interacting selectively and non-covalently with DNA containing four-way junctions, also known as Holliday junctions, a structure where two DNA double strands are held together by reciprocal exchange of two of the four strands, one strand each from the two original helices." [GOC:krc, ISBN:0815332181, PMID:15563464]	RAD5(YLR032W)
GO:0004620	1 of 35 (2.9%)	0.04	22.79	5 of 3988 (0.1%)	0.0431	1	phospholipase activity	"Catalysis of the hydrolysis of a glycerophospholipid." [ISBN:0198506732]	PLB2(YMR006C)
GO:0061134	1 of 35 (2.9%)	0.04	22.79	5 of 3988 (0.1%)	0.0431	1	peptidase regulator activity	"Modulates the activity of a peptidase, any enzyme that catalyzes the hydrolysis peptide bonds." [GOC:dph, GOC:tb]	PUP3(YER094C)
GO:0016787	10 of 35 (28.6%)	5.73	1.74	653 of 3988 (16.4%)	0.0488	1	hydrolase activity	"Catalysis of the hydrolysis of various bonds, e.g. C-O, C-N, C-C, phosphoric anhydride bonds, etc. Hydrolase is the systematic name for any enzyme of EC class 3." [ISBN:0198506732]	POL32(YJR043C);RAD27(YKL113C);STE6(YKL209C);RAD5(YLR032W);PLB2(YMR006C);PSO2(YMR137C);RFC5(YBR087W);PUP3(YER094C);POL31(YJR006W);RFC4(YOL094C)
CELLULAR_COMPONENT
GO_term	set	expected	enrichment	background	p_fisher(1side)	fdr	Name	Description
GO:0031391	3 of 35 (8.6%)	0.04	85.46	4 of 3988 (0.1%)	2.46e-06	0.00193	Elg1 RFC-like complex	"A pentameric complex related to replication factor C, which loads the DNA polymerase processivity factor proliferating cell nuclear antigen (PCNA) onto DNA and has roles in telomere length regulation and other aspects of genome stability. In Saccharomyces the subunits are known as Elg1p, Rfc2p, Rfc3p, Rfc4p, and Rfc5p." [PMID:14614842]	ELG1(YOR144C);RFC5(YBR087W);RFC4(YOL094C)
GO:0005657	5 of 35 (14.3%)	0.36	13.90	41 of 3988 (1.0%)	2.31e-05	0.00907	replication fork	"The Y-shaped region of a replicating DNA molecule, resulting from the separation of the DNA strands and in which the synthesis of new strands takes place. Also includes associated protein complexes." [GOC:mah, ISBN:0198547684]	POL32(YJR043C);REV1(YOR346W);RFC5(YBR087W);POL31(YJR006W);RFC4(YOL094C)
GO:0043625	2 of 35 (5.7%)	0.03	75.96	3 of 3988 (0.1%)	0.000223	0.0438	delta DNA polymerase complex	"A multimeric DNA polymerase enzyme complex which differs in composition amongst species; in humans it is a heterotetramer of four subunits of approximately 125, 50, 68 and 12kDa, while in S. cerevisiae, it has three different subunits which form a heterotrimer, and the active enzyme is a dimer of this heterotrimer. Functions in DNA replication, mismatch repair and excision repair." [GOC:jl, ISBN…	POL32(YJR043C);POL31(YJR006W)
GO:0005663	2 of 35 (5.7%)	0.03	75.96	3 of 3988 (0.1%)	0.000223	0.0438	DNA replication factor C complex	"A complex of five polypeptides in eukaryotes, and two in prokaryotes, that loads the DNA polymerase processivity factor proliferating cell nuclear antigen (PCNA) onto DNA, thereby permitting processive DNA synthesis catalyzed by DNA polymerase." [PMID:14614842, PMID:14646196, PMID:16172520]	RFC5(YBR087W);RFC4(YOL094C)
GO:0044427	9 of 35 (25.7%)	2.27	3.96	259 of 3988 (6.5%)	0.000282	0.0443	chromosomal part	"Any constituent part of a chromosome, a structure composed of a very long molecule of DNA and associated proteins (e.g. histones) that carries hereditary information." [GOC:jl]	LIN1(YHR156C);POL32(YJR043C);RAD5(YLR032W);RIF2(YLR453C);ELG1(YOR144C);REV1(YOR346W);RFC5(YBR087W);POL31(YJR006W);RFC4(YOL094C)
GO:0031389	2 of 35 (5.7%)	0.04	56.97	4 of 3988 (0.1%)	0.000444	0.058	Rad17 RFC-like complex	"A pentameric protein complex related to replication factor C, which loads a trimeric complex of checkpoint proteins (known as the checkpoint clamp or 9-1-1 complex) onto DNA at damage sites; functions in DNA damage cell cycle checkpoints. In Schizosaccharomyces pombe the subunits are known as Rad17, Rfc2, Rfc3, Rfc4, and Rfc5, while in Saccharomyces cerevisiae the subunits are known as Rad24p, R…	RFC5(YBR087W);RFC4(YOL094C)
GO:0005694	9 of 35 (25.7%)	2.49	3.61	284 of 3988 (7.1%)	0.000562	0.063	chromosome	"A structure composed of a very long molecule of DNA and associated proteins (e.g. histones) that carries hereditary information." [ISBN:0198547684]	LIN1(YHR156C);POL32(YJR043C);RAD5(YLR032W);RIF2(YLR453C);ELG1(YOR144C);REV1(YOR346W);RFC5(YBR087W);POL31(YJR006W);RFC4(YOL094C)
GO:0031390	2 of 35 (5.7%)	0.05	37.98	6 of 3988 (0.2%)	0.0011	0.108	Ctf18 RFC-like complex	"A heptameric complex related to replication factor C, which loads the DNA polymerase processivity factor proliferating cell nuclear antigen (PCNA) onto DNA and plays a vital role in chromosome cohesion. In Saccharomyces the subunits are known as Ctf18p, Rfc2p, Rfc3p, Rfc4p, Rfc5p, Dcc1p, and Ctf8p." [PMID:14614842]	RFC5(YBR087W);RFC4(YOL094C)
GO:0042575	2 of 35 (5.7%)	0.07	28.49	8 of 3988 (0.2%)	0.00203	0.177	DNA polymerase complex	"A protein complex that possesses DNA polymerase activity and is involved in template directed synthesis of DNA." [GOC:jl, PMID:12045093]	POL32(YJR043C);POL31(YJR006W)
GO:0043601	2 of 35 (5.7%)	0.12	16.28	14 of 3988 (0.4%)	0.00637	0.419	nuclear replisome	"A multi-component enzymatic machine at the nuclear replication fork, which mediates DNA replication. Includes DNA primase, one or more DNA polymerases, DNA helicases, and other proteins." [GOC:jl, GOC:mtg_sensu]	POL32(YJR043C);POL31(YJR006W)
GO:0030894	2 of 35 (5.7%)	0.12	16.28	14 of 3988 (0.4%)	0.00637	0.419	replisome	"A multi-component enzymatic machine at the replication fork which mediates DNA replication. Includes DNA primase, one or more DNA polymerases, DNA helicases, and other proteins." [GOC:mah, GOC:vw]	POL32(YJR043C);POL31(YJR006W)
GO:0032993	3 of 35 (8.6%)	0.39	7.77	44 of 3988 (1.1%)	0.00641	0.419	protein-DNA complex	"A macromolecular complex containing both protein and DNA molecules." [GOC:mah]	POL32(YJR043C);RIF2(YLR453C);POL31(YJR006W)
GO:0005576	3 of 35 (8.6%)	0.54	5.60	61 of 3988 (1.5%)	0.0157	0.949	extracellular region	"The space external to the outermost structure of a cell. For cells without external protective or external encapsulating structures this refers to space outside of the plasma membrane. This term covers the host cell environment outside an intracellular parasite." [GOC:go_curators]	PAU24(YBR301W);PRY2(YKR013W);PLB2(YMR006C)
GO:0009277	3 of 35 (8.6%)	0.55	5.43	63 of 3988 (1.6%)	0.0172	0.952	fungal-type cell wall	"A rigid yet dynamic structure surrounding the plasma membrane that affords protection from stresses and contributes to cell morphogenesis, consisting of extensively cross-linked glycoproteins and carbohydrates. The glycoproteins may be modified with N- or O-linked carbohydrates, or glycosylphosphatidylinositol (GPI) anchors; the polysaccharides are primarily branched glucans, including beta-link…	PAU24(YBR301W);PLB2(YMR006C);YNL190W(YNL190W)
GO:0005618	3 of 35 (8.6%)	0.58	5.18	66 of 3988 (1.7%)	0.0194	0.952	cell wall	"The rigid or semi-rigid envelope lying outside the cell membrane of plant, fungal, and most prokaryotic cells, maintaining their shape and protecting them from osmotic lysis. In plants it is made of cellulose and, often, lignin; in fungi it is composed largely of polysaccharides; in bacteria it is composed of peptidoglycan." [ISBN:0198547684]	PAU24(YBR301W);PLB2(YMR006C);YNL190W(YNL190W)
GO:0030312	3 of 35 (8.6%)	0.58	5.18	66 of 3988 (1.7%)	0.0194	0.952	external encapsulating structure	"A structure that lies outside the plasma membrane and surrounds the entire cell." [GOC:go_curators]	PAU24(YBR301W);PLB2(YMR006C);YNL190W(YNL190W)
GO:0009331	1 of 35 (2.9%)	0.03	37.98	3 of 3988 (0.1%)	0.0261	1	glycerol-3-phosphate dehydrogenase complex	"An enzyme complex that catalyzes the dehydrogenation of sn-glycerol 3-phosphate to form glycerone phosphate." [EC:1.1.5.3]	GPD1(YDL022W)
GO:0044454	5 of 35 (14.3%)	1.75	2.86	199 of 3988 (5.0%)	0.0282	1	nuclear chromosome part	"Any constituent part of a nuclear chromosome, a chromosome found in the nucleus of a eukaryotic cell." [GOC:jl]	POL32(YJR043C);RAD5(YLR032W);RIF2(YLR453C);REV1(YOR346W);POL31(YJR006W)
GO:0043332	3 of 35 (8.6%)	0.68	4.44	77 of 3988 (1.9%)	0.0291	1	mating projection tip	"The apex of the mating projection in unicellular fungi exposed to mating pheromone; site of polarized growth." [GOC:mcc]	STE6(YKL209C);YMR295C(YMR295C);EXO70(YJL085W)
GO:0044463	3 of 35 (8.6%)	0.70	4.27	80 of 3988 (2.0%)	0.0321	1	cell projection part	"Any constituent part of a cell projection, a prolongation or process extending from a cell, e.g. a flagellum or axon." [GOC:jl]	STE6(YKL209C);YMR295C(YMR295C);EXO70(YJL085W)
GO:0000781	2 of 35 (5.7%)	0.29	6.91	33 of 3988 (0.8%)	0.0333	1	chromosome, telomeric region	"The terminal region of a linear chromosome that includes the telomeric DNA repeats and associated proteins." [GOC:elh]	RIF2(YLR453C);ELG1(YOR144C)
GO:0019774	1 of 35 (2.9%)	0.04	28.49	4 of 3988 (0.1%)	0.0347	1	proteasome core complex, beta-subunit complex	"The proteasome core subcomplex that constitutes the two inner rings of the proteasome core complex. An example of this component is found in Mus musculus." [GOC:jl, GOC:mtg_sensu, GOC:rb, PMID:10854779]	PUP3(YER094C)
GO:0043596	2 of 35 (5.7%)	0.31	6.51	35 of 3988 (0.9%)	0.0372	1	nuclear replication fork	"The Y-shaped region of a nuclear replicating DNA molecule, resulting from the separation of the DNA strands and in which the synthesis of new strands takes place. Also includes associated protein complexes." [GOC:jl, GOC:mtg_sensu]	POL32(YJR043C);POL31(YJR006W)
GO:0005937	3 of 35 (8.6%)	0.76	3.93	87 of 3988 (2.2%)	0.0397	1	mating projection	"The projection formed by unicellular fungi in response to mating pheromone." [GOC:mcc]	STE6(YKL209C);YMR295C(YMR295C);EXO70(YJL085W)
GO:0042995	3 of 35 (8.6%)	0.76	3.93	87 of 3988 (2.2%)	0.0397	1	cell projection	"A prolongation or process extending from a cell, e.g. a flagellum or axon." [GOC:jl, http://www.cogsci.princeton.edu/~wn/]	STE6(YKL209C);YMR295C(YMR295C);EXO70(YJL085W)
GO:0000228	5 of 35 (14.3%)	1.92	2.60	219 of 3988 (5.5%)	0.0403	1	nuclear chromosome	"A chromosome found in the nucleus of a eukaryotic cell." [GOC:mah]	POL32(YJR043C);RAD5(YLR032W);RIF2(YLR453C);REV1(YOR346W);POL31(YJR006W)
GO:0043232	12 of 35 (34.3%)	7.31	1.64	833 of 3988 (20.9%)	0.0457	1	intracellular non-membrane-bounded organelle	"Organized structure of distinctive morphology and function, not bounded by a lipid bilayer membrane and occurring within the cell. Includes ribosomes, the cytoskeleton and chromosomes." [GOC:go_curators]	LIN1(YHR156C);POL32(YJR043C);RAD27(YKL113C);RAD5(YLR032W);RIF2(YLR453C);YMR295C(YMR295C);ELG1(YOR144C);REV1(YOR346W);RFC5(YBR087W);YPP1(YGR198W);POL31(YJR006W);RFC4(YOL094C)
GO:0043228	12 of 35 (34.3%)	7.31	1.64	833 of 3988 (20.9%)	0.0457	1	non-membrane-bounded organelle	"Organized structure of distinctive morphology and function, not bounded by a lipid bilayer membrane. Includes ribosomes, the cytoskeleton and chromosomes." [GOC:go_curators]	LIN1(YHR156C);POL32(YJR043C);RAD27(YKL113C);RAD5(YLR032W);RIF2(YLR453C);YMR295C(YMR295C);ELG1(YOR144C);REV1(YOR346W);RFC5(YBR087W);YPP1(YGR198W);POL31(YJR006W);RFC4(YOL094C)

## Sheet: Randomization 6
BIOLOGICAL_PROCESS
GO_term	set	expected	enrichment	background	p_fisher(1side)	fdr	Name	Description
GO:0006272	4 of 34 (11.8%)	0.08	52.13	9 of 3988 (0.2%)	5.39e-07	0.00203	leading strand elongation	"The synthesis of DNA from a template strand in the 5' to 3' direction; leading strand elongation is continuous as it proceeds in the same direction as the replication fork." [ISBN:071673706X, ISBN:0815316194]	POL32(YJR043C);RFC5(YBR087W);POL31(YJR006W);RFC4(YOL094C)
GO:0006271	5 of 34 (14.7%)	0.20	24.44	24 of 3988 (0.6%)	1.26e-06	0.00203	DNA strand elongation involved in DNA replication	"The process in which a DNA strand is synthesized from template DNA during replication by the action of polymerases, which add nucleotides to the 3' end of the nascent DNA strand." [ISBN:071673706X, ISBN:0815316194]	POL32(YJR043C);RAD27(YKL113C);RFC5(YBR087W);POL31(YJR006W);RFC4(YOL094C)
GO:0022616	5 of 34 (14.7%)	0.21	23.46	25 of 3988 (0.6%)	1.56e-06	0.00203	DNA strand elongation	"The DNA metabolic process in which a DNA strand is synthesized by adding nucleotides to the 3' end of an existing DNA stand." [GOC:isa_complete]	POL32(YJR043C);RAD27(YKL113C);RFC5(YBR087W);POL31(YJR006W);RFC4(YOL094C)
GO:0006260	8 of 34 (23.5%)	0.98	8.16	115 of 3988 (2.9%)	3.64e-06	0.00354	DNA replication	"The cellular metabolic process in which a cell duplicates one or more molecules of DNA. DNA replication begins when specific sequences, known as origins of replication, are recognized and bound by initiation proteins, and ends when the original DNA molecule has been completely duplicated and the copies topologically separated. The unit of replication usually corresponds to the genome of the cell…	POL32(YJR043C);RAD27(YKL113C);RIF2(YLR453C);ELG1(YOR144C);REV1(YOR346W);RFC5(YBR087W);POL31(YJR006W);RFC4(YOL094C)
GO:0006298	4 of 34 (11.8%)	0.14	27.60	17 of 3988 (0.4%)	9.7e-06	0.00756	mismatch repair	"A system for the correction of errors in which an incorrect base, which cannot form hydrogen bonds with the corresponding base in the parent strand, is incorporated into the daughter strand. The mismatch repair system promotes genomic fidelity by repairing base-base mismatches, insertion-deletion loops and heterologies generated during DNA replication and recombination." [ISBN:0198506732, PMID:1…	POL32(YJR043C);RFC5(YBR087W);POL31(YJR006W);RFC4(YOL094C)
GO:0043137	3 of 34 (8.8%)	0.06	50.27	7 of 3988 (0.2%)	1.94e-05	0.0126	DNA replication, removal of RNA primer	"Removal of the Okazaki RNA primer from the lagging strand of replicating DNA, by a combination of the actions of DNA polymerase, DNA helicase and an endonuclease." [GOC:jl, PMID:12424238]	POL32(YJR043C);RAD27(YKL113C);POL31(YJR006W)
GO:0006281	9 of 34 (26.5%)	1.68	5.36	197 of 3988 (4.9%)	2.61e-05	0.0145	DNA repair	"The process of restoring DNA after damage. Genomes are subject to damage by chemical and physical agents in the environment (e.g. UV and ionizing radiations, chemical mutagens, fungal and bacterial toxins, etc.) and by free radicals or alkylating agents endogenously generated in metabolism. DNA is also damaged because of errors during its replication. A variety of different DNA repair pathways h…	POL32(YJR043C);RAD27(YKL113C);RAD5(YLR032W);PSO2(YMR137C);ELG1(YOR144C);REV1(YOR346W);RFC5(YBR087W);POL31(YJR006W);RFC4(YOL094C)
GO:0006301	4 of 34 (11.8%)	0.20	20.40	23 of 3988 (0.6%)	3.48e-05	0.017	postreplication repair	"The conversion of DNA-damage induced single-stranded gaps into large molecular weight DNA after replication. Includes pathways that remove replication-blocking lesions in conjunction with DNA replication." [GOC:elh]	POL32(YJR043C);RAD5(YLR032W);REV1(YOR346W);POL31(YJR006W)
GO:0033567	3 of 34 (8.8%)	0.08	39.10	9 of 3988 (0.2%)	4.59e-05	0.0199	DNA replication, Okazaki fragment processing	"The DNA metabolic process, occurring during lagging strand synthesis, by which RNA primers are removed from Okazaki fragments, the resulting gaps filled by DNA polymerization, and the ends ligated to form a continuous strand." [GOC:mah, ISBN:0716720094]	POL32(YJR043C);RAD27(YKL113C);POL31(YJR006W)
GO:0006261	6 of 34 (17.6%)	0.71	8.48	83 of 3988 (2.1%)	5.72e-05	0.0223	DNA-dependent DNA replication	"A DNA replication process that uses parental DNA as a template for the DNA-dependent DNA polymerases that synthesize the new strands." [GOC:mah, ISBN:0198506732]	POL32(YJR043C);RAD27(YKL113C);ELG1(YOR144C);RFC5(YBR087W);POL31(YJR006W);RFC4(YOL094C)
GO:0006974	9 of 34 (26.5%)	1.95	4.61	229 of 3988 (5.7%)	8.6e-05	0.0305	response to DNA damage stimulus	"Any process that results in a change in state or activity of a cell (in terms of movement, secretion, enzyme production, gene expression, etc.) as a result of a stimulus indicating damage to its DNA from environmental insults or errors during metabolism." [GOC:go_curators]	POL32(YJR043C);RAD27(YKL113C);RAD5(YLR032W);PSO2(YMR137C);ELG1(YOR144C);REV1(YOR346W);RFC5(YBR087W);POL31(YJR006W);RFC4(YOL094C)
GO:0033554	12 of 34 (35.3%)	3.62	3.31	425 of 3988 (10.7%)	0.000113	0.0366	cellular response to stress	"Any process that results in a change in state or activity of a cell (in terms of movement, secretion, enzyme production, gene expression, etc.) as a result of a stimulus indicating the organism is under stress. The stress is usually, but not necessarily, exogenous (e.g. temperature, humidity, ionizing radiation)." [GOC:mah]	GPD1(YDL022W);SKN7(YHR206W);POL32(YJR043C);RAD27(YKL113C);RAD5(YLR032W);PSO2(YMR137C);YNL190W(YNL190W);ELG1(YOR144C);REV1(YOR346W);RFC5(YBR087W);POL31(YJR006W);RFC4(YOL094C)
GO:0006273	3 of 34 (8.8%)	0.11	27.07	13 of 3988 (0.3%)	0.000153	0.0425	lagging strand elongation	"The synthesis of DNA from a template strand in a net 3' to 5' direction. Lagging strand DNA elongation proceeds by discontinuous synthesis of short stretches of DNA, known as Okazaki fragments, from RNA primers; these fragments are then joined by DNA ligase. Although each segment of nascent DNA is synthesized in the 5' to 3' direction, the overall direction of lagging strand synthesis is 3' to 5…	POL32(YJR043C);RAD27(YKL113C);POL31(YJR006W)
GO:0006284	3 of 34 (8.8%)	0.11	27.07	13 of 3988 (0.3%)	0.000153	0.0425	base-excision repair	"In base excision repair, an altered base is removed by a DNA glycosylase enzyme, followed by excision of the resulting sugar phosphate. The small gap left in the DNA helix is filled in by the sequential action of DNA polymerase and DNA ligase." [ISBN:0815316194]	POL32(YJR043C);RAD27(YKL113C);POL31(YJR006W)
GO:0071897	3 of 34 (8.8%)	0.13	23.46	15 of 3988 (0.4%)	0.00024	0.0624	DNA biosynthetic process	"The cellular DNA metabolic process resulting in the formation of DNA, deoxyribonucleic acid, one of the two main types of nucleic acid, consisting of a long unbranched macromolecule formed from one or two strands of linked deoxyribonucleotides, the 3'-phosphate group of each constituent deoxyribonucleotide being joined in 3',5'-phosphodiester linkage to the 5'-hydroxyl group of the deoxyribose m…	RAD27(YKL113C);RAD5(YLR032W);REV1(YOR346W)
GO:0006302	5 of 34 (14.7%)	0.62	8.03	73 of 3988 (1.8%)	0.000329	0.0769	double-strand break repair	"The repair of double-strand breaks in DNA via homologous and nonhomologous mechanisms to reform a continuous DNA helix." [GOC:elh]	POL32(YJR043C);RAD27(YKL113C);RAD5(YLR032W);PSO2(YMR137C);ELG1(YOR144C)
GO:0006950	13 of 34 (38.2%)	4.71	2.76	552 of 3988 (13.8%)	0.000339	0.0769	response to stress	"Any process that results in a change in state or activity of a cell or an organism (in terms of movement, secretion, enzyme production, gene expression, etc.) as a result of a disturbance in organismal or cellular homeostasis, usually, but not necessarily, exogenous (e.g. temperature, humidity, ionizing radiation)." [GOC:mah]	PAU24(YBR301W);GPD1(YDL022W);SKN7(YHR206W);POL32(YJR043C);RAD27(YKL113C);RAD5(YLR032W);PSO2(YMR137C);YNL190W(YNL190W);ELG1(YOR144C);REV1(YOR346W);RFC5(YBR087W);POL31(YJR006W);RFC4(YOL094C)
GO:0006278	3 of 34 (8.8%)	0.14	20.70	17 of 3988 (0.4%)	0.000355	0.0769	RNA-dependent DNA replication	"A DNA replication process that uses RNA as a template for RNA-dependent DNA polymerases (e.g. reverse transcriptase) that synthesize the new strands." [GOC:mah, ISBN:0198506732]	POL32(YJR043C);RIF2(YLR453C);POL31(YJR006W)
GO:0006259	10 of 34 (29.4%)	2.92	3.42	343 of 3988 (8.6%)	0.00039	0.0799	DNA metabolic process	"Any cellular metabolic process involving deoxyribonucleic acid. This is one of the two main types of nucleic acid, consisting of a long, unbranched macromolecule formed from one, or more commonly, two, strands of linked deoxyribonucleotides." [ISBN:0198506732]	POL32(YJR043C);RAD27(YKL113C);RAD5(YLR032W);RIF2(YLR453C);PSO2(YMR137C);ELG1(YOR144C);REV1(YOR346W);RFC5(YBR087W);POL31(YJR006W);RFC4(YOL094C)
GO:0051716	13 of 34 (38.2%)	5.56	2.34	652 of 3988 (16.3%)	0.00173	0.332	cellular response to stimulus	"Any process that results in a change in state or activity of a cell (in terms of movement, secretion, enzyme production, gene expression, etc.) as a result of a stimulus. The process begins with detection of the stimulus by a cell and ends with a change in state or activity or the cell." [GOC:bf, GOC:jl]	GPD1(YDL022W);SKN7(YHR206W);POL32(YJR043C);RAD27(YKL113C);RAD5(YLR032W);PSO2(YMR137C);YNL190W(YNL190W);ELG1(YOR144C);REV1(YOR346W);RFC5(YBR087W);EXO70(YJL085W);POL31(YJR006W);RFC4(YOL094C)
GO:0050896	15 of 34 (44.1%)	7.08	2.12	830 of 3988 (20.8%)	0.00179	0.332	response to stimulus	"Any process that results in a change in state or activity of a cell or an organism (in terms of movement, secretion, enzyme production, gene expression, etc.) as a result of a stimulus. The process begins with detection of the stimulus and ends with a change in state or activity or the cell or organism." [GOC:ai, GOC:bf]	PAU24(YBR301W);GPD1(YDL022W);SKN7(YHR206W);POL32(YJR043C);RAD27(YKL113C);STE6(YKL209C);RAD5(YLR032W);PSO2(YMR137C);YNL190W(YNL190W);ELG1(YOR144C);REV1(YOR346W);RFC5(YBR087W);EXO70(YJL085W);POL31(YJR006W);RFC4(YOL094C)
GO:0042276	2 of 34 (5.9%)	0.09	23.46	10 of 3988 (0.3%)	0.00304	0.539	error-prone translesion synthesis	"The conversion of DNA-damage induced single-stranded gaps into large molecular weight DNA after replication by using a specialized DNA polymerase or replication complex to insert a defined nucleotide across the lesion. This process does not remove the replication-blocking lesions and causes an increase in the endogenous mutation level. For example, in E. coli, a low fidelity DNA polymerase, pol …	RAD5(YLR032W);REV1(YOR346W)
GO:0065008	8 of 34 (23.5%)	2.58	3.10	303 of 3988 (7.6%)	0.0032	0.542	regulation of biological quality	"Any process that modulates a qualitative or quantitative trait of a biological quality. A biological quality is a measurable attribute of an organism or part of an organism, such as size, mass, shape, color, etc." [GOC:dph, GOC:isa_complete, GOC:mah, GOC:pr, GOC:vw]	GPD1(YDL022W);SKN7(YHR206W);MNR2(YKL064W);STE6(YKL209C);RAD5(YLR032W);RIF2(YLR453C);ELG1(YOR144C);FSF1(YOR271C)
GO:0019985	2 of 34 (5.9%)	0.10	19.55	12 of 3988 (0.3%)	0.00441	0.717	translesion synthesis	"The replication of damaged DNA by synthesis across a lesion in the template strand; a specialized DNA polymerase or replication complex inserts a defined nucleotide across from the lesion which allows DNA synthesis to continue beyond the lesion. This process can be mutagenic depending on the damaged nucleotide and the inserted nucleotide." [GOC:elh, PMID:10535901]	RAD5(YLR032W);REV1(YOR346W)
GO:0042592	6 of 34 (17.6%)	1.62	3.70	190 of 3988 (4.8%)	0.00475	0.725	homeostatic process	"Any biological process involved in the maintenance of an internal steady state." [GOC:jl, ISBN:0395825172]	GPD1(YDL022W);MNR2(YKL064W);RAD5(YLR032W);RIF2(YLR453C);ELG1(YOR144C);FSF1(YOR271C)
GO:0007062	3 of 34 (8.8%)	0.35	8.58	41 of 3988 (1.0%)	0.00484	0.725	sister chromatid cohesion	"The cell cycle process in which the sister chromatids of a replicated chromosome are joined along the entire length of the chromosome." [GOC:mah, ISBN:0815316194]	ELG1(YOR144C);RFC5(YBR087W);RFC4(YOL094C)
GO:0006973	1 of 34 (2.9%)	0.01	117.29	1 of 3988 (0.0%)	0.00853	0.852	intracellular accumulation of glycerol	"The accumulation of glycerol within a cell, for example by increased glycerol biosynthesis combined with decreased permeability of the cell membrane to glycerol, in response to the detection of a hyperosmotic environment." [GOC:jl, PMID:11752666]	GPD1(YDL022W)
GO:0010961	1 of 34 (2.9%)	0.01	117.29	1 of 3988 (0.0%)	0.00853	0.852	cellular magnesium ion homeostasis	"Any process involved in the maintenance of an internal steady state of magnesium ions at the level of a cell." [GOC:dph, GOC:tb]	MNR2(YKL064W)
GO:0010960	1 of 34 (2.9%)	0.01	117.29	1 of 3988 (0.0%)	0.00853	0.852	magnesium ion homeostasis	"Any process involved in the maintenance of an internal steady state of magnesium ions within an organism or cell." [GOC:dph, GOC:tb]	MNR2(YKL064W)
GO:0006286	1 of 34 (2.9%)	0.01	117.29	1 of 3988 (0.0%)	0.00853	0.852	base-excision repair, base-free sugar-phosphate removal	"Excision of the sugar phosphate residue at an AP site, i.e. a deoxyribose sugar with a missing base, by a phosphodiesterase enzyme." [ISBN:0815316194]	RAD27(YKL113C)
GO:0000770	1 of 34 (2.9%)	0.01	117.29	1 of 3988 (0.0%)	0.00853	0.852	peptide pheromone export	"The directed movement of a peptide pheromone out of a cell by a secretion or export pathway used solely for the export of peptide pheromones." [GOC:elh]	STE6(YKL209C)
GO:0030072	1 of 34 (2.9%)	0.01	117.29	1 of 3988 (0.0%)	0.00853	0.852	peptide hormone secretion	"The regulated release of a peptide hormone from a cell or organ." [GOC:mah]	STE6(YKL209C)
GO:0002790	1 of 34 (2.9%)	0.01	117.29	1 of 3988 (0.0%)	0.00853	0.852	peptide secretion	"The controlled release of a peptide from a cell or group of cells." [GOC:add]	STE6(YKL209C)
GO:0046879	1 of 34 (2.9%)	0.01	117.29	1 of 3988 (0.0%)	0.00853	0.852	hormone secretion	"The regulated release of hormones, substances with a specific regulatory effect on a particular organ or group of cells." [ISBN:0198506732]	STE6(YKL209C)
GO:0009914	1 of 34 (2.9%)	0.01	117.29	1 of 3988 (0.0%)	0.00853	0.852	hormone transport	"The directed movement of hormones into, out of or within a cell, or between cells, by means of some agent such as a transporter or pore." [GOC:tb]	STE6(YKL209C)
GO:0023061	1 of 34 (2.9%)	0.01	117.29	1 of 3988 (0.0%)	0.00853	0.852	signal release	"The process in which a signal is secreted or discharged into the extracellular medium from a cellular source." [GOC:mtg_signal]	STE6(YKL209C)
GO:0010817	1 of 34 (2.9%)	0.01	117.29	1 of 3988 (0.0%)	0.00853	0.852	regulation of hormone levels	"Any process that modulates the levels of hormone within an organism or a tissue. A hormone is any substance formed in very small amounts in one specialized organ or group of cells and carried (sometimes in the bloodstream) to another organ or group of cells in the same organism, upon which it has a specific regulatory action." [GOC:BHF, GOC:dph, GOC:tb]	STE6(YKL209C)
GO:0003001	1 of 34 (2.9%)	0.01	117.29	1 of 3988 (0.0%)	0.00853	0.852	generation of a signal involved in cell-cell signaling	"The cellular process that creates a physical entity or change in state, i.e. a signal, that originates in one cell and is used to transfer information to another cell. This process begins with the initial formation of the signal and ends with the mature form and placement of the signal." [GOC:dph]	STE6(YKL209C)
GO:0007267	1 of 34 (2.9%)	0.01	117.29	1 of 3988 (0.0%)	0.00853	0.852	cell-cell signaling	"Any process that mediates the transfer of information from one cell to another." [GOC:mah]	STE6(YKL209C)
GO:0046168	1 of 34 (2.9%)	0.02	58.65	2 of 3988 (0.1%)	0.017	1	glycerol-3-phosphate catabolic process	"The chemical reactions and pathways resulting in the breakdown of glycerol-3-phosphate, a phosphoric monoester of glycerol." [GOC:ai]	GPD1(YDL022W)
GO:0034553	1 of 34 (2.9%)	0.02	58.65	2 of 3988 (0.1%)	0.017	1	mitochondrial respiratory chain complex II assembly	"The aggregation, arrangement and bonding together of a set of components to form respiratory chain complex II, in the mitochondrial inner membrane." [GOC:dgf]	YDR379C-A(YDR379C-A)
GO:0034552	1 of 34 (2.9%)	0.02	58.65	2 of 3988 (0.1%)	0.017	1	respiratory chain complex II assembly	"The aggregation, arrangement and bonding together of a set of components to form respiratory chain complex II." [GOC:dgf]	YDR379C-A(YDR379C-A)
GO:0097032	1 of 34 (2.9%)	0.02	58.65	2 of 3988 (0.1%)	0.017	1	mitochondrial respiratory chain complex II biogenesis	"The biogenesis of a mitochondrial respiratory chain complex II, a protein complex located in the mitochondrial inner membrane that forms part of the mitochondrial respiratory chain. Includes the synthesis of constituent proteins and their aggregation, arrangement and bonding together." [GOC:pr]	YDR379C-A(YDR379C-A)
GO:0000734	1 of 34 (2.9%)	0.02	58.65	2 of 3988 (0.1%)	0.017	1	gene conversion at mating-type locus, DNA repair synthesis	"Synthesis of DNA that proceeds from the broken 3' single-strand DNA end uses the homologous intact duplex as the template during gene conversion at the mating-type locus." [GOC:elh]	RAD27(YKL113C)
GO:0042631	1 of 34 (2.9%)	0.02	58.65	2 of 3988 (0.1%)	0.017	1	cellular response to water deprivation	"Any process that results in a change in state or activity of a cell (in terms of movement, secretion, enzyme production, gene expression, etc.) as a result of deprivation of water." [GOC:go_curators]	YNL190W(YNL190W)
GO:0009414	1 of 34 (2.9%)	0.02	58.65	2 of 3988 (0.1%)	0.017	1	response to water deprivation	"Any process that results in a change in state or activity of a cell or an organism (in terms of movement, secretion, enzyme production, gene expression, etc.) as a result of a water deprivation stimulus, prolonged deprivation of water." [GOC:lr]	YNL190W(YNL190W)
GO:0006072	1 of 34 (2.9%)	0.03	39.10	3 of 3988 (0.1%)	0.0254	1	glycerol-3-phosphate metabolic process	"The chemical reactions and pathways involving glycerol-3-phosphate, a phosphoric monoester of glycerol." [GOC:go_curators, ISBN:0198506732]	GPD1(YDL022W)
GO:0000304	1 of 34 (2.9%)	0.03	39.10	3 of 3988 (0.1%)	0.0254	1	response to singlet oxygen	"Any process that results in a change in state or activity of a cell or an organism (in terms of movement, secretion, enzyme production, gene expression, etc.) as a result of a singlet oxygen stimulus. Singlet oxygen is a dioxygen (O2) molecule in which two 2p electrons have similar spin. Singlet oxygen is more highly reactive than the form in which these electrons are of opposite spin, and it is…	SKN7(YHR206W)
GO:0010994	1 of 34 (2.9%)	0.03	39.10	3 of 3988 (0.1%)	0.0254	1	free ubiquitin chain polymerization	"The process of creating free ubiquitin chains, compounds composed of a large number of ubiquitin monomers. These chains are not conjugated to a protein." [GOC:BHF, GOC:dph, GOC:tb]	RAD5(YLR032W)
GO:0051436	1 of 34 (2.9%)	0.03	39.10	3 of 3988 (0.1%)	0.0254	1	negative regulation of ubiquitin-protein ligase activity involved in mitotic cell cycle	"Any process that stops, prevents, or reduces the frequency, rate or extent of ubiquitin ligase activity that contributes to the mitotic cell cycle." [GOC:ai, GOC:tb]	ACM1(YPL267W)
GO:0071214	2 of 34 (5.9%)	0.28	7.11	33 of 3988 (0.8%)	0.0316	1	cellular response to abiotic stimulus	"Any process that results in a change in state or activity of a cell (in terms of movement, secretion, enzyme production, gene expression, etc.) as a result of an abiotic (non-living) stimulus." [GOC:mah]	GPD1(YDL022W);YNL190W(YNL190W)
GO:0006401	3 of 34 (8.8%)	0.70	4.29	82 of 3988 (2.1%)	0.0317	1	RNA catabolic process	"The chemical reactions and pathways resulting in the breakdown of RNA, ribonucleic acid, one of the two main type of nucleic acid, consisting of a long, unbranched macromolecule formed from ribonucleotides joined in 3',5'-phosphodiester linkage." [ISBN:0198506732]	POL32(YJR043C);RAD27(YKL113C);POL31(YJR006W)
GO:0000731	1 of 34 (2.9%)	0.03	29.32	4 of 3988 (0.1%)	0.0337	1	DNA synthesis involved in DNA repair	"Synthesis of DNA that proceeds from the broken 3' single-strand DNA end uses the homologous intact duplex as the template." [PMID:10357855]	RAD27(YKL113C)
GO:0010993	1 of 34 (2.9%)	0.03	29.32	4 of 3988 (0.1%)	0.0337	1	regulation of ubiquitin homeostasis	"Any process that modulates the rate, frequency, or extent of ubiquitin homeostasis. Ubiquitin homeostasis is any process involved in the maintenance of an internal steady state of ubiquitin monomers and free ubiquitin chains at the level of the cell." [GOC:BHF, GOC:dph, GOC:tb]	RAD5(YLR032W)
GO:0010992	1 of 34 (2.9%)	0.03	29.32	4 of 3988 (0.1%)	0.0337	1	ubiquitin homeostasis	"Any process involved in the maintenance of an internal steady state of ubiquitin monomers and free ubiquitin chains at the level of the cell." [GOC:BHF, GOC:dph, GOC:tb]	RAD5(YLR032W)
GO:0071462	1 of 34 (2.9%)	0.03	29.32	4 of 3988 (0.1%)	0.0337	1	cellular response to water stimulus	"Any process that results in a change in state or activity of a cell (in terms of movement, secretion, enzyme production, gene expression, etc.) as a result of a stimulus reflecting the presence, absence, or concentration of water." [GOC:mah]	YNL190W(YNL190W)
GO:0009415	1 of 34 (2.9%)	0.03	29.32	4 of 3988 (0.1%)	0.0337	1	response to water stimulus	"Any process that results in a change in state or activity of a cell or an organism (in terms of movement, secretion, enzyme production, gene expression, etc.) as a result of a stimulus reflecting the presence, absence, or concentration of water." [GOC:jl]	YNL190W(YNL190W)
GO:0051444	1 of 34 (2.9%)	0.03	29.32	4 of 3988 (0.1%)	0.0337	1	negative regulation of ubiquitin-protein ligase activity	"Any process that stops, prevents, or reduces the frequency, rate or extent of ubiquitin ligase activity, the catalysis of the reaction: ATP + ubiquitin + protein lysine = AMP + diphosphate + protein N-ubiquityllysine." [EC:6.3.2.19, GOC:ai, GOC:tb]	ACM1(YPL267W)
GO:0031397	1 of 34 (2.9%)	0.03	29.32	4 of 3988 (0.1%)	0.0337	1	negative regulation of protein ubiquitination	"Any process that stops, prevents, or reduces the frequency, rate or extent of the addition of ubiquitin groups to a protein." [GOC:mah]	ACM1(YPL267W)
GO:0051352	1 of 34 (2.9%)	0.03	29.32	4 of 3988 (0.1%)	0.0337	1	negative regulation of ligase activity	"Any process that stops or reduces the rate of ligase activity, the catalysis of the ligation of two substances with concomitant breaking of a diphosphate linkage, usually in a nucleoside triphosphate." [GOC:ai]	ACM1(YPL267W)
GO:0001927	1 of 34 (2.9%)	0.03	29.32	4 of 3988 (0.1%)	0.0337	1	exocyst assembly	"The aggregation, arrangement and bonding together of various polypeptides into the exocyst complex." [GOC:hjd, PMID:9700152, Wikipedia:Exocyst]	EXO70(YJL085W)
GO:0016567	3 of 34 (8.8%)	0.74	4.04	87 of 3988 (2.2%)	0.0369	1	protein ubiquitination	"The process in which one or more ubiquitin groups are added to a protein." [GOC:ai]	DAS1(YJL149W);RAD5(YLR032W);ACM1(YPL267W)
GO:0000724	2 of 34 (5.9%)	0.32	6.34	37 of 3988 (0.9%)	0.039	1	double-strand break repair via homologous recombination	"The error-free repair of a double-strand break in DNA in which the broken DNA molecule is repaired using homologous sequences. A strand in the broken DNA searches for a homologous region in an intact chromosome to serve as the template for DNA synthesis. The restoration of two intact DNA molecules results in the exchange, reciprocal or nonreciprocal, of genetic material between the intact DNA mo…	POL32(YJR043C);ELG1(YOR144C)
GO:0006289	2 of 34 (5.9%)	0.32	6.17	38 of 3988 (1.0%)	0.041	1	nucleotide-excision repair	"A DNA repair process in which a small region of the strand surrounding the damage is removed from the DNA helix as an oligonucleotide. The small gap left in the DNA helix is filled in by the sequential action of DNA polymerase and DNA ligase. Nucleotide excision repair recognizes a wide range of substrates, including damage caused by UV irradiation (pyrimidine dimers and 6-4 photoproducts) and c…	POL32(YJR043C);POL31(YJR006W)
GO:0000160	1 of 34 (2.9%)	0.04	23.46	5 of 3988 (0.1%)	0.0419	1	phosphorelay signal transduction system	"A conserved series of molecular signals found in prokaryotes and eukaryotes; involves autophosphorylation of a histidine kinase and the transfer of the phosphate group to an aspartate that then acts as a phospho-donor to response regulator proteins." [PMID:9191038]	SKN7(YHR206W)
GO:0043619	1 of 34 (2.9%)	0.04	23.46	5 of 3988 (0.1%)	0.0419	1	regulation of transcription from RNA polymerase II promoter in response to oxidative stress	"Modulation of the frequency, rate or extent of transcription from an RNA polymerase II promoter as a result of a stimulus indicating the organism is under oxidative stress, a state often resulting from exposure to high levels of reactive oxygen species, e.g. superoxide anions, hydrogen peroxide (H2O2), and hydroxyl radicals." [GOC:jl]	SKN7(YHR206W)
GO:0051439	1 of 34 (2.9%)	0.04	23.46	5 of 3988 (0.1%)	0.0419	1	regulation of ubiquitin-protein ligase activity involved in mitotic cell cycle	"A cell cycle process that modulates the frequency, rate or extent of ubiquitin ligase activity that contributes to the mitotic cell cycle." [GOC:ai]	ACM1(YPL267W)
GO:0051601	1 of 34 (2.9%)	0.04	23.46	5 of 3988 (0.1%)	0.0419	1	exocyst localization	"Any process in which an exocyst is transported to, or maintained in, a specific location. An exocyst is a protein complex peripherally associated with the plasma membrane that determines where vesicles dock and fuse." [GOC:ai]	EXO70(YJL085W)
GO:1901700	2 of 34 (5.9%)	0.33	6.02	39 of 3988 (1.0%)	0.0429	1	response to oxygen-containing compound	"Any process that results in a change in state or activity of a cell or an organism (in terms of movement, secretion, enzyme production, gene expression, etc.) as a result of an oxygen-containing compound stimulus." [GOC:pr, GOC:TermGenie]	SKN7(YHR206W);YNL190W(YNL190W)
GO:0046903	2 of 34 (5.9%)	0.34	5.86	40 of 3988 (1.0%)	0.045	1	secretion	"The controlled release of a substance by a cell, a group of cells, or a tissue." [GOC:ai]	STE6(YKL209C);EXO70(YJL085W)
GO:0032940	2 of 34 (5.9%)	0.34	5.86	40 of 3988 (1.0%)	0.045	1	secretion by cell	"The controlled release of a substance by a cell." [GOC:mah]	STE6(YKL209C);EXO70(YJL085W)
Depleted
GO:0010467	4 of 34 (11.8%)	9.28	0.43	1088 of 3988 (27.3%)	0.0258	1	gene expression	"The process in which a gene's sequence is converted into a mature gene product or products (proteins or RNA). This includes the production of an RNA transcript as well as any processing to produce a mature RNA product or an mRNA (for protein-coding genes) and the translation of that mRNA into protein. Some protein processing events may be included when they are required to form an active form of…	TBS1(YBR150C);SKN7(YHR206W);ACM1(YPL267W);RPC37(YKR025W)
GO:0044710	3 of 34 (8.8%)	7.57	0.40	888 of 3988 (22.3%)	0.0371	1	single-organism metabolic process	"A metabolic process - chemical reactions and pathways, including anabolism and catabolism, by which living organisms transform chemical substances - which involves a single organism." [GOC:jl]	GPD1(YDL022W);STE6(YKL209C);PLB2(YMR006C)
GO:0006396	0 of 34 (0.0%)	3.02	0.00	354 of 3988 (8.9%)	0.0418	1	RNA processing	"Any process involved in the conversion of one or more primary RNA transcripts into one or more mature RNA molecules." [GOC:mah]
GO:0019538	4 of 34 (11.8%)	8.62	0.46	1011 of 3988 (25.4%)	0.0441	1	protein metabolic process	"The chemical reactions and pathways involving a specific protein, rather than of proteins in general. Includes protein modification." [GOC:ma]	DAS1(YJL149W);RAD5(YLR032W);ACM1(YPL267W);PUP3(YER094C)
MOLECULAR_FUNCTION
GO_term	set	expected	enrichment	background	p_fisher(1side)	fdr	Name	Description
GO:0004527	4 of 34 (11.8%)	0.22	18.05	26 of 3988 (0.7%)	5.77e-05	0.109	exonuclease activity	"Catalysis of the hydrolysis of ester linkages within nucleic acids by removing nucleotide residues from the 3' or 5' end." [GOC:mah, ISBN:0198547684]	POL32(YJR043C);RAD27(YKL113C);PSO2(YMR137C);POL31(YJR006W)
GO:0003887	3 of 34 (8.8%)	0.13	23.46	15 of 3988 (0.4%)	0.00024	0.113	DNA-directed DNA polymerase activity	"Catalysis of the reaction: deoxynucleoside triphosphate + DNA(n) = diphosphate + DNA(n+1); the synthesis of DNA from deoxyribonucleotide triphosphates in the presence of a DNA template and primer." [EC:2.7.7.7, ISBN:0198547684]	POL32(YJR043C);REV1(YOR346W);POL31(YJR006W)
GO:0034061	3 of 34 (8.8%)	0.13	23.46	15 of 3988 (0.4%)	0.00024	0.113	DNA polymerase activity	"Catalysis of the reaction: deoxynucleoside triphosphate + DNA(n) = diphosphate + DNA(n+1); the synthesis of DNA from deoxyribonucleotide triphosphates in the presence of a nucleic acid template and primer." [EC:2.7.7.7, GOC:mah]	POL32(YJR043C);REV1(YOR346W);POL31(YJR006W)
GO:0008310	2 of 34 (5.9%)	0.03	58.65	4 of 3988 (0.1%)	0.000419	0.113	single-stranded DNA specific 3'-5' exodeoxyribonuclease activity	"Catalysis of the sequential cleavage of mononucleotides from a free 3' terminus of a single-stranded DNA molecule." [GOC:mah]	POL32(YJR043C);POL31(YJR006W)
GO:0008297	2 of 34 (5.9%)	0.03	58.65	4 of 3988 (0.1%)	0.000419	0.113	single-stranded DNA specific exodeoxyribonuclease activity	"Catalysis of the sequential cleavage of mononucleotides from a free 5' or 3' terminus of a single-stranded DNA molecule." [GOC:mah]	POL32(YJR043C);POL31(YJR006W)
GO:0003689	2 of 34 (5.9%)	0.03	58.65	4 of 3988 (0.1%)	0.000419	0.113	DNA clamp loader activity	"Catalysis of the reaction: ATP + H2O = ADP + phosphate, to drive the opening of the ring structure of the PCNA complex, or any of the related sliding clamp complexes, and their closing around the DNA duplex." [GOC:mah, GOC:vw, PMID:16082778]	RFC5(YBR087W);RFC4(YOL094C)
GO:0033170	2 of 34 (5.9%)	0.03	58.65	4 of 3988 (0.1%)	0.000419	0.113	protein-DNA loading ATPase activity	"Catalysis of the reaction: ATP + H2O = ADP + phosphate, to drive the assembly of a protein or protein complex onto a DNA molecule." [GOC:mah, GOC:vw]	RFC5(YBR087W);RFC4(YOL094C)
GO:0008409	2 of 34 (5.9%)	0.04	46.92	5 of 3988 (0.1%)	0.000694	0.161	5'-3' exonuclease activity	"Catalysis of the hydrolysis of ester linkages within nucleic acids by removing nucleotide residues from the 5' end." [GOC:ai]	RAD27(YKL113C);PSO2(YMR137C)
GO:0016779	4 of 34 (11.8%)	0.43	9.38	50 of 3988 (1.3%)	0.000769	0.161	nucleotidyltransferase activity	"Catalysis of the transfer of a nucleotidyl group to a reactant." [ISBN:0198506732]	POL32(YJR043C);REV1(YOR346W);POL31(YJR006W);RPC37(YKR025W)
GO:0003677	10 of 34 (29.4%)	3.23	3.09	379 of 3988 (9.5%)	0.000867	0.163	DNA binding	"Any molecular function by which a gene product interacts selectively and non-covalently with DNA (deoxyribonucleic acid)." [GOC:dph, GOC:jl, GOC:tb, GOC:vw]	TBS1(YBR150C);SKN7(YHR206W);RAD27(YKL113C);RAD5(YLR032W);RIF2(YLR453C);PSO2(YMR137C);REV1(YOR346W);RFC5(YBR087W);POL31(YJR006W);RFC4(YOL094C)
GO:0008296	2 of 34 (5.9%)	0.05	39.10	6 of 3988 (0.2%)	0.00104	0.177	3'-5'-exodeoxyribonuclease activity	"Catalysis of the sequential cleavage of mononucleotides from a free 3' terminus of a DNA molecule." [GOC:mah]	POL32(YJR043C);POL31(YJR006W)
GO:0004536	3 of 34 (8.8%)	0.22	13.53	26 of 3988 (0.7%)	0.00129	0.202	deoxyribonuclease activity	"Catalysis of the hydrolysis of ester linkages within deoxyribonucleic acid." [GOC:mah, ISBN:0198547684]	POL32(YJR043C);RAD27(YKL113C);POL31(YJR006W)
GO:0016895	2 of 34 (5.9%)	0.06	33.51	7 of 3988 (0.2%)	0.00144	0.209	exodeoxyribonuclease activity, producing 5'-phosphomonoesters	"Catalysis of the hydrolysis of ester linkages within deoxyribonucleic acids by removing nucleotide residues from the 3' or 5' end to yield 5' phosphomonoesters." [GOC:ai]	POL32(YJR043C);POL31(YJR006W)
GO:0004529	2 of 34 (5.9%)	0.07	29.32	8 of 3988 (0.2%)	0.00191	0.257	exodeoxyribonuclease activity	"Catalysis of the sequential cleavage of mononucleotides from a free 5' or 3' terminus of a DNA molecule." [GOC:mah, ISBN:0198547684]	POL32(YJR043C);POL31(YJR006W)
GO:0004518	4 of 34 (11.8%)	0.59	6.80	69 of 3988 (1.7%)	0.00257	0.323	nuclease activity	"Catalysis of the hydrolysis of ester linkages within nucleic acids." [ISBN:0198547684]	POL32(YJR043C);RAD27(YKL113C);PSO2(YMR137C);POL31(YJR006W)
GO:0008094	3 of 34 (8.8%)	0.39	7.65	46 of 3988 (1.2%)	0.00669	0.729	DNA-dependent ATPase activity	"Catalysis of the reaction: ATP + H2O = ADP + phosphate; this reaction requires the presence of single- or double-stranded DNA, and it drives another reaction." [EC:3.6.1.3, GOC:jl]	RAD5(YLR032W);RFC5(YBR087W);RFC4(YOL094C)
GO:0008408	2 of 34 (5.9%)	0.14	14.66	16 of 3988 (0.4%)	0.00786	0.729	3'-5' exonuclease activity	"Catalysis of the hydrolysis of ester linkages within nucleic acids by removing nucleotide residues from the 3' end." [GOC:ai]	POL32(YJR043C);POL31(YJR006W)
GO:0016796	2 of 34 (5.9%)	0.14	14.66	16 of 3988 (0.4%)	0.00786	0.729	exonuclease activity, active with either ribo- or deoxyribonucleic acids and producing 5'-phosphomonoesters	"Catalysis of the hydrolysis of ester linkages within nucleic acids by removing nucleotide residues from the 3' or 5' end to yield 5' phosphomonoesters." [GOC:mah]	POL32(YJR043C);POL31(YJR006W)
GO:0017125	1 of 34 (2.9%)	0.01	117.29	1 of 3988 (0.0%)	0.00853	0.729	deoxycytidyl transferase activity	"Catalysis of the insertion of a dCMP residue opposite a template abasic site in DNA." [PMID:10535901]	REV1(YOR346W)
GO:0055105	1 of 34 (2.9%)	0.01	117.29	1 of 3988 (0.0%)	0.00853	0.729	ubiquitin-protein ligase inhibitor activity	"Stops, prevents or reduces the activity of a ubiquitin-protein ligase." [GOC:BHF, GOC:rl]	ACM1(YPL267W)
GO:0055104	1 of 34 (2.9%)	0.01	117.29	1 of 3988 (0.0%)	0.00853	0.729	ligase inhibitor activity	"Stops, prevents or reduces the activity of a ligase." [GOC:BHF, GOC:rl]	ACM1(YPL267W)
GO:0061133	1 of 34 (2.9%)	0.01	117.29	1 of 3988 (0.0%)	0.00853	0.729	endopeptidase activator activity	"Increases the activity of an endopeptidase, any enzyme that hydrolyzes nonterminal peptide bonds in polypeptides." [GOC:dph, GOC:tb]	PUP3(YER094C)
GO:0003684	2 of 34 (5.9%)	0.19	10.66	22 of 3988 (0.6%)	0.0146	1	damaged DNA binding	"Interacting selectively and non-covalently with damaged DNA." [GOC:jl]	PSO2(YMR137C);REV1(YOR346W)
GO:0004367	1 of 34 (2.9%)	0.02	58.65	2 of 3988 (0.1%)	0.017	1	glycerol-3-phosphate dehydrogenase [NAD+] activity	"Catalysis of the reaction: sn-glycerol 3-phosphate + NAD+ = glycerone phosphate + NADH + H+." [EC:1.1.1.8]	GPD1(YDL022W)
GO:0004622	1 of 34 (2.9%)	0.02	58.65	2 of 3988 (0.1%)	0.017	1	lysophospholipase activity	"Catalysis of the reaction: 2-lysophosphatidylcholine + H2O = glycerophosphocholine + a carboxylate." [EC:3.1.1.5]	PLB2(YMR006C)
GO:0016504	1 of 34 (2.9%)	0.02	58.65	2 of 3988 (0.1%)	0.017	1	peptidase activator activity	"Increases the activity of a peptidase, any enzyme that catalyzes the hydrolysis peptide bonds." [GOC:ai]	PUP3(YER094C)
GO:0017049	1 of 34 (2.9%)	0.02	58.65	2 of 3988 (0.1%)	0.017	1	GTP-Rho binding	"Interacting selectively and non-covalently with the GTP-bound form of the Rho protein." [GOC:mah]	EXO70(YJL085W)
GO:0042623	4 of 34 (11.8%)	1.10	3.64	129 of 3988 (3.2%)	0.0229	1	ATPase activity, coupled	"Catalysis of the reaction: ATP + H2O = ADP + phosphate; this reaction directly drives some other reaction, for example ion transport across a membrane." [EC:3.6.1.3, GOC:jl]	STE6(YKL209C);RAD5(YLR032W);RFC5(YBR087W);RFC4(YOL094C)
GO:0003676	11 of 34 (32.4%)	5.92	1.86	694 of 3988 (17.4%)	0.0246	1	nucleic acid binding	"Interacting selectively and non-covalently with any nucleic acid." [GOC:jl]	TBS1(YBR150C);YGR001C(YGR001C);SKN7(YHR206W);RAD27(YKL113C);RAD5(YLR032W);RIF2(YLR453C);PSO2(YMR137C);REV1(YOR346W);RFC5(YBR087W);POL31(YJR006W);RFC4(YOL094C)
GO:0015095	1 of 34 (2.9%)	0.03	39.10	3 of 3988 (0.1%)	0.0254	1	magnesium ion transmembrane transporter activity	"Catalysis of the transfer of magnesium (Mg) ions from one side of a membrane to the other." [GOC:dgf]	MNR2(YKL064W)
GO:0015440	1 of 34 (2.9%)	0.03	39.10	3 of 3988 (0.1%)	0.0254	1	peptide-transporting ATPase activity	"Catalysis of the reaction: ATP + H2O + peptide(in) = ADP + phosphate + peptide(out). Peptides exported include alpha-hemolysin, cyclolysin, colicin V and siderophores from Gram-negative bacteria, and bacteriocin, subtilin, competence factor and pediocin from Gram-positive bacteria." [EC:3.6.3.43]	STE6(YKL209C)
GO:0009378	1 of 34 (2.9%)	0.03	39.10	3 of 3988 (0.1%)	0.0254	1	four-way junction helicase activity	"Catalysis of the unwinding of the DNA helix of DNA containing four-way junctions, including Holliday junctions." [GOC:jl, PMID:9442895]	RAD5(YLR032W)
GO:0000403	1 of 34 (2.9%)	0.03	39.10	3 of 3988 (0.1%)	0.0254	1	Y-form DNA binding	"Interacting selectively and non-covalently with segment of DNA shaped like a Y. This shape occurs when DNA contains a region of paired double-stranded DNA on one end and a region of unpaired DNA strands on the opposite end." [GOC:elh, PMID:16781730]	RAD5(YLR032W)
GO:0016788	5 of 34 (14.7%)	1.76	2.83	207 of 3988 (5.2%)	0.0292	1	hydrolase activity, acting on ester bonds	"Catalysis of the hydrolysis of any ester bond." [GOC:jl]	POL32(YJR043C);RAD27(YKL113C);PLB2(YMR006C);PSO2(YMR137C);POL31(YJR006W)
GO:0000156	1 of 34 (2.9%)	0.03	29.32	4 of 3988 (0.1%)	0.0337	1	phosphorelay response regulator activity	"Responds to a phosphorelay sensor to initiate a change in cell state or activity. The activity of the response regulator is regulated by transfer of a phosphate from a histidine residue in the sensor, to an aspartate residue in the response regulator. Many but not all response regulators act as transcriptional regulators to elicit a response." [GOC:bf, PMID:10966457, PMID:11842140]	SKN7(YHR206W)
GO:0055106	1 of 34 (2.9%)	0.03	29.32	4 of 3988 (0.1%)	0.0337	1	ubiquitin-protein ligase regulator activity	"Modulates the activity of a ubiquitin-protein ligase, an enzyme that catalyzes the covalent attachment of ubiquitin to lysine in a substrate protein." [GOC:BHF, GOC:rl]	ACM1(YPL267W)
GO:0055103	1 of 34 (2.9%)	0.03	29.32	4 of 3988 (0.1%)	0.0337	1	ligase regulator activity	"Modulates the activity of a ligase." [GOC:BHF, GOC:rl]	ACM1(YPL267W)
GO:0061135	1 of 34 (2.9%)	0.03	29.32	4 of 3988 (0.1%)	0.0337	1	endopeptidase regulator activity	"Modulates the activity of a peptidase, any enzyme that hydrolyzes nonterminal peptide bonds in polypeptides." [GOC:dph, GOC:tb]	PUP3(YER094C)
GO:0017048	1 of 34 (2.9%)	0.03	29.32	4 of 3988 (0.1%)	0.0337	1	Rho GTPase binding	"Interacting selectively and non-covalently with Rho protein, any member of the Rho subfamily of the Ras superfamily of monomeric GTPases. Proteins in the Rho subfamily are involved in relaying signals from cell-surface receptors to the actin cytoskeleton." [ISBN:0198547684, PMID:12581856]	EXO70(YJL085W)
GO:0016787	10 of 34 (29.4%)	5.57	1.80	653 of 3988 (16.4%)	0.0406	1	hydrolase activity	"Catalysis of the hydrolysis of various bonds, e.g. C-O, C-N, C-C, phosphoric anhydride bonds, etc. Hydrolase is the systematic name for any enzyme of EC class 3." [ISBN:0198506732]	POL32(YJR043C);RAD27(YKL113C);STE6(YKL209C);RAD5(YLR032W);PLB2(YMR006C);PSO2(YMR137C);RFC5(YBR087W);PUP3(YER094C);POL31(YJR006W);RFC4(YOL094C)
GO:0017108	1 of 34 (2.9%)	0.04	23.46	5 of 3988 (0.1%)	0.0419	1	5'-flap endonuclease activity	"Catalysis of the cleavage of a 5' flap structure in DNA, but not other DNA structures; processes the 5' ends of Okazaki fragments in lagging strand DNA synthesis." [PMID:9778254]	RAD27(YKL113C)
GO:0048256	1 of 34 (2.9%)	0.04	23.46	5 of 3988 (0.1%)	0.0419	1	flap endonuclease activity	"Catalysis of the cleavage of a flap structure in DNA, but not other DNA structures; processes the ends of Okazaki fragments in lagging strand DNA synthesis." [GOC:jid]	RAD27(YKL113C)
GO:0032934	1 of 34 (2.9%)	0.04	23.46	5 of 3988 (0.1%)	0.0419	1	sterol binding	"Interacting selectively and non-covalently with a sterol, any steroid containing a hydroxy group in the 3 position, closely related to cholestan-3-ol." [CHEBI:15889, GOC:mah]	PRY2(YKR013W)
GO:0005496	1 of 34 (2.9%)	0.04	23.46	5 of 3988 (0.1%)	0.0419	1	steroid binding	"Interacting selectively and non-covalently with a steroid, any of a large group of substances that have in common a ring system based on 1,2-cyclopentanoperhydrophenanthrene." [GOC:jl, ISBN:0198506732]	PRY2(YKR013W)
GO:0000400	1 of 34 (2.9%)	0.04	23.46	5 of 3988 (0.1%)	0.0419	1	four-way junction DNA binding	"Interacting selectively and non-covalently with DNA containing four-way junctions, also known as Holliday junctions, a structure where two DNA double strands are held together by reciprocal exchange of two of the four strands, one strand each from the two original helices." [GOC:krc, ISBN:0815332181, PMID:15563464]	RAD5(YLR032W)
GO:0004620	1 of 34 (2.9%)	0.04	23.46	5 of 3988 (0.1%)	0.0419	1	phospholipase activity	"Catalysis of the hydrolysis of a glycerophospholipid." [ISBN:0198506732]	PLB2(YMR006C)
GO:0061134	1 of 34 (2.9%)	0.04	23.46	5 of 3988 (0.1%)	0.0419	1	peptidase regulator activity	"Modulates the activity of a peptidase, any enzyme that catalyzes the hydrolysis peptide bonds." [GOC:dph, GOC:tb]	PUP3(YER094C)
CELLULAR_COMPONENT
GO_term	set	expected	enrichment	background	p_fisher(1side)	fdr	Name	Description
GO:0031391	3 of 34 (8.8%)	0.03	87.97	4 of 3988 (0.1%)	2.25e-06	0.00177	Elg1 RFC-like complex	"A pentameric complex related to replication factor C, which loads the DNA polymerase processivity factor proliferating cell nuclear antigen (PCNA) onto DNA and has roles in telomere length regulation and other aspects of genome stability. In Saccharomyces the subunits are known as Elg1p, Rfc2p, Rfc3p, Rfc4p, and Rfc5p." [PMID:14614842]	ELG1(YOR144C);RFC5(YBR087W);RFC4(YOL094C)
GO:0005657	5 of 34 (14.7%)	0.35	14.30	41 of 3988 (1.0%)	2e-05	0.00783	replication fork	"The Y-shaped region of a replicating DNA molecule, resulting from the separation of the DNA strands and in which the synthesis of new strands takes place. Also includes associated protein complexes." [GOC:mah, ISBN:0198547684]	POL32(YJR043C);REV1(YOR346W);RFC5(YBR087W);POL31(YJR006W);RFC4(YOL094C)
GO:0043625	2 of 34 (5.9%)	0.03	78.20	3 of 3988 (0.1%)	0.000211	0.0349	delta DNA polymerase complex	"A multimeric DNA polymerase enzyme complex which differs in composition amongst species; in humans it is a heterotetramer of four subunits of approximately 125, 50, 68 and 12kDa, while in S. cerevisiae, it has three different subunits which form a heterotrimer, and the active enzyme is a dimer of this heterotrimer. Functions in DNA replication, mismatch repair and excision repair." [GOC:jl, ISBN…	POL32(YJR043C);POL31(YJR006W)
GO:0005663	2 of 34 (5.9%)	0.03	78.20	3 of 3988 (0.1%)	0.000211	0.0349	DNA replication factor C complex	"A complex of five polypeptides in eukaryotes, and two in prokaryotes, that loads the DNA polymerase processivity factor proliferating cell nuclear antigen (PCNA) onto DNA, thereby permitting processive DNA synthesis catalyzed by DNA polymerase." [PMID:14614842, PMID:14646196, PMID:16172520]	RFC5(YBR087W);RFC4(YOL094C)
GO:0044427	9 of 34 (26.5%)	2.21	4.08	259 of 3988 (6.5%)	0.000222	0.0349	chromosomal part	"Any constituent part of a chromosome, a structure composed of a very long molecule of DNA and associated proteins (e.g. histones) that carries hereditary information." [GOC:jl]	LIN1(YHR156C);POL32(YJR043C);RAD5(YLR032W);RIF2(YLR453C);ELG1(YOR144C);REV1(YOR346W);RFC5(YBR087W);POL31(YJR006W);RFC4(YOL094C)
GO:0031389	2 of 34 (5.9%)	0.03	58.65	4 of 3988 (0.1%)	0.000419	0.0498	Rad17 RFC-like complex	"A pentameric protein complex related to replication factor C, which loads a trimeric complex of checkpoint proteins (known as the checkpoint clamp or 9-1-1 complex) onto DNA at damage sites; functions in DNA damage cell cycle checkpoints. In Schizosaccharomyces pombe the subunits are known as Rad17, Rfc2, Rfc3, Rfc4, and Rfc5, while in Saccharomyces cerevisiae the subunits are known as Rad24p, R…	RFC5(YBR087W);RFC4(YOL094C)
GO:0005694	9 of 34 (26.5%)	2.42	3.72	284 of 3988 (7.1%)	0.000445	0.0498	chromosome	"A structure composed of a very long molecule of DNA and associated proteins (e.g. histones) that carries hereditary information." [ISBN:0198547684]	LIN1(YHR156C);POL32(YJR043C);RAD5(YLR032W);RIF2(YLR453C);ELG1(YOR144C);REV1(YOR346W);RFC5(YBR087W);POL31(YJR006W);RFC4(YOL094C)
GO:0031390	2 of 34 (5.9%)	0.05	39.10	6 of 3988 (0.2%)	0.00104	0.102	Ctf18 RFC-like complex	"A heptameric complex related to replication factor C, which loads the DNA polymerase processivity factor proliferating cell nuclear antigen (PCNA) onto DNA and plays a vital role in chromosome cohesion. In Saccharomyces the subunits are known as Ctf18p, Rfc2p, Rfc3p, Rfc4p, Rfc5p, Dcc1p, and Ctf8p." [PMID:14614842]	RFC5(YBR087W);RFC4(YOL094C)
GO:0042575	2 of 34 (5.9%)	0.07	29.32	8 of 3988 (0.2%)	0.00191	0.167	DNA polymerase complex	"A protein complex that possesses DNA polymerase activity and is involved in template directed synthesis of DNA." [GOC:jl, PMID:12045093]	POL32(YJR043C);POL31(YJR006W)
GO:0032993	3 of 34 (8.8%)	0.38	8.00	44 of 3988 (1.1%)	0.00591	0.393	protein-DNA complex	"A macromolecular complex containing both protein and DNA molecules." [GOC:mah]	POL32(YJR043C);RIF2(YLR453C);POL31(YJR006W)
GO:0043601	2 of 34 (5.9%)	0.12	16.76	14 of 3988 (0.4%)	0.00602	0.393	nuclear replisome	"A multi-component enzymatic machine at the nuclear replication fork, which mediates DNA replication. Includes DNA primase, one or more DNA polymerases, DNA helicases, and other proteins." [GOC:jl, GOC:mtg_sensu]	POL32(YJR043C);POL31(YJR006W)
GO:0030894	2 of 34 (5.9%)	0.12	16.76	14 of 3988 (0.4%)	0.00602	0.393	replisome	"A multi-component enzymatic machine at the replication fork which mediates DNA replication. Includes DNA primase, one or more DNA polymerases, DNA helicases, and other proteins." [GOC:mah, GOC:vw]	POL32(YJR043C);POL31(YJR006W)
GO:0005576	3 of 34 (8.8%)	0.52	5.77	61 of 3988 (1.5%)	0.0145	0.877	extracellular region	"The space external to the outermost structure of a cell. For cells without external protective or external encapsulating structures this refers to space outside of the plasma membrane. This term covers the host cell environment outside an intracellular parasite." [GOC:go_curators]	PAU24(YBR301W);PRY2(YKR013W);PLB2(YMR006C)
GO:0009277	3 of 34 (8.8%)	0.54	5.59	63 of 3988 (1.6%)	0.0159	0.881	fungal-type cell wall	"A rigid yet dynamic structure surrounding the plasma membrane that affords protection from stresses and contributes to cell morphogenesis, consisting of extensively cross-linked glycoproteins and carbohydrates. The glycoproteins may be modified with N- or O-linked carbohydrates, or glycosylphosphatidylinositol (GPI) anchors; the polysaccharides are primarily branched glucans, including beta-link…	PAU24(YBR301W);PLB2(YMR006C);YNL190W(YNL190W)
GO:0005618	3 of 34 (8.8%)	0.56	5.33	66 of 3988 (1.7%)	0.018	0.881	cell wall	"The rigid or semi-rigid envelope lying outside the cell membrane of plant, fungal, and most prokaryotic cells, maintaining their shape and protecting them from osmotic lysis. In plants it is made of cellulose and, often, lignin; in fungi it is composed largely of polysaccharides; in bacteria it is composed of peptidoglycan." [ISBN:0198547684]	PAU24(YBR301W);PLB2(YMR006C);YNL190W(YNL190W)
GO:0030312	3 of 34 (8.8%)	0.56	5.33	66 of 3988 (1.7%)	0.018	0.881	external encapsulating structure	"A structure that lies outside the plasma membrane and surrounds the entire cell." [GOC:go_curators]	PAU24(YBR301W);PLB2(YMR006C);YNL190W(YNL190W)
GO:0044454	5 of 34 (14.7%)	1.70	2.95	199 of 3988 (5.0%)	0.0251	1	nuclear chromosome part	"Any constituent part of a nuclear chromosome, a chromosome found in the nucleus of a eukaryotic cell." [GOC:jl]	POL32(YJR043C);RAD5(YLR032W);RIF2(YLR453C);REV1(YOR346W);POL31(YJR006W)
GO:0009331	1 of 34 (2.9%)	0.03	39.10	3 of 3988 (0.1%)	0.0254	1	glycerol-3-phosphate dehydrogenase complex	"An enzyme complex that catalyzes the dehydrogenation of sn-glycerol 3-phosphate to form glycerone phosphate." [EC:1.1.5.3]	GPD1(YDL022W)
GO:0043332	3 of 34 (8.8%)	0.66	4.57	77 of 3988 (1.9%)	0.027	1	mating projection tip	"The apex of the mating projection in unicellular fungi exposed to mating pheromone; site of polarized growth." [GOC:mcc]	STE6(YKL209C);YMR295C(YMR295C);EXO70(YJL085W)
GO:0044463	3 of 34 (8.8%)	0.68	4.40	80 of 3988 (2.0%)	0.0298	1	cell projection part	"Any constituent part of a cell projection, a prolongation or process extending from a cell, e.g. a flagellum or axon." [GOC:jl]	STE6(YKL209C);YMR295C(YMR295C);EXO70(YJL085W)
GO:0000781	2 of 34 (5.9%)	0.28	7.11	33 of 3988 (0.8%)	0.0316	1	chromosome, telomeric region	"The terminal region of a linear chromosome that includes the telomeric DNA repeats and associated proteins." [GOC:elh]	RIF2(YLR453C);ELG1(YOR144C)
GO:0019774	1 of 34 (2.9%)	0.03	29.32	4 of 3988 (0.1%)	0.0337	1	proteasome core complex, beta-subunit complex	"The proteasome core subcomplex that constitutes the two inner rings of the proteasome core complex. An example of this component is found in Mus musculus." [GOC:jl, GOC:mtg_sensu, GOC:rb, PMID:10854779]	PUP3(YER094C)
GO:0043596	2 of 34 (5.9%)	0.30	6.70	35 of 3988 (0.9%)	0.0352	1	nuclear replication fork	"The Y-shaped region of a nuclear replicating DNA molecule, resulting from the separation of the DNA strands and in which the synthesis of new strands takes place. Also includes associated protein complexes." [GOC:jl, GOC:mtg_sensu]	POL32(YJR043C);POL31(YJR006W)
GO:0000228	5 of 34 (14.7%)	1.87	2.68	219 of 3988 (5.5%)	0.0361	1	nuclear chromosome	"A chromosome found in the nucleus of a eukaryotic cell." [GOC:mah]	POL32(YJR043C);RAD5(YLR032W);RIF2(YLR453C);REV1(YOR346W);POL31(YJR006W)
GO:0005937	3 of 34 (8.8%)	0.74	4.04	87 of 3988 (2.2%)	0.0369	1	mating projection	"The projection formed by unicellular fungi in response to mating pheromone." [GOC:mcc]	STE6(YKL209C);YMR295C(YMR295C);EXO70(YJL085W)
GO:0042995	3 of 34 (8.8%)	0.74	4.04	87 of 3988 (2.2%)	0.0369	1	cell projection	"A prolongation or process extending from a cell, e.g. a flagellum or axon." [GOC:jl, http://www.cogsci.princeton.edu/~wn/]	STE6(YKL209C);YMR295C(YMR295C);EXO70(YJL085W)
GO:0005634	18 of 34 (52.9%)	12.78	1.41	1499 of 3988 (37.6%)	0.0484	1	nucleus	"A membrane-bounded organelle of eukaryotic cells in which chromosomes are housed and replicated. In most cells, the nucleus contains all of the cell's chromosomes except the organellar chromosomes, and is the site of RNA synthesis and processing. In some species, or in specialized cell types, RNA metabolism or DNA replication may be absent." [GOC:go_curators]	TBS1(YBR150C);GPD1(YDL022W);LIN1(YHR156C);SKN7(YHR206W);POL32(YJR043C);RAD27(YKL113C);RAD5(YLR032W);RIF2(YLR453C);YML108W(YML108W);PSO2(YMR137C);ELG1(YOR144C);REV1(YOR346W);ACM1(YPL267W);RFC5(YBR087W);PUP3(YER094C);POL31(YJR006W);RPC37(YKR025W);RFC4(YOL094C)

## Sheet: Randomization 7
BIOLOGICAL_PROCESS
GO_term	set	expected	enrichment	background	p_fisher(1side)	fdr	Name	Description
GO:0006272	4 of 34 (11.8%)	0.08	52.13	9 of 3988 (0.2%)	5.39e-07	0.00203	leading strand elongation	"The synthesis of DNA from a template strand in the 5' to 3' direction; leading strand elongation is continuous as it proceeds in the same direction as the replication fork." [ISBN:071673706X, ISBN:0815316194]	POL32(YJR043C);RFC5(YBR087W);POL31(YJR006W);RFC4(YOL094C)
GO:0006271	5 of 34 (14.7%)	0.20	24.44	24 of 3988 (0.6%)	1.26e-06	0.00203	DNA strand elongation involved in DNA replication	"The process in which a DNA strand is synthesized from template DNA during replication by the action of polymerases, which add nucleotides to the 3' end of the nascent DNA strand." [ISBN:071673706X, ISBN:0815316194]	POL32(YJR043C);RAD27(YKL113C);RFC5(YBR087W);POL31(YJR006W);RFC4(YOL094C)
GO:0022616	5 of 34 (14.7%)	0.21	23.46	25 of 3988 (0.6%)	1.56e-06	0.00203	DNA strand elongation	"The DNA metabolic process in which a DNA strand is synthesized by adding nucleotides to the 3' end of an existing DNA stand." [GOC:isa_complete]	POL32(YJR043C);RAD27(YKL113C);RFC5(YBR087W);POL31(YJR006W);RFC4(YOL094C)
GO:0006260	8 of 34 (23.5%)	0.98	8.16	115 of 3988 (2.9%)	3.64e-06	0.00354	DNA replication	"The cellular metabolic process in which a cell duplicates one or more molecules of DNA. DNA replication begins when specific sequences, known as origins of replication, are recognized and bound by initiation proteins, and ends when the original DNA molecule has been completely duplicated and the copies topologically separated. The unit of replication usually corresponds to the genome of the cell…	POL32(YJR043C);RAD27(YKL113C);RIF2(YLR453C);ELG1(YOR144C);REV1(YOR346W);RFC5(YBR087W);POL31(YJR006W);RFC4(YOL094C)
GO:0006298	4 of 34 (11.8%)	0.14	27.60	17 of 3988 (0.4%)	9.7e-06	0.00756	mismatch repair	"A system for the correction of errors in which an incorrect base, which cannot form hydrogen bonds with the corresponding base in the parent strand, is incorporated into the daughter strand. The mismatch repair system promotes genomic fidelity by repairing base-base mismatches, insertion-deletion loops and heterologies generated during DNA replication and recombination." [ISBN:0198506732, PMID:1…	POL32(YJR043C);RFC5(YBR087W);POL31(YJR006W);RFC4(YOL094C)
GO:0043137	3 of 34 (8.8%)	0.06	50.27	7 of 3988 (0.2%)	1.94e-05	0.0126	DNA replication, removal of RNA primer	"Removal of the Okazaki RNA primer from the lagging strand of replicating DNA, by a combination of the actions of DNA polymerase, DNA helicase and an endonuclease." [GOC:jl, PMID:12424238]	POL32(YJR043C);RAD27(YKL113C);POL31(YJR006W)
GO:0006281	9 of 34 (26.5%)	1.68	5.36	197 of 3988 (4.9%)	2.61e-05	0.0145	DNA repair	"The process of restoring DNA after damage. Genomes are subject to damage by chemical and physical agents in the environment (e.g. UV and ionizing radiations, chemical mutagens, fungal and bacterial toxins, etc.) and by free radicals or alkylating agents endogenously generated in metabolism. DNA is also damaged because of errors during its replication. A variety of different DNA repair pathways h…	POL32(YJR043C);RAD27(YKL113C);RAD5(YLR032W);PSO2(YMR137C);ELG1(YOR144C);REV1(YOR346W);RFC5(YBR087W);POL31(YJR006W);RFC4(YOL094C)
GO:0006301	4 of 34 (11.8%)	0.20	20.40	23 of 3988 (0.6%)	3.48e-05	0.017	postreplication repair	"The conversion of DNA-damage induced single-stranded gaps into large molecular weight DNA after replication. Includes pathways that remove replication-blocking lesions in conjunction with DNA replication." [GOC:elh]	POL32(YJR043C);RAD5(YLR032W);REV1(YOR346W);POL31(YJR006W)
GO:0033567	3 of 34 (8.8%)	0.08	39.10	9 of 3988 (0.2%)	4.59e-05	0.0199	DNA replication, Okazaki fragment processing	"The DNA metabolic process, occurring during lagging strand synthesis, by which RNA primers are removed from Okazaki fragments, the resulting gaps filled by DNA polymerization, and the ends ligated to form a continuous strand." [GOC:mah, ISBN:0716720094]	POL32(YJR043C);RAD27(YKL113C);POL31(YJR006W)
GO:0006261	6 of 34 (17.6%)	0.71	8.48	83 of 3988 (2.1%)	5.72e-05	0.0223	DNA-dependent DNA replication	"A DNA replication process that uses parental DNA as a template for the DNA-dependent DNA polymerases that synthesize the new strands." [GOC:mah, ISBN:0198506732]	POL32(YJR043C);RAD27(YKL113C);ELG1(YOR144C);RFC5(YBR087W);POL31(YJR006W);RFC4(YOL094C)
GO:0006974	9 of 34 (26.5%)	1.95	4.61	229 of 3988 (5.7%)	8.6e-05	0.0305	response to DNA damage stimulus	"Any process that results in a change in state or activity of a cell (in terms of movement, secretion, enzyme production, gene expression, etc.) as a result of a stimulus indicating damage to its DNA from environmental insults or errors during metabolism." [GOC:go_curators]	POL32(YJR043C);RAD27(YKL113C);RAD5(YLR032W);PSO2(YMR137C);ELG1(YOR144C);REV1(YOR346W);RFC5(YBR087W);POL31(YJR006W);RFC4(YOL094C)
GO:0033554	12 of 34 (35.3%)	3.62	3.31	425 of 3988 (10.7%)	0.000113	0.0366	cellular response to stress	"Any process that results in a change in state or activity of a cell (in terms of movement, secretion, enzyme production, gene expression, etc.) as a result of a stimulus indicating the organism is under stress. The stress is usually, but not necessarily, exogenous (e.g. temperature, humidity, ionizing radiation)." [GOC:mah]	GPD1(YDL022W);SKN7(YHR206W);POL32(YJR043C);RAD27(YKL113C);RAD5(YLR032W);PSO2(YMR137C);YNL190W(YNL190W);ELG1(YOR144C);REV1(YOR346W);RFC5(YBR087W);POL31(YJR006W);RFC4(YOL094C)
GO:0006273	3 of 34 (8.8%)	0.11	27.07	13 of 3988 (0.3%)	0.000153	0.0425	lagging strand elongation	"The synthesis of DNA from a template strand in a net 3' to 5' direction. Lagging strand DNA elongation proceeds by discontinuous synthesis of short stretches of DNA, known as Okazaki fragments, from RNA primers; these fragments are then joined by DNA ligase. Although each segment of nascent DNA is synthesized in the 5' to 3' direction, the overall direction of lagging strand synthesis is 3' to 5…	POL32(YJR043C);RAD27(YKL113C);POL31(YJR006W)
GO:0006284	3 of 34 (8.8%)	0.11	27.07	13 of 3988 (0.3%)	0.000153	0.0425	base-excision repair	"In base excision repair, an altered base is removed by a DNA glycosylase enzyme, followed by excision of the resulting sugar phosphate. The small gap left in the DNA helix is filled in by the sequential action of DNA polymerase and DNA ligase." [ISBN:0815316194]	POL32(YJR043C);RAD27(YKL113C);POL31(YJR006W)
GO:0071897	3 of 34 (8.8%)	0.13	23.46	15 of 3988 (0.4%)	0.00024	0.0624	DNA biosynthetic process	"The cellular DNA metabolic process resulting in the formation of DNA, deoxyribonucleic acid, one of the two main types of nucleic acid, consisting of a long unbranched macromolecule formed from one or two strands of linked deoxyribonucleotides, the 3'-phosphate group of each constituent deoxyribonucleotide being joined in 3',5'-phosphodiester linkage to the 5'-hydroxyl group of the deoxyribose m…	RAD27(YKL113C);RAD5(YLR032W);REV1(YOR346W)
GO:0006302	5 of 34 (14.7%)	0.62	8.03	73 of 3988 (1.8%)	0.000329	0.0769	double-strand break repair	"The repair of double-strand breaks in DNA via homologous and nonhomologous mechanisms to reform a continuous DNA helix." [GOC:elh]	POL32(YJR043C);RAD27(YKL113C);RAD5(YLR032W);PSO2(YMR137C);ELG1(YOR144C)
GO:0006950	13 of 34 (38.2%)	4.71	2.76	552 of 3988 (13.8%)	0.000339	0.0769	response to stress	"Any process that results in a change in state or activity of a cell or an organism (in terms of movement, secretion, enzyme production, gene expression, etc.) as a result of a disturbance in organismal or cellular homeostasis, usually, but not necessarily, exogenous (e.g. temperature, humidity, ionizing radiation)." [GOC:mah]	PAU24(YBR301W);GPD1(YDL022W);SKN7(YHR206W);POL32(YJR043C);RAD27(YKL113C);RAD5(YLR032W);PSO2(YMR137C);YNL190W(YNL190W);ELG1(YOR144C);REV1(YOR346W);RFC5(YBR087W);POL31(YJR006W);RFC4(YOL094C)
GO:0006278	3 of 34 (8.8%)	0.14	20.70	17 of 3988 (0.4%)	0.000355	0.0769	RNA-dependent DNA replication	"A DNA replication process that uses RNA as a template for RNA-dependent DNA polymerases (e.g. reverse transcriptase) that synthesize the new strands." [GOC:mah, ISBN:0198506732]	POL32(YJR043C);RIF2(YLR453C);POL31(YJR006W)
GO:0006259	10 of 34 (29.4%)	2.92	3.42	343 of 3988 (8.6%)	0.00039	0.0799	DNA metabolic process	"Any cellular metabolic process involving deoxyribonucleic acid. This is one of the two main types of nucleic acid, consisting of a long, unbranched macromolecule formed from one, or more commonly, two, strands of linked deoxyribonucleotides." [ISBN:0198506732]	POL32(YJR043C);RAD27(YKL113C);RAD5(YLR032W);RIF2(YLR453C);PSO2(YMR137C);ELG1(YOR144C);REV1(YOR346W);RFC5(YBR087W);POL31(YJR006W);RFC4(YOL094C)
GO:0042276	2 of 34 (5.9%)	0.09	23.46	10 of 3988 (0.3%)	0.00304	0.593	error-prone translesion synthesis	"The conversion of DNA-damage induced single-stranded gaps into large molecular weight DNA after replication by using a specialized DNA polymerase or replication complex to insert a defined nucleotide across the lesion. This process does not remove the replication-blocking lesions and causes an increase in the endogenous mutation level. For example, in E. coli, a low fidelity DNA polymerase, pol …	RAD5(YLR032W);REV1(YOR346W)
GO:0065008	8 of 34 (23.5%)	2.58	3.10	303 of 3988 (7.6%)	0.0032	0.594	regulation of biological quality	"Any process that modulates a qualitative or quantitative trait of a biological quality. A biological quality is a measurable attribute of an organism or part of an organism, such as size, mass, shape, color, etc." [GOC:dph, GOC:isa_complete, GOC:mah, GOC:pr, GOC:vw]	GPD1(YDL022W);SKN7(YHR206W);MNR2(YKL064W);STE6(YKL209C);RAD5(YLR032W);RIF2(YLR453C);ELG1(YOR144C);FSF1(YOR271C)
GO:0019985	2 of 34 (5.9%)	0.10	19.55	12 of 3988 (0.3%)	0.00441	0.782	translesion synthesis	"The replication of damaged DNA by synthesis across a lesion in the template strand; a specialized DNA polymerase or replication complex inserts a defined nucleotide across from the lesion which allows DNA synthesis to continue beyond the lesion. This process can be mutagenic depending on the damaged nucleotide and the inserted nucleotide." [GOC:elh, PMID:10535901]	RAD5(YLR032W);REV1(YOR346W)
GO:0042592	6 of 34 (17.6%)	1.62	3.70	190 of 3988 (4.8%)	0.00475	0.786	homeostatic process	"Any biological process involved in the maintenance of an internal steady state." [GOC:jl, ISBN:0395825172]	GPD1(YDL022W);MNR2(YKL064W);RAD5(YLR032W);RIF2(YLR453C);ELG1(YOR144C);FSF1(YOR271C)
GO:0007062	3 of 34 (8.8%)	0.35	8.58	41 of 3988 (1.0%)	0.00484	0.786	sister chromatid cohesion	"The cell cycle process in which the sister chromatids of a replicated chromosome are joined along the entire length of the chromosome." [GOC:mah, ISBN:0815316194]	ELG1(YOR144C);RFC5(YBR087W);RFC4(YOL094C)
GO:0050896	14 of 34 (41.2%)	7.08	1.98	830 of 3988 (20.8%)	0.00542	0.832	response to stimulus	"Any process that results in a change in state or activity of a cell or an organism (in terms of movement, secretion, enzyme production, gene expression, etc.) as a result of a stimulus. The process begins with detection of the stimulus and ends with a change in state or activity or the cell or organism." [GOC:ai, GOC:bf]	PAU24(YBR301W);GPD1(YDL022W);SKN7(YHR206W);POL32(YJR043C);RAD27(YKL113C);STE6(YKL209C);RAD5(YLR032W);PSO2(YMR137C);YNL190W(YNL190W);ELG1(YOR144C);REV1(YOR346W);RFC5(YBR087W);POL31(YJR006W);RFC4(YOL094C)
GO:0051716	12 of 34 (35.3%)	5.56	2.16	652 of 3988 (16.3%)	0.00555	0.832	cellular response to stimulus	"Any process that results in a change in state or activity of a cell (in terms of movement, secretion, enzyme production, gene expression, etc.) as a result of a stimulus. The process begins with detection of the stimulus by a cell and ends with a change in state or activity or the cell." [GOC:bf, GOC:jl]	GPD1(YDL022W);SKN7(YHR206W);POL32(YJR043C);RAD27(YKL113C);RAD5(YLR032W);PSO2(YMR137C);YNL190W(YNL190W);ELG1(YOR144C);REV1(YOR346W);RFC5(YBR087W);POL31(YJR006W);RFC4(YOL094C)
GO:0006973	1 of 34 (2.9%)	0.01	117.29	1 of 3988 (0.0%)	0.00853	0.852	intracellular accumulation of glycerol	"The accumulation of glycerol within a cell, for example by increased glycerol biosynthesis combined with decreased permeability of the cell membrane to glycerol, in response to the detection of a hyperosmotic environment." [GOC:jl, PMID:11752666]	GPD1(YDL022W)
GO:0010961	1 of 34 (2.9%)	0.01	117.29	1 of 3988 (0.0%)	0.00853	0.852	cellular magnesium ion homeostasis	"Any process involved in the maintenance of an internal steady state of magnesium ions at the level of a cell." [GOC:dph, GOC:tb]	MNR2(YKL064W)
GO:0010960	1 of 34 (2.9%)	0.01	117.29	1 of 3988 (0.0%)	0.00853	0.852	magnesium ion homeostasis	"Any process involved in the maintenance of an internal steady state of magnesium ions within an organism or cell." [GOC:dph, GOC:tb]	MNR2(YKL064W)
GO:0006286	1 of 34 (2.9%)	0.01	117.29	1 of 3988 (0.0%)	0.00853	0.852	base-excision repair, base-free sugar-phosphate removal	"Excision of the sugar phosphate residue at an AP site, i.e. a deoxyribose sugar with a missing base, by a phosphodiesterase enzyme." [ISBN:0815316194]	RAD27(YKL113C)
GO:0000770	1 of 34 (2.9%)	0.01	117.29	1 of 3988 (0.0%)	0.00853	0.852	peptide pheromone export	"The directed movement of a peptide pheromone out of a cell by a secretion or export pathway used solely for the export of peptide pheromones." [GOC:elh]	STE6(YKL209C)
GO:0030072	1 of 34 (2.9%)	0.01	117.29	1 of 3988 (0.0%)	0.00853	0.852	peptide hormone secretion	"The regulated release of a peptide hormone from a cell or organ." [GOC:mah]	STE6(YKL209C)
GO:0002790	1 of 34 (2.9%)	0.01	117.29	1 of 3988 (0.0%)	0.00853	0.852	peptide secretion	"The controlled release of a peptide from a cell or group of cells." [GOC:add]	STE6(YKL209C)
GO:0046879	1 of 34 (2.9%)	0.01	117.29	1 of 3988 (0.0%)	0.00853	0.852	hormone secretion	"The regulated release of hormones, substances with a specific regulatory effect on a particular organ or group of cells." [ISBN:0198506732]	STE6(YKL209C)
GO:0009914	1 of 34 (2.9%)	0.01	117.29	1 of 3988 (0.0%)	0.00853	0.852	hormone transport	"The directed movement of hormones into, out of or within a cell, or between cells, by means of some agent such as a transporter or pore." [GOC:tb]	STE6(YKL209C)
GO:0023061	1 of 34 (2.9%)	0.01	117.29	1 of 3988 (0.0%)	0.00853	0.852	signal release	"The process in which a signal is secreted or discharged into the extracellular medium from a cellular source." [GOC:mtg_signal]	STE6(YKL209C)
GO:0010817	1 of 34 (2.9%)	0.01	117.29	1 of 3988 (0.0%)	0.00853	0.852	regulation of hormone levels	"Any process that modulates the levels of hormone within an organism or a tissue. A hormone is any substance formed in very small amounts in one specialized organ or group of cells and carried (sometimes in the bloodstream) to another organ or group of cells in the same organism, upon which it has a specific regulatory action." [GOC:BHF, GOC:dph, GOC:tb]	STE6(YKL209C)
GO:0003001	1 of 34 (2.9%)	0.01	117.29	1 of 3988 (0.0%)	0.00853	0.852	generation of a signal involved in cell-cell signaling	"The cellular process that creates a physical entity or change in state, i.e. a signal, that originates in one cell and is used to transfer information to another cell. This process begins with the initial formation of the signal and ends with the mature form and placement of the signal." [GOC:dph]	STE6(YKL209C)
GO:0007267	1 of 34 (2.9%)	0.01	117.29	1 of 3988 (0.0%)	0.00853	0.852	cell-cell signaling	"Any process that mediates the transfer of information from one cell to another." [GOC:mah]	STE6(YKL209C)
GO:0046168	1 of 34 (2.9%)	0.02	58.65	2 of 3988 (0.1%)	0.017	1	glycerol-3-phosphate catabolic process	"The chemical reactions and pathways resulting in the breakdown of glycerol-3-phosphate, a phosphoric monoester of glycerol." [GOC:ai]	GPD1(YDL022W)
GO:0034553	1 of 34 (2.9%)	0.02	58.65	2 of 3988 (0.1%)	0.017	1	mitochondrial respiratory chain complex II assembly	"The aggregation, arrangement and bonding together of a set of components to form respiratory chain complex II, in the mitochondrial inner membrane." [GOC:dgf]	YDR379C-A(YDR379C-A)
GO:0034552	1 of 34 (2.9%)	0.02	58.65	2 of 3988 (0.1%)	0.017	1	respiratory chain complex II assembly	"The aggregation, arrangement and bonding together of a set of components to form respiratory chain complex II." [GOC:dgf]	YDR379C-A(YDR379C-A)
GO:0097032	1 of 34 (2.9%)	0.02	58.65	2 of 3988 (0.1%)	0.017	1	mitochondrial respiratory chain complex II biogenesis	"The biogenesis of a mitochondrial respiratory chain complex II, a protein complex located in the mitochondrial inner membrane that forms part of the mitochondrial respiratory chain. Includes the synthesis of constituent proteins and their aggregation, arrangement and bonding together." [GOC:pr]	YDR379C-A(YDR379C-A)
GO:0000734	1 of 34 (2.9%)	0.02	58.65	2 of 3988 (0.1%)	0.017	1	gene conversion at mating-type locus, DNA repair synthesis	"Synthesis of DNA that proceeds from the broken 3' single-strand DNA end uses the homologous intact duplex as the template during gene conversion at the mating-type locus." [GOC:elh]	RAD27(YKL113C)
GO:0042631	1 of 34 (2.9%)	0.02	58.65	2 of 3988 (0.1%)	0.017	1	cellular response to water deprivation	"Any process that results in a change in state or activity of a cell (in terms of movement, secretion, enzyme production, gene expression, etc.) as a result of deprivation of water." [GOC:go_curators]	YNL190W(YNL190W)
GO:0009414	1 of 34 (2.9%)	0.02	58.65	2 of 3988 (0.1%)	0.017	1	response to water deprivation	"Any process that results in a change in state or activity of a cell or an organism (in terms of movement, secretion, enzyme production, gene expression, etc.) as a result of a water deprivation stimulus, prolonged deprivation of water." [GOC:lr]	YNL190W(YNL190W)
GO:0006072	1 of 34 (2.9%)	0.03	39.10	3 of 3988 (0.1%)	0.0254	1	glycerol-3-phosphate metabolic process	"The chemical reactions and pathways involving glycerol-3-phosphate, a phosphoric monoester of glycerol." [GOC:go_curators, ISBN:0198506732]	GPD1(YDL022W)
GO:0000304	1 of 34 (2.9%)	0.03	39.10	3 of 3988 (0.1%)	0.0254	1	response to singlet oxygen	"Any process that results in a change in state or activity of a cell or an organism (in terms of movement, secretion, enzyme production, gene expression, etc.) as a result of a singlet oxygen stimulus. Singlet oxygen is a dioxygen (O2) molecule in which two 2p electrons have similar spin. Singlet oxygen is more highly reactive than the form in which these electrons are of opposite spin, and it is…	SKN7(YHR206W)
GO:0010994	1 of 34 (2.9%)	0.03	39.10	3 of 3988 (0.1%)	0.0254	1	free ubiquitin chain polymerization	"The process of creating free ubiquitin chains, compounds composed of a large number of ubiquitin monomers. These chains are not conjugated to a protein." [GOC:BHF, GOC:dph, GOC:tb]	RAD5(YLR032W)
GO:0051436	1 of 34 (2.9%)	0.03	39.10	3 of 3988 (0.1%)	0.0254	1	negative regulation of ubiquitin-protein ligase activity involved in mitotic cell cycle	"Any process that stops, prevents, or reduces the frequency, rate or extent of ubiquitin ligase activity that contributes to the mitotic cell cycle." [GOC:ai, GOC:tb]	ACM1(YPL267W)
GO:0071214	2 of 34 (5.9%)	0.28	7.11	33 of 3988 (0.8%)	0.0316	1	cellular response to abiotic stimulus	"Any process that results in a change in state or activity of a cell (in terms of movement, secretion, enzyme production, gene expression, etc.) as a result of an abiotic (non-living) stimulus." [GOC:mah]	GPD1(YDL022W);YNL190W(YNL190W)
GO:0006401	3 of 34 (8.8%)	0.70	4.29	82 of 3988 (2.1%)	0.0317	1	RNA catabolic process	"The chemical reactions and pathways resulting in the breakdown of RNA, ribonucleic acid, one of the two main type of nucleic acid, consisting of a long, unbranched macromolecule formed from ribonucleotides joined in 3',5'-phosphodiester linkage." [ISBN:0198506732]	POL32(YJR043C);RAD27(YKL113C);POL31(YJR006W)
GO:0000731	1 of 34 (2.9%)	0.03	29.32	4 of 3988 (0.1%)	0.0337	1	DNA synthesis involved in DNA repair	"Synthesis of DNA that proceeds from the broken 3' single-strand DNA end uses the homologous intact duplex as the template." [PMID:10357855]	RAD27(YKL113C)
GO:0010993	1 of 34 (2.9%)	0.03	29.32	4 of 3988 (0.1%)	0.0337	1	regulation of ubiquitin homeostasis	"Any process that modulates the rate, frequency, or extent of ubiquitin homeostasis. Ubiquitin homeostasis is any process involved in the maintenance of an internal steady state of ubiquitin monomers and free ubiquitin chains at the level of the cell." [GOC:BHF, GOC:dph, GOC:tb]	RAD5(YLR032W)
GO:0010992	1 of 34 (2.9%)	0.03	29.32	4 of 3988 (0.1%)	0.0337	1	ubiquitin homeostasis	"Any process involved in the maintenance of an internal steady state of ubiquitin monomers and free ubiquitin chains at the level of the cell." [GOC:BHF, GOC:dph, GOC:tb]	RAD5(YLR032W)
GO:0071462	1 of 34 (2.9%)	0.03	29.32	4 of 3988 (0.1%)	0.0337	1	cellular response to water stimulus	"Any process that results in a change in state or activity of a cell (in terms of movement, secretion, enzyme production, gene expression, etc.) as a result of a stimulus reflecting the presence, absence, or concentration of water." [GOC:mah]	YNL190W(YNL190W)
GO:0009415	1 of 34 (2.9%)	0.03	29.32	4 of 3988 (0.1%)	0.0337	1	response to water stimulus	"Any process that results in a change in state or activity of a cell or an organism (in terms of movement, secretion, enzyme production, gene expression, etc.) as a result of a stimulus reflecting the presence, absence, or concentration of water." [GOC:jl]	YNL190W(YNL190W)
GO:0051444	1 of 34 (2.9%)	0.03	29.32	4 of 3988 (0.1%)	0.0337	1	negative regulation of ubiquitin-protein ligase activity	"Any process that stops, prevents, or reduces the frequency, rate or extent of ubiquitin ligase activity, the catalysis of the reaction: ATP + ubiquitin + protein lysine = AMP + diphosphate + protein N-ubiquityllysine." [EC:6.3.2.19, GOC:ai, GOC:tb]	ACM1(YPL267W)
GO:0031397	1 of 34 (2.9%)	0.03	29.32	4 of 3988 (0.1%)	0.0337	1	negative regulation of protein ubiquitination	"Any process that stops, prevents, or reduces the frequency, rate or extent of the addition of ubiquitin groups to a protein." [GOC:mah]	ACM1(YPL267W)
GO:0051352	1 of 34 (2.9%)	0.03	29.32	4 of 3988 (0.1%)	0.0337	1	negative regulation of ligase activity	"Any process that stops or reduces the rate of ligase activity, the catalysis of the ligation of two substances with concomitant breaking of a diphosphate linkage, usually in a nucleoside triphosphate." [GOC:ai]	ACM1(YPL267W)
GO:0016567	3 of 34 (8.8%)	0.74	4.04	87 of 3988 (2.2%)	0.0369	1	protein ubiquitination	"The process in which one or more ubiquitin groups are added to a protein." [GOC:ai]	DAS1(YJL149W);RAD5(YLR032W);ACM1(YPL267W)
GO:0000724	2 of 34 (5.9%)	0.32	6.34	37 of 3988 (0.9%)	0.039	1	double-strand break repair via homologous recombination	"The error-free repair of a double-strand break in DNA in which the broken DNA molecule is repaired using homologous sequences. A strand in the broken DNA searches for a homologous region in an intact chromosome to serve as the template for DNA synthesis. The restoration of two intact DNA molecules results in the exchange, reciprocal or nonreciprocal, of genetic material between the intact DNA mo…	POL32(YJR043C);ELG1(YOR144C)
GO:0006289	2 of 34 (5.9%)	0.32	6.17	38 of 3988 (1.0%)	0.041	1	nucleotide-excision repair	"A DNA repair process in which a small region of the strand surrounding the damage is removed from the DNA helix as an oligonucleotide. The small gap left in the DNA helix is filled in by the sequential action of DNA polymerase and DNA ligase. Nucleotide excision repair recognizes a wide range of substrates, including damage caused by UV irradiation (pyrimidine dimers and 6-4 photoproducts) and c…	POL32(YJR043C);POL31(YJR006W)
GO:0000160	1 of 34 (2.9%)	0.04	23.46	5 of 3988 (0.1%)	0.0419	1	phosphorelay signal transduction system	"A conserved series of molecular signals found in prokaryotes and eukaryotes; involves autophosphorylation of a histidine kinase and the transfer of the phosphate group to an aspartate that then acts as a phospho-donor to response regulator proteins." [PMID:9191038]	SKN7(YHR206W)
GO:0043619	1 of 34 (2.9%)	0.04	23.46	5 of 3988 (0.1%)	0.0419	1	regulation of transcription from RNA polymerase II promoter in response to oxidative stress	"Modulation of the frequency, rate or extent of transcription from an RNA polymerase II promoter as a result of a stimulus indicating the organism is under oxidative stress, a state often resulting from exposure to high levels of reactive oxygen species, e.g. superoxide anions, hydrogen peroxide (H2O2), and hydroxyl radicals." [GOC:jl]	SKN7(YHR206W)
GO:0051439	1 of 34 (2.9%)	0.04	23.46	5 of 3988 (0.1%)	0.0419	1	regulation of ubiquitin-protein ligase activity involved in mitotic cell cycle	"A cell cycle process that modulates the frequency, rate or extent of ubiquitin ligase activity that contributes to the mitotic cell cycle." [GOC:ai]	ACM1(YPL267W)
GO:1901700	2 of 34 (5.9%)	0.33	6.02	39 of 3988 (1.0%)	0.0429	1	response to oxygen-containing compound	"Any process that results in a change in state or activity of a cell or an organism (in terms of movement, secretion, enzyme production, gene expression, etc.) as a result of an oxygen-containing compound stimulus." [GOC:pr, GOC:TermGenie]	SKN7(YHR206W);YNL190W(YNL190W)
Depleted
GO:0010467	4 of 34 (11.8%)	9.28	0.43	1088 of 3988 (27.3%)	0.0258	1	gene expression	"The process in which a gene's sequence is converted into a mature gene product or products (proteins or RNA). This includes the production of an RNA transcript as well as any processing to produce a mature RNA product or an mRNA (for protein-coding genes) and the translation of that mRNA into protein. Some protein processing events may be included when they are required to form an active form of…	TBS1(YBR150C);SKN7(YHR206W);ACM1(YPL267W);RPC37(YKR025W)
GO:0044710	3 of 34 (8.8%)	7.57	0.40	888 of 3988 (22.3%)	0.0371	1	single-organism metabolic process	"A metabolic process - chemical reactions and pathways, including anabolism and catabolism, by which living organisms transform chemical substances - which involves a single organism." [GOC:jl]	GPD1(YDL022W);STE6(YKL209C);PLB2(YMR006C)
GO:0006396	0 of 34 (0.0%)	3.02	0.00	354 of 3988 (8.9%)	0.0418	1	RNA processing	"Any process involved in the conversion of one or more primary RNA transcripts into one or more mature RNA molecules." [GOC:mah]
GO:0019538	4 of 34 (11.8%)	8.62	0.46	1011 of 3988 (25.4%)	0.0441	1	protein metabolic process	"The chemical reactions and pathways involving a specific protein, rather than of proteins in general. Includes protein modification." [GOC:ma]	DAS1(YJL149W);RAD5(YLR032W);ACM1(YPL267W);PUP3(YER094C)
MOLECULAR_FUNCTION
GO_term	set	expected	enrichment	background	p_fisher(1side)	fdr	Name	Description
GO:0004527	4 of 34 (11.8%)	0.22	18.05	26 of 3988 (0.7%)	5.77e-05	0.109	exonuclease activity	"Catalysis of the hydrolysis of ester linkages within nucleic acids by removing nucleotide residues from the 3' or 5' end." [GOC:mah, ISBN:0198547684]	POL32(YJR043C);RAD27(YKL113C);PSO2(YMR137C);POL31(YJR006W)
GO:0003887	3 of 34 (8.8%)	0.13	23.46	15 of 3988 (0.4%)	0.00024	0.113	DNA-directed DNA polymerase activity	"Catalysis of the reaction: deoxynucleoside triphosphate + DNA(n) = diphosphate + DNA(n+1); the synthesis of DNA from deoxyribonucleotide triphosphates in the presence of a DNA template and primer." [EC:2.7.7.7, ISBN:0198547684]	POL32(YJR043C);REV1(YOR346W);POL31(YJR006W)
GO:0034061	3 of 34 (8.8%)	0.13	23.46	15 of 3988 (0.4%)	0.00024	0.113	DNA polymerase activity	"Catalysis of the reaction: deoxynucleoside triphosphate + DNA(n) = diphosphate + DNA(n+1); the synthesis of DNA from deoxyribonucleotide triphosphates in the presence of a nucleic acid template and primer." [EC:2.7.7.7, GOC:mah]	POL32(YJR043C);REV1(YOR346W);POL31(YJR006W)
GO:0008310	2 of 34 (5.9%)	0.03	58.65	4 of 3988 (0.1%)	0.000419	0.113	single-stranded DNA specific 3'-5' exodeoxyribonuclease activity	"Catalysis of the sequential cleavage of mononucleotides from a free 3' terminus of a single-stranded DNA molecule." [GOC:mah]	POL32(YJR043C);POL31(YJR006W)
GO:0008297	2 of 34 (5.9%)	0.03	58.65	4 of 3988 (0.1%)	0.000419	0.113	single-stranded DNA specific exodeoxyribonuclease activity	"Catalysis of the sequential cleavage of mononucleotides from a free 5' or 3' terminus of a single-stranded DNA molecule." [GOC:mah]	POL32(YJR043C);POL31(YJR006W)
GO:0003689	2 of 34 (5.9%)	0.03	58.65	4 of 3988 (0.1%)	0.000419	0.113	DNA clamp loader activity	"Catalysis of the reaction: ATP + H2O = ADP + phosphate, to drive the opening of the ring structure of the PCNA complex, or any of the related sliding clamp complexes, and their closing around the DNA duplex." [GOC:mah, GOC:vw, PMID:16082778]	RFC5(YBR087W);RFC4(YOL094C)
GO:0033170	2 of 34 (5.9%)	0.03	58.65	4 of 3988 (0.1%)	0.000419	0.113	protein-DNA loading ATPase activity	"Catalysis of the reaction: ATP + H2O = ADP + phosphate, to drive the assembly of a protein or protein complex onto a DNA molecule." [GOC:mah, GOC:vw]	RFC5(YBR087W);RFC4(YOL094C)
GO:0008409	2 of 34 (5.9%)	0.04	46.92	5 of 3988 (0.1%)	0.000694	0.161	5'-3' exonuclease activity	"Catalysis of the hydrolysis of ester linkages within nucleic acids by removing nucleotide residues from the 5' end." [GOC:ai]	RAD27(YKL113C);PSO2(YMR137C)
GO:0016779	4 of 34 (11.8%)	0.43	9.38	50 of 3988 (1.3%)	0.000769	0.161	nucleotidyltransferase activity	"Catalysis of the transfer of a nucleotidyl group to a reactant." [ISBN:0198506732]	POL32(YJR043C);REV1(YOR346W);POL31(YJR006W);RPC37(YKR025W)
GO:0003677	10 of 34 (29.4%)	3.23	3.09	379 of 3988 (9.5%)	0.000867	0.163	DNA binding	"Any molecular function by which a gene product interacts selectively and non-covalently with DNA (deoxyribonucleic acid)." [GOC:dph, GOC:jl, GOC:tb, GOC:vw]	TBS1(YBR150C);SKN7(YHR206W);RAD27(YKL113C);RAD5(YLR032W);RIF2(YLR453C);PSO2(YMR137C);REV1(YOR346W);RFC5(YBR087W);POL31(YJR006W);RFC4(YOL094C)
GO:0008296	2 of 34 (5.9%)	0.05	39.10	6 of 3988 (0.2%)	0.00104	0.177	3'-5'-exodeoxyribonuclease activity	"Catalysis of the sequential cleavage of mononucleotides from a free 3' terminus of a DNA molecule." [GOC:mah]	POL32(YJR043C);POL31(YJR006W)
GO:0004536	3 of 34 (8.8%)	0.22	13.53	26 of 3988 (0.7%)	0.00129	0.202	deoxyribonuclease activity	"Catalysis of the hydrolysis of ester linkages within deoxyribonucleic acid." [GOC:mah, ISBN:0198547684]	POL32(YJR043C);RAD27(YKL113C);POL31(YJR006W)
GO:0016895	2 of 34 (5.9%)	0.06	33.51	7 of 3988 (0.2%)	0.00144	0.209	exodeoxyribonuclease activity, producing 5'-phosphomonoesters	"Catalysis of the hydrolysis of ester linkages within deoxyribonucleic acids by removing nucleotide residues from the 3' or 5' end to yield 5' phosphomonoesters." [GOC:ai]	POL32(YJR043C);POL31(YJR006W)
GO:0004529	2 of 34 (5.9%)	0.07	29.32	8 of 3988 (0.2%)	0.00191	0.257	exodeoxyribonuclease activity	"Catalysis of the sequential cleavage of mononucleotides from a free 5' or 3' terminus of a DNA molecule." [GOC:mah, ISBN:0198547684]	POL32(YJR043C);POL31(YJR006W)
GO:0004518	4 of 34 (11.8%)	0.59	6.80	69 of 3988 (1.7%)	0.00257	0.323	nuclease activity	"Catalysis of the hydrolysis of ester linkages within nucleic acids." [ISBN:0198547684]	POL32(YJR043C);RAD27(YKL113C);PSO2(YMR137C);POL31(YJR006W)
GO:0008094	3 of 34 (8.8%)	0.39	7.65	46 of 3988 (1.2%)	0.00669	0.729	DNA-dependent ATPase activity	"Catalysis of the reaction: ATP + H2O = ADP + phosphate; this reaction requires the presence of single- or double-stranded DNA, and it drives another reaction." [EC:3.6.1.3, GOC:jl]	RAD5(YLR032W);RFC5(YBR087W);RFC4(YOL094C)
GO:0008408	2 of 34 (5.9%)	0.14	14.66	16 of 3988 (0.4%)	0.00786	0.729	3'-5' exonuclease activity	"Catalysis of the hydrolysis of ester linkages within nucleic acids by removing nucleotide residues from the 3' end." [GOC:ai]	POL32(YJR043C);POL31(YJR006W)
GO:0016796	2 of 34 (5.9%)	0.14	14.66	16 of 3988 (0.4%)	0.00786	0.729	exonuclease activity, active with either ribo- or deoxyribonucleic acids and producing 5'-phosphomonoesters	"Catalysis of the hydrolysis of ester linkages within nucleic acids by removing nucleotide residues from the 3' or 5' end to yield 5' phosphomonoesters." [GOC:mah]	POL32(YJR043C);POL31(YJR006W)
GO:0017125	1 of 34 (2.9%)	0.01	117.29	1 of 3988 (0.0%)	0.00853	0.729	deoxycytidyl transferase activity	"Catalysis of the insertion of a dCMP residue opposite a template abasic site in DNA." [PMID:10535901]	REV1(YOR346W)
GO:0055105	1 of 34 (2.9%)	0.01	117.29	1 of 3988 (0.0%)	0.00853	0.729	ubiquitin-protein ligase inhibitor activity	"Stops, prevents or reduces the activity of a ubiquitin-protein ligase." [GOC:BHF, GOC:rl]	ACM1(YPL267W)
GO:0055104	1 of 34 (2.9%)	0.01	117.29	1 of 3988 (0.0%)	0.00853	0.729	ligase inhibitor activity	"Stops, prevents or reduces the activity of a ligase." [GOC:BHF, GOC:rl]	ACM1(YPL267W)
GO:0061133	1 of 34 (2.9%)	0.01	117.29	1 of 3988 (0.0%)	0.00853	0.729	endopeptidase activator activity	"Increases the activity of an endopeptidase, any enzyme that hydrolyzes nonterminal peptide bonds in polypeptides." [GOC:dph, GOC:tb]	PUP3(YER094C)
GO:0003684	2 of 34 (5.9%)	0.19	10.66	22 of 3988 (0.6%)	0.0146	1	damaged DNA binding	"Interacting selectively and non-covalently with damaged DNA." [GOC:jl]	PSO2(YMR137C);REV1(YOR346W)
GO:0004367	1 of 34 (2.9%)	0.02	58.65	2 of 3988 (0.1%)	0.017	1	glycerol-3-phosphate dehydrogenase [NAD+] activity	"Catalysis of the reaction: sn-glycerol 3-phosphate + NAD+ = glycerone phosphate + NADH + H+." [EC:1.1.1.8]	GPD1(YDL022W)
GO:0004622	1 of 34 (2.9%)	0.02	58.65	2 of 3988 (0.1%)	0.017	1	lysophospholipase activity	"Catalysis of the reaction: 2-lysophosphatidylcholine + H2O = glycerophosphocholine + a carboxylate." [EC:3.1.1.5]	PLB2(YMR006C)
GO:0016504	1 of 34 (2.9%)	0.02	58.65	2 of 3988 (0.1%)	0.017	1	peptidase activator activity	"Increases the activity of a peptidase, any enzyme that catalyzes the hydrolysis peptide bonds." [GOC:ai]	PUP3(YER094C)
GO:0042623	4 of 34 (11.8%)	1.10	3.64	129 of 3988 (3.2%)	0.0229	1	ATPase activity, coupled	"Catalysis of the reaction: ATP + H2O = ADP + phosphate; this reaction directly drives some other reaction, for example ion transport across a membrane." [EC:3.6.1.3, GOC:jl]	STE6(YKL209C);RAD5(YLR032W);RFC5(YBR087W);RFC4(YOL094C)
GO:0003676	11 of 34 (32.4%)	5.92	1.86	694 of 3988 (17.4%)	0.0246	1	nucleic acid binding	"Interacting selectively and non-covalently with any nucleic acid." [GOC:jl]	TBS1(YBR150C);YGR001C(YGR001C);SKN7(YHR206W);RAD27(YKL113C);RAD5(YLR032W);RIF2(YLR453C);PSO2(YMR137C);REV1(YOR346W);RFC5(YBR087W);POL31(YJR006W);RFC4(YOL094C)
GO:0015095	1 of 34 (2.9%)	0.03	39.10	3 of 3988 (0.1%)	0.0254	1	magnesium ion transmembrane transporter activity	"Catalysis of the transfer of magnesium (Mg) ions from one side of a membrane to the other." [GOC:dgf]	MNR2(YKL064W)
GO:0015440	1 of 34 (2.9%)	0.03	39.10	3 of 3988 (0.1%)	0.0254	1	peptide-transporting ATPase activity	"Catalysis of the reaction: ATP + H2O + peptide(in) = ADP + phosphate + peptide(out). Peptides exported include alpha-hemolysin, cyclolysin, colicin V and siderophores from Gram-negative bacteria, and bacteriocin, subtilin, competence factor and pediocin from Gram-positive bacteria." [EC:3.6.3.43]	STE6(YKL209C)
GO:0009378	1 of 34 (2.9%)	0.03	39.10	3 of 3988 (0.1%)	0.0254	1	four-way junction helicase activity	"Catalysis of the unwinding of the DNA helix of DNA containing four-way junctions, including Holliday junctions." [GOC:jl, PMID:9442895]	RAD5(YLR032W)
GO:0000403	1 of 34 (2.9%)	0.03	39.10	3 of 3988 (0.1%)	0.0254	1	Y-form DNA binding	"Interacting selectively and non-covalently with segment of DNA shaped like a Y. This shape occurs when DNA contains a region of paired double-stranded DNA on one end and a region of unpaired DNA strands on the opposite end." [GOC:elh, PMID:16781730]	RAD5(YLR032W)
GO:0016788	5 of 34 (14.7%)	1.76	2.83	207 of 3988 (5.2%)	0.0292	1	hydrolase activity, acting on ester bonds	"Catalysis of the hydrolysis of any ester bond." [GOC:jl]	POL32(YJR043C);RAD27(YKL113C);PLB2(YMR006C);PSO2(YMR137C);POL31(YJR006W)
GO:0000156	1 of 34 (2.9%)	0.03	29.32	4 of 3988 (0.1%)	0.0337	1	phosphorelay response regulator activity	"Responds to a phosphorelay sensor to initiate a change in cell state or activity. The activity of the response regulator is regulated by transfer of a phosphate from a histidine residue in the sensor, to an aspartate residue in the response regulator. Many but not all response regulators act as transcriptional regulators to elicit a response." [GOC:bf, PMID:10966457, PMID:11842140]	SKN7(YHR206W)
GO:0055106	1 of 34 (2.9%)	0.03	29.32	4 of 3988 (0.1%)	0.0337	1	ubiquitin-protein ligase regulator activity	"Modulates the activity of a ubiquitin-protein ligase, an enzyme that catalyzes the covalent attachment of ubiquitin to lysine in a substrate protein." [GOC:BHF, GOC:rl]	ACM1(YPL267W)
GO:0055103	1 of 34 (2.9%)	0.03	29.32	4 of 3988 (0.1%)	0.0337	1	ligase regulator activity	"Modulates the activity of a ligase." [GOC:BHF, GOC:rl]	ACM1(YPL267W)
GO:0061135	1 of 34 (2.9%)	0.03	29.32	4 of 3988 (0.1%)	0.0337	1	endopeptidase regulator activity	"Modulates the activity of a peptidase, any enzyme that hydrolyzes nonterminal peptide bonds in polypeptides." [GOC:dph, GOC:tb]	PUP3(YER094C)
GO:0016787	10 of 34 (29.4%)	5.57	1.80	653 of 3988 (16.4%)	0.0406	1	hydrolase activity	"Catalysis of the hydrolysis of various bonds, e.g. C-O, C-N, C-C, phosphoric anhydride bonds, etc. Hydrolase is the systematic name for any enzyme of EC class 3." [ISBN:0198506732]	POL32(YJR043C);RAD27(YKL113C);STE6(YKL209C);RAD5(YLR032W);PLB2(YMR006C);PSO2(YMR137C);RFC5(YBR087W);PUP3(YER094C);POL31(YJR006W);RFC4(YOL094C)
GO:0017108	1 of 34 (2.9%)	0.04	23.46	5 of 3988 (0.1%)	0.0419	1	5'-flap endonuclease activity	"Catalysis of the cleavage of a 5' flap structure in DNA, but not other DNA structures; processes the 5' ends of Okazaki fragments in lagging strand DNA synthesis." [PMID:9778254]	RAD27(YKL113C)
GO:0048256	1 of 34 (2.9%)	0.04	23.46	5 of 3988 (0.1%)	0.0419	1	flap endonuclease activity	"Catalysis of the cleavage of a flap structure in DNA, but not other DNA structures; processes the ends of Okazaki fragments in lagging strand DNA synthesis." [GOC:jid]	RAD27(YKL113C)
GO:0032934	1 of 34 (2.9%)	0.04	23.46	5 of 3988 (0.1%)	0.0419	1	sterol binding	"Interacting selectively and non-covalently with a sterol, any steroid containing a hydroxy group in the 3 position, closely related to cholestan-3-ol." [CHEBI:15889, GOC:mah]	PRY2(YKR013W)
GO:0005496	1 of 34 (2.9%)	0.04	23.46	5 of 3988 (0.1%)	0.0419	1	steroid binding	"Interacting selectively and non-covalently with a steroid, any of a large group of substances that have in common a ring system based on 1,2-cyclopentanoperhydrophenanthrene." [GOC:jl, ISBN:0198506732]	PRY2(YKR013W)
GO:0000400	1 of 34 (2.9%)	0.04	23.46	5 of 3988 (0.1%)	0.0419	1	four-way junction DNA binding	"Interacting selectively and non-covalently with DNA containing four-way junctions, also known as Holliday junctions, a structure where two DNA double strands are held together by reciprocal exchange of two of the four strands, one strand each from the two original helices." [GOC:krc, ISBN:0815332181, PMID:15563464]	RAD5(YLR032W)
GO:0004620	1 of 34 (2.9%)	0.04	23.46	5 of 3988 (0.1%)	0.0419	1	phospholipase activity	"Catalysis of the hydrolysis of a glycerophospholipid." [ISBN:0198506732]	PLB2(YMR006C)
GO:0061134	1 of 34 (2.9%)	0.04	23.46	5 of 3988 (0.1%)	0.0419	1	peptidase regulator activity	"Modulates the activity of a peptidase, any enzyme that catalyzes the hydrolysis peptide bonds." [GOC:dph, GOC:tb]	PUP3(YER094C)
CELLULAR_COMPONENT
GO_term	set	expected	enrichment	background	p_fisher(1side)	fdr	Name	Description
GO:0031391	3 of 34 (8.8%)	0.03	87.97	4 of 3988 (0.1%)	2.25e-06	0.00177	Elg1 RFC-like complex	"A pentameric complex related to replication factor C, which loads the DNA polymerase processivity factor proliferating cell nuclear antigen (PCNA) onto DNA and has roles in telomere length regulation and other aspects of genome stability. In Saccharomyces the subunits are known as Elg1p, Rfc2p, Rfc3p, Rfc4p, and Rfc5p." [PMID:14614842]	ELG1(YOR144C);RFC5(YBR087W);RFC4(YOL094C)
GO:0005657	5 of 34 (14.7%)	0.35	14.30	41 of 3988 (1.0%)	2e-05	0.00783	replication fork	"The Y-shaped region of a replicating DNA molecule, resulting from the separation of the DNA strands and in which the synthesis of new strands takes place. Also includes associated protein complexes." [GOC:mah, ISBN:0198547684]	POL32(YJR043C);REV1(YOR346W);RFC5(YBR087W);POL31(YJR006W);RFC4(YOL094C)
GO:0043625	2 of 34 (5.9%)	0.03	78.20	3 of 3988 (0.1%)	0.000211	0.0349	delta DNA polymerase complex	"A multimeric DNA polymerase enzyme complex which differs in composition amongst species; in humans it is a heterotetramer of four subunits of approximately 125, 50, 68 and 12kDa, while in S. cerevisiae, it has three different subunits which form a heterotrimer, and the active enzyme is a dimer of this heterotrimer. Functions in DNA replication, mismatch repair and excision repair." [GOC:jl, ISBN…	POL32(YJR043C);POL31(YJR006W)
GO:0005663	2 of 34 (5.9%)	0.03	78.20	3 of 3988 (0.1%)	0.000211	0.0349	DNA replication factor C complex	"A complex of five polypeptides in eukaryotes, and two in prokaryotes, that loads the DNA polymerase processivity factor proliferating cell nuclear antigen (PCNA) onto DNA, thereby permitting processive DNA synthesis catalyzed by DNA polymerase." [PMID:14614842, PMID:14646196, PMID:16172520]	RFC5(YBR087W);RFC4(YOL094C)
GO:0044427	9 of 34 (26.5%)	2.21	4.08	259 of 3988 (6.5%)	0.000222	0.0349	chromosomal part	"Any constituent part of a chromosome, a structure composed of a very long molecule of DNA and associated proteins (e.g. histones) that carries hereditary information." [GOC:jl]	LIN1(YHR156C);POL32(YJR043C);RAD5(YLR032W);RIF2(YLR453C);ELG1(YOR144C);REV1(YOR346W);RFC5(YBR087W);POL31(YJR006W);RFC4(YOL094C)
GO:0031389	2 of 34 (5.9%)	0.03	58.65	4 of 3988 (0.1%)	0.000419	0.0498	Rad17 RFC-like complex	"A pentameric protein complex related to replication factor C, which loads a trimeric complex of checkpoint proteins (known as the checkpoint clamp or 9-1-1 complex) onto DNA at damage sites; functions in DNA damage cell cycle checkpoints. In Schizosaccharomyces pombe the subunits are known as Rad17, Rfc2, Rfc3, Rfc4, and Rfc5, while in Saccharomyces cerevisiae the subunits are known as Rad24p, R…	RFC5(YBR087W);RFC4(YOL094C)
GO:0005694	9 of 34 (26.5%)	2.42	3.72	284 of 3988 (7.1%)	0.000445	0.0498	chromosome	"A structure composed of a very long molecule of DNA and associated proteins (e.g. histones) that carries hereditary information." [ISBN:0198547684]	LIN1(YHR156C);POL32(YJR043C);RAD5(YLR032W);RIF2(YLR453C);ELG1(YOR144C);REV1(YOR346W);RFC5(YBR087W);POL31(YJR006W);RFC4(YOL094C)
GO:0031390	2 of 34 (5.9%)	0.05	39.10	6 of 3988 (0.2%)	0.00104	0.102	Ctf18 RFC-like complex	"A heptameric complex related to replication factor C, which loads the DNA polymerase processivity factor proliferating cell nuclear antigen (PCNA) onto DNA and plays a vital role in chromosome cohesion. In Saccharomyces the subunits are known as Ctf18p, Rfc2p, Rfc3p, Rfc4p, Rfc5p, Dcc1p, and Ctf8p." [PMID:14614842]	RFC5(YBR087W);RFC4(YOL094C)
GO:0042575	2 of 34 (5.9%)	0.07	29.32	8 of 3988 (0.2%)	0.00191	0.167	DNA polymerase complex	"A protein complex that possesses DNA polymerase activity and is involved in template directed synthesis of DNA." [GOC:jl, PMID:12045093]	POL32(YJR043C);POL31(YJR006W)
GO:0032993	3 of 34 (8.8%)	0.38	8.00	44 of 3988 (1.1%)	0.00591	0.393	protein-DNA complex	"A macromolecular complex containing both protein and DNA molecules." [GOC:mah]	POL32(YJR043C);RIF2(YLR453C);POL31(YJR006W)
GO:0043601	2 of 34 (5.9%)	0.12	16.76	14 of 3988 (0.4%)	0.00602	0.393	nuclear replisome	"A multi-component enzymatic machine at the nuclear replication fork, which mediates DNA replication. Includes DNA primase, one or more DNA polymerases, DNA helicases, and other proteins." [GOC:jl, GOC:mtg_sensu]	POL32(YJR043C);POL31(YJR006W)
GO:0030894	2 of 34 (5.9%)	0.12	16.76	14 of 3988 (0.4%)	0.00602	0.393	replisome	"A multi-component enzymatic machine at the replication fork which mediates DNA replication. Includes DNA primase, one or more DNA polymerases, DNA helicases, and other proteins." [GOC:mah, GOC:vw]	POL32(YJR043C);POL31(YJR006W)
GO:0005576	3 of 34 (8.8%)	0.52	5.77	61 of 3988 (1.5%)	0.0145	0.877	extracellular region	"The space external to the outermost structure of a cell. For cells without external protective or external encapsulating structures this refers to space outside of the plasma membrane. This term covers the host cell environment outside an intracellular parasite." [GOC:go_curators]	PAU24(YBR301W);PRY2(YKR013W);PLB2(YMR006C)
GO:0009277	3 of 34 (8.8%)	0.54	5.59	63 of 3988 (1.6%)	0.0159	0.881	fungal-type cell wall	"A rigid yet dynamic structure surrounding the plasma membrane that affords protection from stresses and contributes to cell morphogenesis, consisting of extensively cross-linked glycoproteins and carbohydrates. The glycoproteins may be modified with N- or O-linked carbohydrates, or glycosylphosphatidylinositol (GPI) anchors; the polysaccharides are primarily branched glucans, including beta-link…	PAU24(YBR301W);PLB2(YMR006C);YNL190W(YNL190W)
GO:0005618	3 of 34 (8.8%)	0.56	5.33	66 of 3988 (1.7%)	0.018	0.881	cell wall	"The rigid or semi-rigid envelope lying outside the cell membrane of plant, fungal, and most prokaryotic cells, maintaining their shape and protecting them from osmotic lysis. In plants it is made of cellulose and, often, lignin; in fungi it is composed largely of polysaccharides; in bacteria it is composed of peptidoglycan." [ISBN:0198547684]	PAU24(YBR301W);PLB2(YMR006C);YNL190W(YNL190W)
GO:0030312	3 of 34 (8.8%)	0.56	5.33	66 of 3988 (1.7%)	0.018	0.881	external encapsulating structure	"A structure that lies outside the plasma membrane and surrounds the entire cell." [GOC:go_curators]	PAU24(YBR301W);PLB2(YMR006C);YNL190W(YNL190W)
GO:0044454	5 of 34 (14.7%)	1.70	2.95	199 of 3988 (5.0%)	0.0251	1	nuclear chromosome part	"Any constituent part of a nuclear chromosome, a chromosome found in the nucleus of a eukaryotic cell." [GOC:jl]	POL32(YJR043C);RAD5(YLR032W);RIF2(YLR453C);REV1(YOR346W);POL31(YJR006W)
GO:0009331	1 of 34 (2.9%)	0.03	39.10	3 of 3988 (0.1%)	0.0254	1	glycerol-3-phosphate dehydrogenase complex	"An enzyme complex that catalyzes the dehydrogenation of sn-glycerol 3-phosphate to form glycerone phosphate." [EC:1.1.5.3]	GPD1(YDL022W)
GO:0000781	2 of 34 (5.9%)	0.28	7.11	33 of 3988 (0.8%)	0.0316	1	chromosome, telomeric region	"The terminal region of a linear chromosome that includes the telomeric DNA repeats and associated proteins." [GOC:elh]	RIF2(YLR453C);ELG1(YOR144C)
GO:0019774	1 of 34 (2.9%)	0.03	29.32	4 of 3988 (0.1%)	0.0337	1	proteasome core complex, beta-subunit complex	"The proteasome core subcomplex that constitutes the two inner rings of the proteasome core complex. An example of this component is found in Mus musculus." [GOC:jl, GOC:mtg_sensu, GOC:rb, PMID:10854779]	PUP3(YER094C)
GO:0043596	2 of 34 (5.9%)	0.30	6.70	35 of 3988 (0.9%)	0.0352	1	nuclear replication fork	"The Y-shaped region of a nuclear replicating DNA molecule, resulting from the separation of the DNA strands and in which the synthesis of new strands takes place. Also includes associated protein complexes." [GOC:jl, GOC:mtg_sensu]	POL32(YJR043C);POL31(YJR006W)
GO:0000228	5 of 34 (14.7%)	1.87	2.68	219 of 3988 (5.5%)	0.0361	1	nuclear chromosome	"A chromosome found in the nucleus of a eukaryotic cell." [GOC:mah]	POL32(YJR043C);RAD5(YLR032W);RIF2(YLR453C);REV1(YOR346W);POL31(YJR006W)
GO:0005634	18 of 34 (52.9%)	12.78	1.41	1499 of 3988 (37.6%)	0.0484	1	nucleus	"A membrane-bounded organelle of eukaryotic cells in which chromosomes are housed and replicated. In most cells, the nucleus contains all of the cell's chromosomes except the organellar chromosomes, and is the site of RNA synthesis and processing. In some species, or in specialized cell types, RNA metabolism or DNA replication may be absent." [GOC:go_curators]	TBS1(YBR150C);GPD1(YDL022W);LIN1(YHR156C);SKN7(YHR206W);POL32(YJR043C);RAD27(YKL113C);RAD5(YLR032W);RIF2(YLR453C);YML108W(YML108W);PSO2(YMR137C);ELG1(YOR144C);REV1(YOR346W);ACM1(YPL267W);RFC5(YBR087W);PUP3(YER094C);POL31(YJR006W);RPC37(YKR025W);RFC4(YOL094C)

## Sheet: Randomization 8
BIOLOGICAL_PROCESS
GO_term	set	expected	enrichment	background	p_fisher(1side)	fdr	Name	Description
GO:0006272	5 of 36 (13.9%)	0.08	61.54	9 of 3988 (0.2%)	5.52e-09	2.15e-05	leading strand elongation	"The synthesis of DNA from a template strand in the 5' to 3' direction; leading strand elongation is continuous as it proceeds in the same direction as the replication fork." [ISBN:071673706X, ISBN:0815316194]	POL32(YJR043C);RFC5(YBR087W);POL3(YDL102W);POL31(YJR006W);RFC4(YOL094C)
GO:0006271	6 of 36 (16.7%)	0.22	27.69	24 of 3988 (0.6%)	4.19e-08	7.12e-05	DNA strand elongation involved in DNA replication	"The process in which a DNA strand is synthesized from template DNA during replication by the action of polymerases, which add nucleotides to the 3' end of the nascent DNA strand." [ISBN:071673706X, ISBN:0815316194]	POL32(YJR043C);RAD27(YKL113C);RFC5(YBR087W);POL3(YDL102W);POL31(YJR006W);RFC4(YOL094C)
GO:0022616	6 of 36 (16.7%)	0.23	26.59	25 of 3988 (0.6%)	5.48e-08	7.12e-05	DNA strand elongation	"The DNA metabolic process in which a DNA strand is synthesized by adding nucleotides to the 3' end of an existing DNA stand." [GOC:isa_complete]	POL32(YJR043C);RAD27(YKL113C);RFC5(YBR087W);POL3(YDL102W);POL31(YJR006W);RFC4(YOL094C)
GO:0043137	4 of 36 (11.1%)	0.06	63.30	7 of 3988 (0.2%)	1.92e-07	0.000187	DNA replication, removal of RNA primer	"Removal of the Okazaki RNA primer from the lagging strand of replicating DNA, by a combination of the actions of DNA polymerase, DNA helicase and an endonuclease." [GOC:jl, PMID:12424238]	POL32(YJR043C);RAD27(YKL113C);POL3(YDL102W);POL31(YJR006W)
GO:0006298	5 of 36 (13.9%)	0.15	32.58	17 of 3988 (0.4%)	2.57e-07	0.000201	mismatch repair	"A system for the correction of errors in which an incorrect base, which cannot form hydrogen bonds with the corresponding base in the parent strand, is incorporated into the daughter strand. The mismatch repair system promotes genomic fidelity by repairing base-base mismatches, insertion-deletion loops and heterologies generated during DNA replication and recombination." [ISBN:0198506732, PMID:1…	POL32(YJR043C);RFC5(YBR087W);POL3(YDL102W);POL31(YJR006W);RFC4(YOL094C)
GO:0006260	9 of 36 (25.0%)	1.04	8.67	115 of 3988 (2.9%)	4.94e-07	0.000321	DNA replication	"The cellular metabolic process in which a cell duplicates one or more molecules of DNA. DNA replication begins when specific sequences, known as origins of replication, are recognized and bound by initiation proteins, and ends when the original DNA molecule has been completely duplicated and the copies topologically separated. The unit of replication usually corresponds to the genome of the cell…	POL32(YJR043C);RAD27(YKL113C);RIF2(YLR453C);ELG1(YOR144C);REV1(YOR346W);RFC5(YBR087W);POL3(YDL102W);POL31(YJR006W);RFC4(YOL094C)
GO:0033567	4 of 36 (11.1%)	0.08	49.23	9 of 3988 (0.2%)	6.83e-07	0.00038	DNA replication, Okazaki fragment processing	"The DNA metabolic process, occurring during lagging strand synthesis, by which RNA primers are removed from Okazaki fragments, the resulting gaps filled by DNA polymerization, and the ends ligated to form a continuous strand." [GOC:mah, ISBN:0716720094]	POL32(YJR043C);RAD27(YKL113C);POL3(YDL102W);POL31(YJR006W)
GO:0006301	5 of 36 (13.9%)	0.21	24.08	23 of 3988 (0.6%)	1.35e-06	0.000656	postreplication repair	"The conversion of DNA-damage induced single-stranded gaps into large molecular weight DNA after replication. Includes pathways that remove replication-blocking lesions in conjunction with DNA replication." [GOC:elh]	POL32(YJR043C);RAD5(YLR032W);REV1(YOR346W);POL3(YDL102W);POL31(YJR006W)
GO:0006273	4 of 36 (11.1%)	0.12	34.09	13 of 3988 (0.3%)	3.78e-06	0.00147	lagging strand elongation	"The synthesis of DNA from a template strand in a net 3' to 5' direction. Lagging strand DNA elongation proceeds by discontinuous synthesis of short stretches of DNA, known as Okazaki fragments, from RNA primers; these fragments are then joined by DNA ligase. Although each segment of nascent DNA is synthesized in the 5' to 3' direction, the overall direction of lagging strand synthesis is 3' to 5…	POL32(YJR043C);RAD27(YKL113C);POL3(YDL102W);POL31(YJR006W)
GO:0006284	4 of 36 (11.1%)	0.12	34.09	13 of 3988 (0.3%)	3.78e-06	0.00147	base-excision repair	"In base excision repair, an altered base is removed by a DNA glycosylase enzyme, followed by excision of the resulting sugar phosphate. The small gap left in the DNA helix is filled in by the sequential action of DNA polymerase and DNA ligase." [ISBN:0815316194]	POL32(YJR043C);RAD27(YKL113C);POL3(YDL102W);POL31(YJR006W)
GO:0006281	10 of 36 (27.8%)	1.78	5.62	197 of 3988 (4.9%)	5.68e-06	0.00201	DNA repair	"The process of restoring DNA after damage. Genomes are subject to damage by chemical and physical agents in the environment (e.g. UV and ionizing radiations, chemical mutagens, fungal and bacterial toxins, etc.) and by free radicals or alkylating agents endogenously generated in metabolism. DNA is also damaged because of errors during its replication. A variety of different DNA repair pathways h…	POL32(YJR043C);RAD27(YKL113C);RAD5(YLR032W);PSO2(YMR137C);ELG1(YOR144C);REV1(YOR346W);RFC5(YBR087W);POL3(YDL102W);POL31(YJR006W);RFC4(YOL094C)
GO:0006261	7 of 36 (19.4%)	0.75	9.34	83 of 3988 (2.1%)	6.72e-06	0.00218	DNA-dependent DNA replication	"A DNA replication process that uses parental DNA as a template for the DNA-dependent DNA polymerases that synthesize the new strands." [GOC:mah, ISBN:0198506732]	POL32(YJR043C);RAD27(YKL113C);ELG1(YOR144C);RFC5(YBR087W);POL3(YDL102W);POL31(YJR006W);RFC4(YOL094C)
GO:0006278	4 of 36 (11.1%)	0.15	26.07	17 of 3988 (0.4%)	1.23e-05	0.00367	RNA-dependent DNA replication	"A DNA replication process that uses RNA as a template for RNA-dependent DNA polymerases (e.g. reverse transcriptase) that synthesize the new strands." [GOC:mah, ISBN:0198506732]	POL32(YJR043C);RIF2(YLR453C);POL3(YDL102W);POL31(YJR006W)
GO:0006974	10 of 36 (27.8%)	2.07	4.84	229 of 3988 (5.7%)	2.17e-05	0.00604	response to DNA damage stimulus	"Any process that results in a change in state or activity of a cell (in terms of movement, secretion, enzyme production, gene expression, etc.) as a result of a stimulus indicating damage to its DNA from environmental insults or errors during metabolism." [GOC:go_curators]	POL32(YJR043C);RAD27(YKL113C);RAD5(YLR032W);PSO2(YMR137C);ELG1(YOR144C);REV1(YOR346W);RFC5(YBR087W);POL3(YDL102W);POL31(YJR006W);RFC4(YOL094C)
GO:0033554	13 of 36 (36.1%)	3.84	3.39	425 of 3988 (10.7%)	4.41e-05	0.0115	cellular response to stress	"Any process that results in a change in state or activity of a cell (in terms of movement, secretion, enzyme production, gene expression, etc.) as a result of a stimulus indicating the organism is under stress. The stress is usually, but not necessarily, exogenous (e.g. temperature, humidity, ionizing radiation)." [GOC:mah]	GPD1(YDL022W);SKN7(YHR206W);POL32(YJR043C);RAD27(YKL113C);RAD5(YLR032W);PSO2(YMR137C);YNL190W(YNL190W);ELG1(YOR144C);REV1(YOR346W);RFC5(YBR087W);POL3(YDL102W);POL31(YJR006W);RFC4(YOL094C)
GO:0006259	11 of 36 (30.6%)	3.10	3.55	343 of 3988 (8.6%)	0.000136	0.0332	DNA metabolic process	"Any cellular metabolic process involving deoxyribonucleic acid. This is one of the two main types of nucleic acid, consisting of a long, unbranched macromolecule formed from one, or more commonly, two, strands of linked deoxyribonucleotides." [ISBN:0198506732]	POL32(YJR043C);RAD27(YKL113C);RAD5(YLR032W);RIF2(YLR453C);PSO2(YMR137C);ELG1(YOR144C);REV1(YOR346W);RFC5(YBR087W);POL3(YDL102W);POL31(YJR006W);RFC4(YOL094C)
GO:0006950	14 of 36 (38.9%)	4.98	2.81	552 of 3988 (13.8%)	0.000162	0.0372	response to stress	"Any process that results in a change in state or activity of a cell or an organism (in terms of movement, secretion, enzyme production, gene expression, etc.) as a result of a disturbance in organismal or cellular homeostasis, usually, but not necessarily, exogenous (e.g. temperature, humidity, ionizing radiation)." [GOC:mah]	PAU24(YBR301W);GPD1(YDL022W);SKN7(YHR206W);POL32(YJR043C);RAD27(YKL113C);RAD5(YLR032W);PSO2(YMR137C);YNL190W(YNL190W);ELG1(YOR144C);REV1(YOR346W);RFC5(YBR087W);POL3(YDL102W);POL31(YJR006W);RFC4(YOL094C)
GO:0071897	3 of 36 (8.3%)	0.14	22.16	15 of 3988 (0.4%)	0.000285	0.0618	DNA biosynthetic process	"The cellular DNA metabolic process resulting in the formation of DNA, deoxyribonucleic acid, one of the two main types of nucleic acid, consisting of a long unbranched macromolecule formed from one or two strands of linked deoxyribonucleotides, the 3'-phosphate group of each constituent deoxyribonucleotide being joined in 3',5'-phosphodiester linkage to the 5'-hydroxyl group of the deoxyribose m…	RAD27(YKL113C);RAD5(YLR032W);REV1(YOR346W)
GO:0006302	5 of 36 (13.9%)	0.66	7.59	73 of 3988 (1.8%)	0.000434	0.089	double-strand break repair	"The repair of double-strand breaks in DNA via homologous and nonhomologous mechanisms to reform a continuous DNA helix." [GOC:elh]	POL32(YJR043C);RAD27(YKL113C);RAD5(YLR032W);PSO2(YMR137C);ELG1(YOR144C)
GO:0050896	16 of 36 (44.4%)	7.49	2.14	830 of 3988 (20.8%)	0.00115	0.224	response to stimulus	"Any process that results in a change in state or activity of a cell or an organism (in terms of movement, secretion, enzyme production, gene expression, etc.) as a result of a stimulus. The process begins with detection of the stimulus and ends with a change in state or activity or the cell or organism." [GOC:ai, GOC:bf]	PAU24(YBR301W);GPD1(YDL022W);SKN7(YHR206W);POL32(YJR043C);RAD27(YKL113C);STE6(YKL209C);RAD5(YLR032W);PSO2(YMR137C);YNL190W(YNL190W);ELG1(YOR144C);REV1(YOR346W);RFC5(YBR087W);POL3(YDL102W);YPP1(YGR198W);POL31(YJR006W);RFC4(YOL094C)
GO:0051716	13 of 36 (36.1%)	5.89	2.21	652 of 3988 (16.3%)	0.00314	0.582	cellular response to stimulus	"Any process that results in a change in state or activity of a cell (in terms of movement, secretion, enzyme production, gene expression, etc.) as a result of a stimulus. The process begins with detection of the stimulus by a cell and ends with a change in state or activity or the cell." [GOC:bf, GOC:jl]	GPD1(YDL022W);SKN7(YHR206W);POL32(YJR043C);RAD27(YKL113C);RAD5(YLR032W);PSO2(YMR137C);YNL190W(YNL190W);ELG1(YOR144C);REV1(YOR346W);RFC5(YBR087W);POL3(YDL102W);POL31(YJR006W);RFC4(YOL094C)
GO:0042276	2 of 36 (5.6%)	0.09	22.16	10 of 3988 (0.3%)	0.00341	0.604	error-prone translesion synthesis	"The conversion of DNA-damage induced single-stranded gaps into large molecular weight DNA after replication by using a specialized DNA polymerase or replication complex to insert a defined nucleotide across the lesion. This process does not remove the replication-blocking lesions and causes an increase in the endogenous mutation level. For example, in E. coli, a low fidelity DNA polymerase, pol …	RAD5(YLR032W);REV1(YOR346W)
GO:0006289	3 of 36 (8.3%)	0.34	8.75	38 of 3988 (1.0%)	0.00459	0.758	nucleotide-excision repair	"A DNA repair process in which a small region of the strand surrounding the damage is removed from the DNA helix as an oligonucleotide. The small gap left in the DNA helix is filled in by the sequential action of DNA polymerase and DNA ligase. Nucleotide excision repair recognizes a wide range of substrates, including damage caused by UV irradiation (pyrimidine dimers and 6-4 photoproducts) and c…	POL32(YJR043C);POL3(YDL102W);POL31(YJR006W)
GO:0065008	8 of 36 (22.2%)	2.74	2.92	303 of 3988 (7.6%)	0.00467	0.758	regulation of biological quality	"Any process that modulates a qualitative or quantitative trait of a biological quality. A biological quality is a measurable attribute of an organism or part of an organism, such as size, mass, shape, color, etc." [GOC:dph, GOC:isa_complete, GOC:mah, GOC:pr, GOC:vw]	GPD1(YDL022W);SKN7(YHR206W);MNR2(YKL064W);STE6(YKL209C);RAD5(YLR032W);RIF2(YLR453C);ELG1(YOR144C);FSF1(YOR271C)
GO:0019985	2 of 36 (5.6%)	0.11	18.46	12 of 3988 (0.3%)	0.00494	0.77	translesion synthesis	"The replication of damaged DNA by synthesis across a lesion in the template strand; a specialized DNA polymerase or replication complex inserts a defined nucleotide across from the lesion which allows DNA synthesis to continue beyond the lesion. This process can be mutagenic depending on the damaged nucleotide and the inserted nucleotide." [GOC:elh, PMID:10535901]	RAD5(YLR032W);REV1(YOR346W)
GO:0007062	3 of 36 (8.3%)	0.37	8.11	41 of 3988 (1.0%)	0.00569	0.838	sister chromatid cohesion	"The cell cycle process in which the sister chromatids of a replicated chromosome are joined along the entire length of the chromosome." [GOC:mah, ISBN:0815316194]	ELG1(YOR144C);RFC5(YBR087W);RFC4(YOL094C)
GO:0006401	4 of 36 (11.1%)	0.74	5.40	82 of 3988 (2.1%)	0.00593	0.838	RNA catabolic process	"The chemical reactions and pathways resulting in the breakdown of RNA, ribonucleic acid, one of the two main type of nucleic acid, consisting of a long, unbranched macromolecule formed from ribonucleotides joined in 3',5'-phosphodiester linkage." [ISBN:0198506732]	POL32(YJR043C);RAD27(YKL113C);POL3(YDL102W);POL31(YJR006W)
GO:0042592	6 of 36 (16.7%)	1.72	3.50	190 of 3988 (4.8%)	0.00636	0.838	homeostatic process	"Any biological process involved in the maintenance of an internal steady state." [GOC:jl, ISBN:0395825172]	GPD1(YDL022W);MNR2(YKL064W);RAD5(YLR032W);RIF2(YLR453C);ELG1(YOR144C);FSF1(YOR271C)
GO:0006973	1 of 36 (2.8%)	0.01	110.78	1 of 3988 (0.0%)	0.00903	0.838	intracellular accumulation of glycerol	"The accumulation of glycerol within a cell, for example by increased glycerol biosynthesis combined with decreased permeability of the cell membrane to glycerol, in response to the detection of a hyperosmotic environment." [GOC:jl, PMID:11752666]	GPD1(YDL022W)
GO:0010961	1 of 36 (2.8%)	0.01	110.78	1 of 3988 (0.0%)	0.00903	0.838	cellular magnesium ion homeostasis	"Any process involved in the maintenance of an internal steady state of magnesium ions at the level of a cell." [GOC:dph, GOC:tb]	MNR2(YKL064W)
[truncated: 133 more rows]

## Sheet: Randomization 9
BIOLOGICAL_PROCESS
GO_term	set	expected	enrichment	background	p_fisher(1side)	fdr	Name	Description
[truncated: 195 more rows]

## Sheet: Randomization 10
BIOLOGICAL_PROCESS
[truncated: 172 more rows]
